# Supplementary material for: High endemism at cave entrances: a case study of spiders of the genus Uthina
Source: PubMed Central journal article supplement (PMC5075877; doi:10.1038/srep35757), 2016-10-24

**SUPPLEMENTARY INFORMATION**

**High endemism at cave entrances: a case study of spiders of the genus *Uthina***

[urn:lsid:zoobank.org:pub:A4549147-13E0-4C93-A334-20EF8B1724F1](https://zoobank.org/pub/A4549147-13E0-4C93-A334-20EF8B1724F1)

**Zhiyuan Yao<sup>1,2,3</sup>, Tingting Dong<sup>4</sup>, Guo Zheng<sup>4</sup>, Jinzhong Fu<sup>3</sup>, Shuqiang Li<sup>1,2</sup>**

<sup>1</sup>Key Laboratory of Zoological Systematics and Evolution, Institute of Zoology, Chinese Academy of Sciences, Beijing 100101, China

<sup>2</sup>Southeast Asia Biodiversity Research Institute, Chinese Academy of Sciences, Menglun, Mengla, Yunnan 666303, China

<sup>3</sup>Department of Integrative Biology, College of Biological Sciences, University of Guelph, Guelph N1G2W1, Canada

<sup>4</sup>College of Life Sciences, Shenyang Normal University, Shenyang 110034, China

Correspondence and requests for materials should be addressed to S.L. (email: [lisq@ioz.ac.cn](mailto:lisq@ioz.ac.cn))

## TABLE OF CONTENTS

|                                                                                                    |        |
|----------------------------------------------------------------------------------------------------|--------|
| <b>Figure S1.</b> Phylogenetic tree derived from the Bayesian analysis of the concatenated data... | III    |
| <b>Figure S2.</b> Individual gene trees.....                                                       | IV     |
| <b>Figure S3.</b> Results of bPTP species delimitation based on COI gene tree.....                 | V      |
| <b>Figure S4.</b> Results of bPTP species delimitation based on 28S gene tree.....                 | VI     |
| <b>Figure S5.</b> Results of GMYC species delimitation based on COI gene tree.....                 | VII    |
| <b>Table S1.</b> Sampling localities and GenBank accession numbers.....                            | VIII   |
| <b>Table S2.</b> List of cave clusters involved.....                                               | XIV    |
| <b>Table S3.</b> List of haplotypes and samples that share the same haplotype.....                 | XV     |
| <b>Text S1.</b> Description of <i>Uthina huahinensis</i> Yao & Li sp. nov.....                     | XIX    |
| <b>Text S2.</b> Description of <i>Uthina huifengi</i> Yao & Li sp. nov.....                        | XX     |
| <b>Text S3.</b> Description of <i>Uthina javaensis</i> Yao & Li sp. nov.....                       | XXI    |
| <b>Text S4.</b> Description of <i>Uthina muangensis</i> Yao & Li sp. nov.....                      | XXII   |
| <b>Text S5.</b> Description of <i>Uthina potharamensis</i> Yao & Li sp. nov.....                   | XXIII  |
| <b>Text S6.</b> Description of <i>Uthina sai yokensis</i> Yao & Li sp. nov.....                    | XXIII  |
| <b>Text S7.</b> Description of <i>Uthina sarikaensis</i> Yao & Li sp. nov.....                     | XXV    |
| <b>Text S8.</b> Description of <i>Uthina sulawesiensis</i> Yao & Li sp. nov.....                   | XXV    |
| <b>Text S9.</b> Description of <i>Uthina wongpromi</i> Yao & Li sp. nov.....                       | XXVI   |
| <b>Text S10.</b> Description of <i>Uthina yunchuni</i> Yao & Li sp. nov.....                       | XXVII  |
| <b>Text S11.</b> Description of <i>Uthina zhigangi</i> Yao & Li sp. nov.....                       | XXVIII |
| <b>Figures S6–S8.</b> Illustrations of <i>Uthina huahinensis</i> Yao & Li sp. nov.....             | XXIX   |
| <b>Figures S9–S11.</b> Illustrations of <i>Uthina huifengi</i> Yao & Li sp. nov.....               | XXXII  |
| <b>Figure S12.</b> Illustrations of <i>Uthina javaensis</i> Yao & Li sp. nov.....                  | XXXV   |
| <b>Figures S13–S15.</b> Illustrations of <i>Uthina muangensis</i> Yao & Li sp. nov.....            | XXXVI  |
| <b>Figures S16–S18.</b> Illustrations of <i>Uthina potharamensis</i> Yao & Li sp. nov.....         | XXXIX  |
| <b>Figures S19–S21.</b> Illustrations of <i>Uthina sai yokensis</i> Yao & Li sp. nov.....          | XLII   |
| <b>Figure S22.</b> Illustrations of <i>Uthina sarikaensis</i> Yao & Li sp. nov.....                | XLV    |
| <b>Figures S23–S25.</b> Illustrations of <i>Uthina sulawesiensis</i> Yao & Li sp. nov.....         | XLVI   |
| <b>Figures S26–S27.</b> Illustrations of <i>Uthina wongpromi</i> Yao & Li sp. nov.....             | XLIX   |
| <b>Figure S28.</b> Illustrations of <i>Uthina yunchuni</i> Yao & Li sp. nov.....                   | LI     |
| <b>Figure S29.</b> Illustrations of <i>Uthina zhigangi</i> Yao & Li sp. nov.....                   | LII    |

**Figure S1. Phylogenetic tree derived from the Bayesian analysis of the concatenated data. Bayesian posterior probabilities and bootstrap values from likelihood analysis are provided above and below branches respectively. Bootstrap values below 50 are not shown**

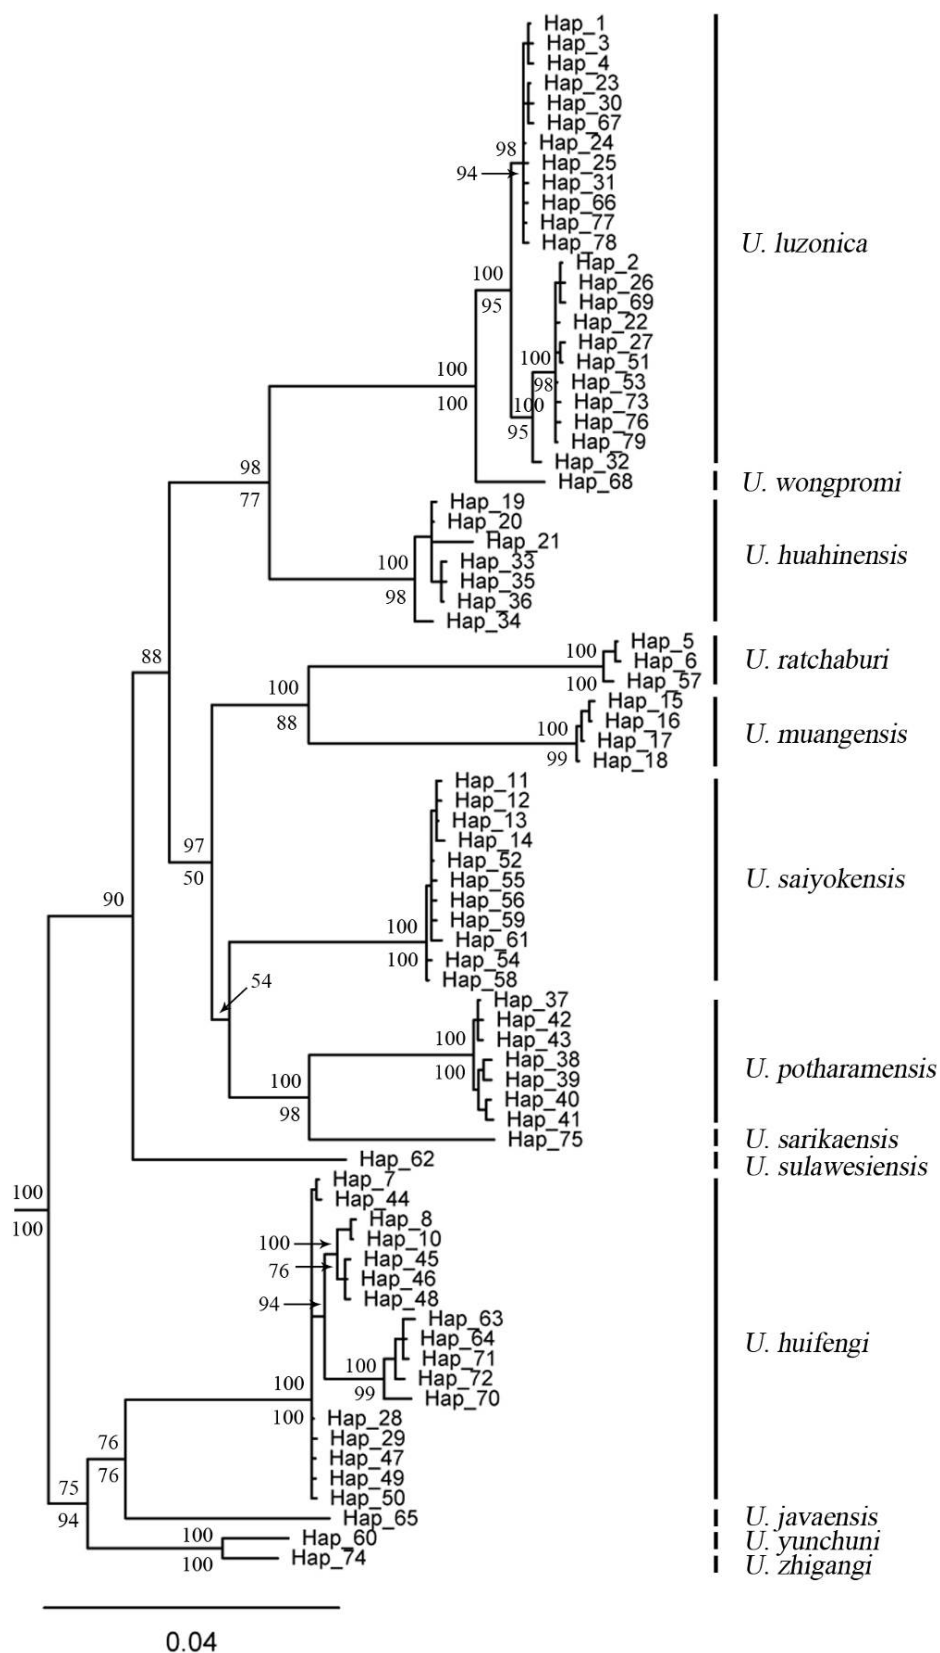

**Figure S2. Individual gene trees. a, COI gene tree derived from the Bayesian analysis; b, clade *U.huifengi* of the COI gene tree derived from maximum likelihood analysis; c, 28S gene tree. Bayesian posterior probabilities and bootstrap values from the likelihood analysis are provided above and below branches respectively. Bootstrap values below 50 are not shown**

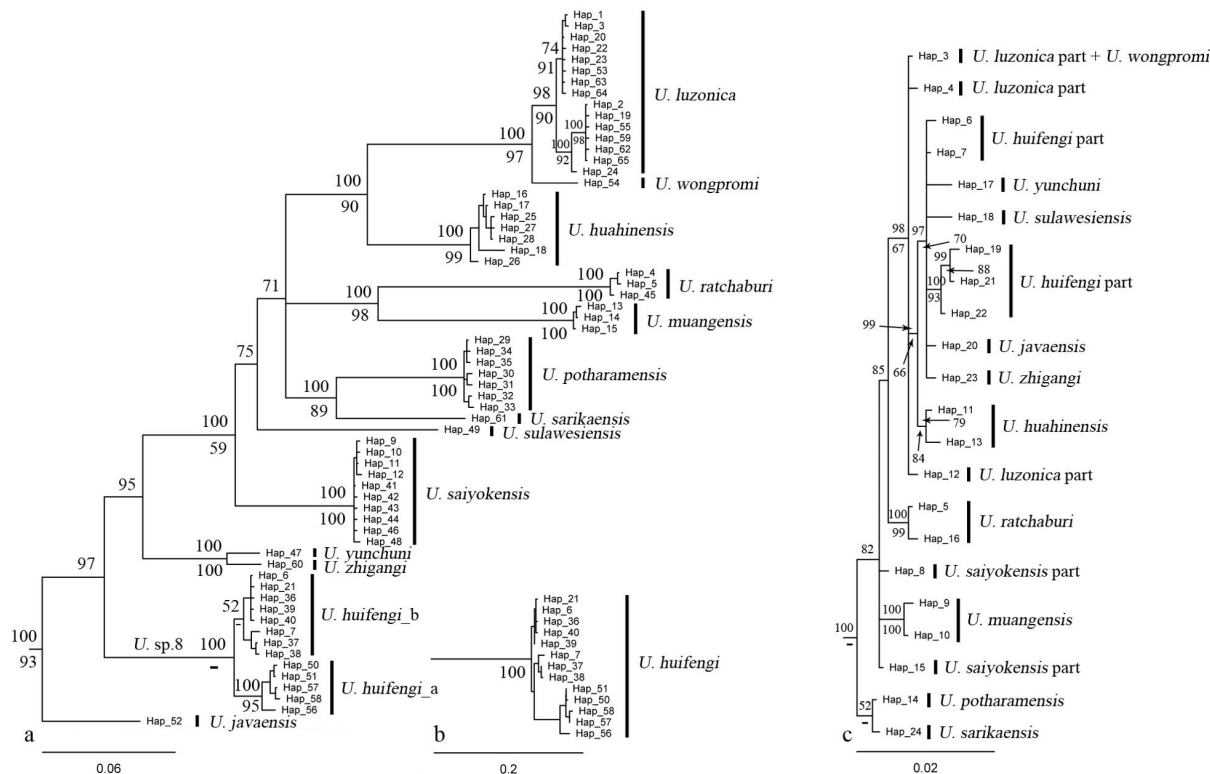

**Figure S3. Results of bPTP species delimitation analysis based on COI gene tree derived from likelihood analysis (left) and Bayesian analysis (right). BS values are provided near the nodes**

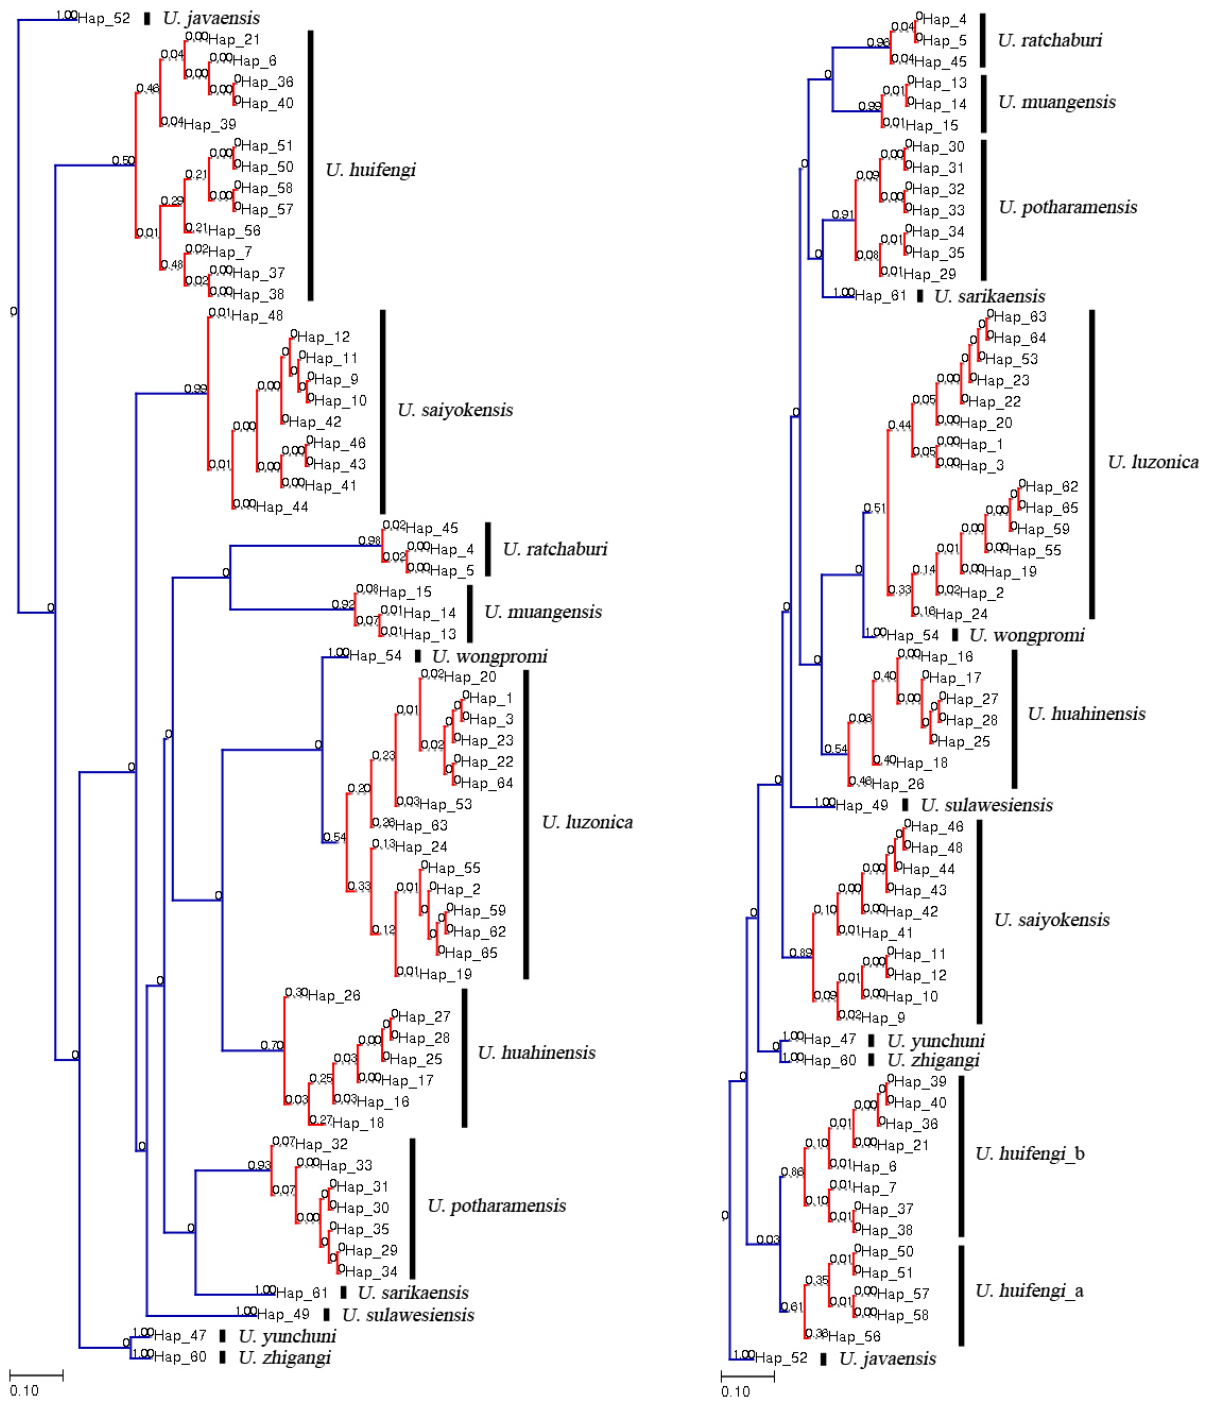

**Figure S4. Results of bPTP species delimitation analysis based on 28S gene tree derived from Bayesian analysis (above) and likelihood analysis (below). BS values are provided near the nodes**

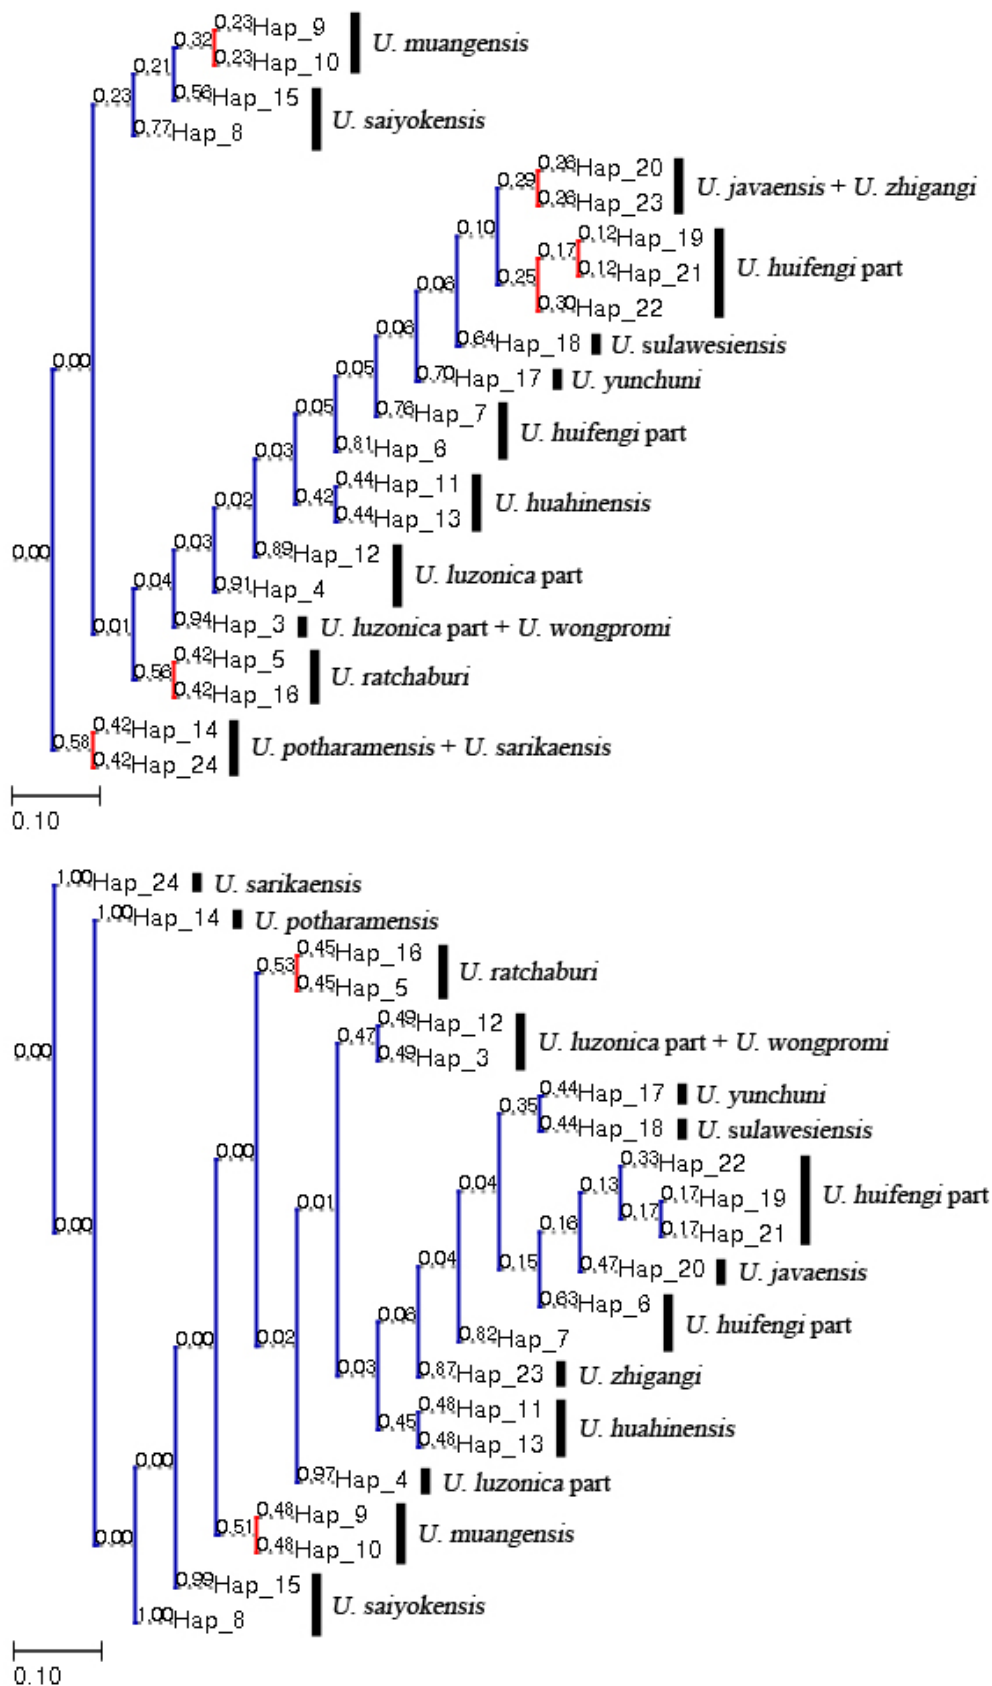

**Figure S5. Results of GMYC species delimitation analysis based on COI gene tree. The blue line indicates the maximum-likelihood transition point where the branching rates switch from inter-specific to intra-specific events, as estimated by the GMYC model. Below are lineages-through-time plot (left) and single-threshold GMYC likelihood profile plot (right)**

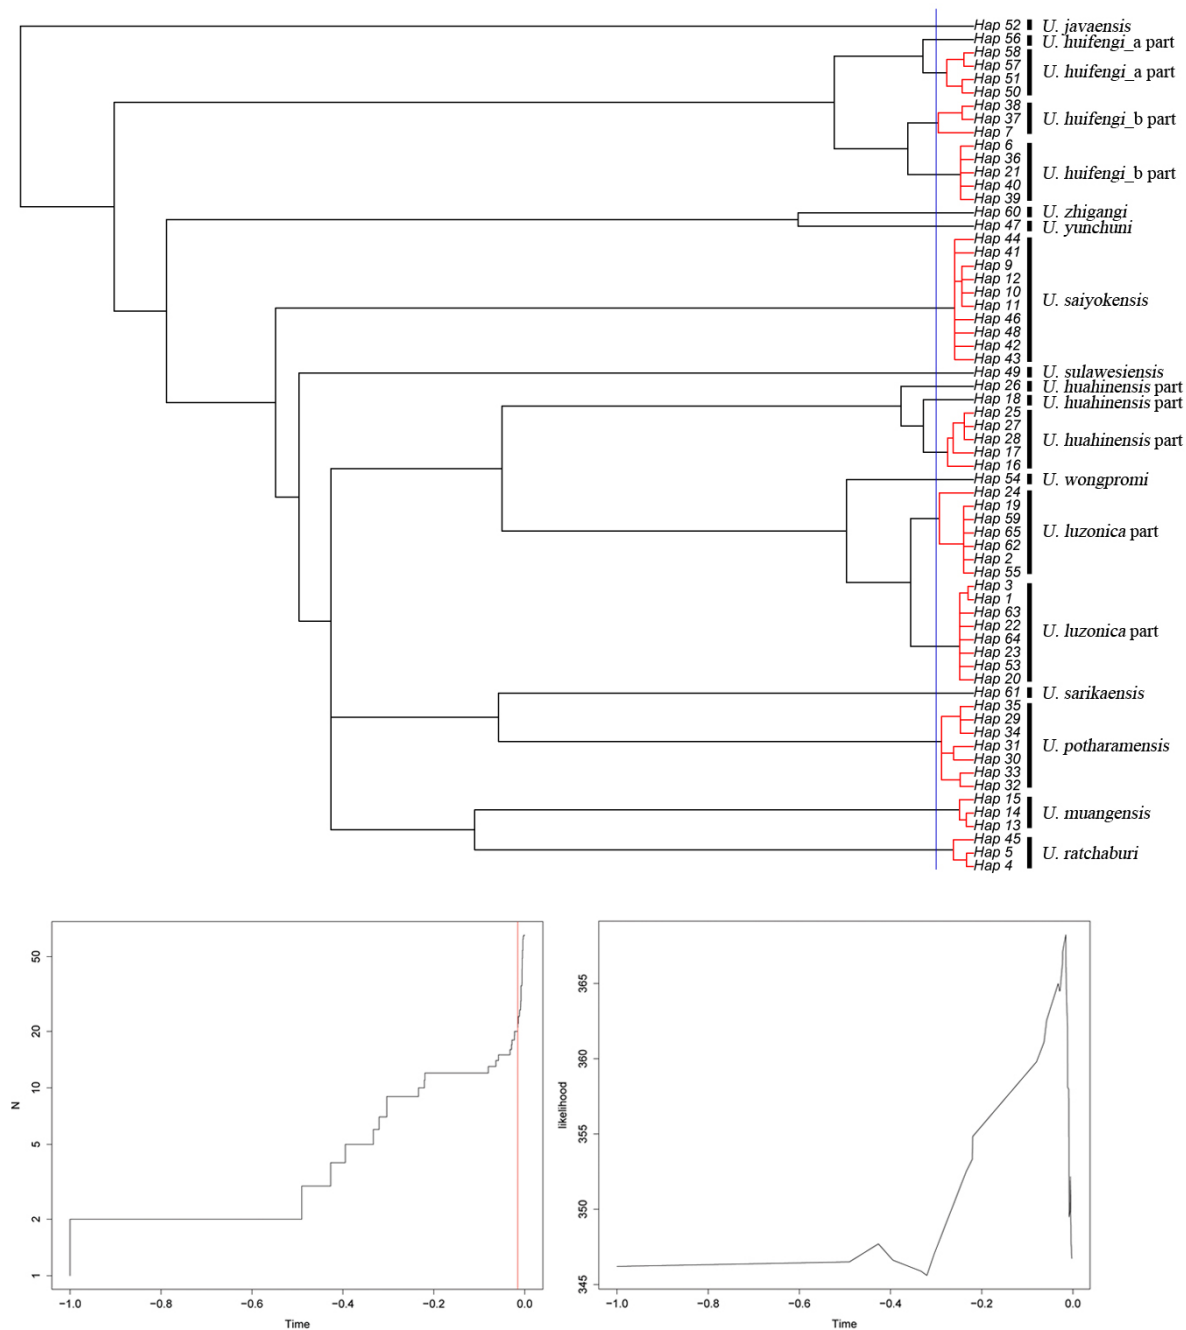

**Table S1. Sampling localities and GenBank accession numbers**

| Species            | Sample code | Site Number                                                                                                                             | Locality                                                                                                                                                                    | COI      | 28S      |
|--------------------|-------------|-----------------------------------------------------------------------------------------------------------------------------------------|-----------------------------------------------------------------------------------------------------------------------------------------------------------------------------|----------|----------|
| <i>U. luzonica</i> | 001_1       | 1                                                                                                                                       | ID 003–004, H. Zhao, Z. Yao, 2014-VIII-12, Indonesia, Central Kalimantan, Tumbang Tahai, near Rungan Sari Hotel, 1°58.241'S, 113°44.712'E, elevation 3 m                    | KX980548 | KX980764 |
|                    | 001_2       |                                                                                                                                         |                                                                                                                                                                             | KX980547 | KX980763 |
|                    | 001_3       |                                                                                                                                         |                                                                                                                                                                             | KX980549 | KX980765 |
|                    | 001_4       |                                                                                                                                         |                                                                                                                                                                             | KX980550 | KX980766 |
|                    | 001_5       |                                                                                                                                         |                                                                                                                                                                             | KX980551 | KX980767 |
|                    | 001_6       |                                                                                                                                         |                                                                                                                                                                             | KX980552 | KX980768 |
|                    | 001_7       |                                                                                                                                         |                                                                                                                                                                             | KX980553 | KX980769 |
|                    | 001_8       |                                                                                                                                         |                                                                                                                                                                             | KX980554 | KX980770 |
|                    | 001_9       |                                                                                                                                         |                                                                                                                                                                             | KX980555 | KX980771 |
|                    | 001_10      |                                                                                                                                         |                                                                                                                                                                             | KX980556 | KX980772 |
|                    | 019_1       | 2                                                                                                                                       | ID 006–007, H. Zhao, Z. Yao, 2014-VIII-13, Indonesia, Central Kalimantan, Tumbang Tahai, Batu Banama, 1°59.312'S, 113°45.328'E, elevation 26 m                              | KX980697 | KX980913 |
|                    | 019_2       |                                                                                                                                         |                                                                                                                                                                             | KX980698 | KX980914 |
|                    | 019_3       |                                                                                                                                         |                                                                                                                                                                             | KX980699 | KX980915 |
|                    | 019_4       |                                                                                                                                         |                                                                                                                                                                             | KX980700 | KX980916 |
|                    | 019_5       |                                                                                                                                         |                                                                                                                                                                             | KX980701 | KX980917 |
|                    | 035_1       | 3                                                                                                                                       | ID 018–020, H. Zhao, Z. Yao, 2014-VIII-16, Indonesia, East Kalimantan, Penajam, Camp of International Timber Corp. of Indonesia, 1°5'17.49"S, 116°41'5.63"E, elevation 64 m | KX980746 | KX980962 |
|                    | 007_1       | 4                                                                                                                                       | Li-TW 008–009, S. Li, 2013-VI-26, China, Taiwan, Pingdong County, Kending, 21°57'25.15"N, 120°49'06.29"E, elevation 221 m                                                   | KX980607 | KX980823 |
|                    | 007_2       |                                                                                                                                         |                                                                                                                                                                             | KX980608 | KX980824 |
|                    | 007_3       |                                                                                                                                         |                                                                                                                                                                             | KX980609 | KX980825 |
|                    | 007_4       |                                                                                                                                         |                                                                                                                                                                             | KX980610 | KX980826 |
|                    | 007_5       |                                                                                                                                         |                                                                                                                                                                             | KX980611 | KX980827 |
|                    | 007_6       |                                                                                                                                         |                                                                                                                                                                             | KX980612 | KX980828 |
|                    | 007_7       |                                                                                                                                         |                                                                                                                                                                             | KX980613 | KX980829 |
|                    | 007_8       |                                                                                                                                         |                                                                                                                                                                             | KX980614 | KX980830 |
|                    | 007_9       |                                                                                                                                         |                                                                                                                                                                             | KX980615 | KX980831 |
|                    | 007_10      |                                                                                                                                         |                                                                                                                                                                             | KX980616 | KX980832 |
|                    | 009_1       | 5                                                                                                                                       | Li-TW 015–022, S. Li, 2013-VI-29, China, Taiwan, Gaoxiang, Shou Mountain, entrance of cave without a name, 22°39'N, 120°16'E                                                | KX980627 | KX980843 |
|                    | 009_2       |                                                                                                                                         |                                                                                                                                                                             | KX980628 | KX980844 |
|                    | 009_3       |                                                                                                                                         |                                                                                                                                                                             | KX980629 | KX980845 |
|                    | 009_4       |                                                                                                                                         |                                                                                                                                                                             | KX980630 | KX980846 |
|                    | 009_5       |                                                                                                                                         |                                                                                                                                                                             | KX980631 | KX980847 |
|                    | 009_6       |                                                                                                                                         |                                                                                                                                                                             | KX980632 | KX980848 |
| 009_7              | KX980633    |                                                                                                                                         |                                                                                                                                                                             | KX980849 |          |
| 009_8              | KX980634    |                                                                                                                                         |                                                                                                                                                                             | KX980850 |          |
| 009_9              | KX980635    |                                                                                                                                         |                                                                                                                                                                             | KX980851 |          |
| 009_10             | KX980636    |                                                                                                                                         |                                                                                                                                                                             | KX980852 |          |
| 016_1              | 6           | 004-005, H. Zhao, 2013-XI-30, Forest face to Tea factory near Morne Blanc in Mahe, Seychelles, 4°39.724'S, 55°26.272'E, elevation 421 m | KX980682                                                                                                                                                                    | KX980898 |          |
| 016_2              |             |                                                                                                                                         | KX980683                                                                                                                                                                    | KX980899 |          |
| 016_3              |             |                                                                                                                                         | KX980684                                                                                                                                                                    | KX980900 |          |
| 016_4              |             |                                                                                                                                         | KX980685                                                                                                                                                                    | KX980901 |          |
| 016_5              |             |                                                                                                                                         | KX980686                                                                                                                                                                    | KX980902 |          |
| 041_1              | 7           | H. Zhao, 2013-XII-03, Costal forest of Jardin Marron in Praslin, Seychelles, 4°17.929'S, 55°42.820'E, elevation 18 m                    | KX980752                                                                                                                                                                    | KX980968 |          |
| 042_1              | 8           | H. Zhao, 2013-XII-07, Leaf litter in west costal forest in Mahe, Seychelles, 4°44.094'S, 55°29.612'E, elevation 27 m                    | KX980753                                                                                                                                                                    | KX980969 |          |



|                       |       |    |                                                                                                                                                                                                     |          |          |
|-----------------------|-------|----|-----------------------------------------------------------------------------------------------------------------------------------------------------------------------------------------------------|----------|----------|
|                       | 017_1 | 9  | SR 061–065, Z. Yao, Q. Zhao, 2014-X-7, Sri Lanka, Central Province, Kandy District, Peraderiya Town, Royal Botanic Gardens, 7°16'31.3"N, 80°35'42.7"E, elevation 484 m                              | KX980687 | KX980903 |
|                       | 017_2 |    |                                                                                                                                                                                                     | KX980688 | KX980904 |
|                       | 017_3 |    |                                                                                                                                                                                                     | KX980689 | KX980905 |
|                       | 017_4 |    |                                                                                                                                                                                                     | KX980690 | KX980906 |
|                       | 017_5 |    |                                                                                                                                                                                                     | KX980691 | KX980907 |
|                       | 024_1 | 10 | SR 010–011, Z. Yao, Q. Zhao, 2014-IX-25, Sri Lanka, Western Province, Colombo District, Maniyangama, Avissawella Town, Mahawafa Village, by the roadside, 6°57'26.0"N, 80°13'54.6"E, elevation 41 m | KX980722 | KX980938 |
|                       | 024_2 |    |                                                                                                                                                                                                     | KX980723 | KX980939 |
|                       | 024_3 |    |                                                                                                                                                                                                     | KX980724 | KX980940 |
|                       | 032_1 | 11 | SR 012–014, Z. Yao, Q. Zhao, 2014-IX-26, Sri Lanka, Western Province, Colombo District, Maniyangama, Avissawella Town, Mahawafa Village, Mahawafa Hill, 6°55'55.3"N, 80°14'40.6"E, elevation 38 m   | KX980740 | KX980956 |
|                       | 030_1 | 12 | ID 057, H. Zhao, Z. Yao, 2014-VIII-22, Indonesia, South Sulawesi, Maros, Samanggi Village, Balang Ajia Orchard, near entrance of Cave 1 without a name, 5°3'2.76"S, 119°41'9.40"E, elevation 50 m   | KX980737 | KX980953 |
|                       | 030_2 |    |                                                                                                                                                                                                     | KX980738 | KX980954 |
|                       | 040_1 | 13 | H. Zhao, 2014-I-15, Indonesia, Sumatra, North Sumatra Province, Lake Toba, Samosir island, 02°42.858' N, 98°48.312'E, elevation 934 m                                                               | KX980751 | KX980967 |
|                       | 405_1 | 14 | 047–048, H. Zhao, Y. Li, 2015-IV-18, Fiji, Viti levu, Ba Province, Lautoka, Abaca vill., a forest in Koroyanitu National Heritage park, 17.57842°S, 177.96129°E, elevation 763 m                    | KX980754 | KX980970 |
|                       | 405_2 |    |                                                                                                                                                                                                     | KX980755 | KX980971 |
|                       | 406_1 | 15 | 063–064, H. Zhao, Y. Li, 2015-IV-21, Fiji, Viti levu, Suva, forest of Colo-i-suva forest park, 18.11344°S, 178.33635°E, elevation 26 m                                                              | KX980756 | KX980972 |
|                       | 406_2 |    |                                                                                                                                                                                                     | KX980757 | KX980973 |
|                       | 407_1 | 16 | Phi210, Huber B.A., 2014-II-28 Philippines, Luzon, near Olangapo, along river near Pamulaklakin Forest Trail, 14.7980°N, 121.3380°E                                                                 | KX980758 | KX980974 |
|                       | 408_1 | 17 | Phi252, B.A. Huber, 2014-II-16, Philippines, Mindanao, Barangay San Jose, entrance of Blue Water Cave, 7.7060°N, 125.0320°E                                                                         | KX980759 | KX980975 |
| <i>U. wongpromi</i>   | 031_2 | 18 | 056–058, H. Zhao, Y. Li, Z. Chen, 2014-X-17, Thailand, Phitsanulok Province, Nakhonthai Dist, Ban Kaset Sut Vill., entrance of Tham Than La Cave, 16°54.816'N, 100°43.227'E                         | KX980739 | KX980955 |
|                       | 034_1 | 19 | 066–067, H. Zhao, Y. Li, Z. Chen, 2014-X-18, Thailand, Phitsanulok Province, Nakhonthai Dist., Ban Tham Phrik Vill., entrance of Taraswan Cave, 16°55.220'N, 100°43.19'E, elevation 460m            | KX980744 | KX980960 |
|                       | 034_2 |    |                                                                                                                                                                                                     | KX980745 | KX980961 |
|                       | 039_1 | 20 | 130–139, 140–141, H. Zhao, Y. Li, Z. Chen, 2014-X-28, Thailand, Ranong Province, Kraburi Dist. entrance of Phra Kha Yang Cave, 10°19.568'N, 98°45.908'E, elevation 6 m                              | KX980750 | KX980966 |
| <i>U. huahinensis</i> | 006_1 | 21 | 148–149, H. Zhao, Y. Li, Z. Chen, 2014-X-30, Thailand, Prachuap Kiri Khan Province, Hua Hin Dist. Nong Phlap Subdist., entrance of Dao Cave,                                                        | KX980597 | KX980813 |
|                       | 006_2 |    |                                                                                                                                                                                                     | KX980598 | KX980814 |
|                       | 006_3 |    |                                                                                                                                                                                                     | KX980599 | KX980815 |
|                       | 006_4 |    |                                                                                                                                                                                                     | KX980600 | KX980816 |

|                       |        |    |                                                                                                                                                                                                          |          |          |
|-----------------------|--------|----|----------------------------------------------------------------------------------------------------------------------------------------------------------------------------------------------------------|----------|----------|
|                       | 006_5  |    | 12°35.449'N, 99°43.692'E, elevation 123 m                                                                                                                                                                | KX980601 | KX980817 |
|                       | 006_6  |    |                                                                                                                                                                                                          | KX980602 | KX980818 |
|                       | 006_7  |    |                                                                                                                                                                                                          | KX980603 | KX980819 |
|                       | 006_8  |    |                                                                                                                                                                                                          | KX980604 | KX980820 |
|                       | 006_9  |    |                                                                                                                                                                                                          | KX980605 | KX980821 |
|                       | 006_10 |    |                                                                                                                                                                                                          | KX980606 | KX980822 |
|                       | 010_1  | 22 | 150–154, H. Zhao, Y. Li, Z. Chen, 2014-X-30, Thailand, Prachuap Kiri Khan Province, Hua Hin Dist. Nong Phlap Subdist. entrances of Laplae Cave & Kailone Cave, 12°36.255'N, 99°43.341'E, elevation 175 m | KX980637 | KX980853 |
|                       | 010_2  |    |                                                                                                                                                                                                          | KX980638 | KX980854 |
|                       | 010_3  |    |                                                                                                                                                                                                          | KX980639 | KX980855 |
|                       | 010_4  |    |                                                                                                                                                                                                          | KX980640 | KX980856 |
|                       | 010_5  |    |                                                                                                                                                                                                          | KX980641 | KX980857 |
|                       | 010_6  |    |                                                                                                                                                                                                          | KX980642 | KX980858 |
|                       | 010_7  |    |                                                                                                                                                                                                          | KX980643 | KX980859 |
|                       | 010_8  |    |                                                                                                                                                                                                          | KX980644 | KX980860 |
|                       | 010_9  |    |                                                                                                                                                                                                          | KX980645 | KX980861 |
|                       | 010_10 |    |                                                                                                                                                                                                          | KX980646 | KX980862 |
| <i>U. ratchaburi</i>  | 002_1  | 23 | 087, H. Zhao, Y. Li, Z. Chen, 2014-X-21, Thailand, Ratchaburi Province, Muang Dist. Koh Phalapphla Vill., entrance of Tham Phraya Prap Cave, 13°35.018'N, 99°45.297'E                                    | KX980557 | KX980773 |
|                       | 002_2  |    |                                                                                                                                                                                                          | KX980558 | KX980774 |
|                       | 002_3  |    |                                                                                                                                                                                                          | KX980559 | KX980775 |
|                       | 002_4  |    |                                                                                                                                                                                                          | KX980560 | KX980776 |
|                       | 002_5  |    |                                                                                                                                                                                                          | KX980561 | KX980777 |
|                       | 002_6  |    |                                                                                                                                                                                                          | KX980562 | KX980778 |
|                       | 002_7  |    |                                                                                                                                                                                                          | KX980563 | KX980779 |
|                       | 002_8  |    |                                                                                                                                                                                                          | KX980564 | KX980780 |
|                       | 002_9  |    |                                                                                                                                                                                                          | KX980565 | KX980781 |
|                       | 002_10 |    |                                                                                                                                                                                                          | KX980566 | KX980782 |
|                       | 022_1  | 24 | 088–090, H. Zhao, Y. Li, Z. Chen, 2014-X-21, Thailand, Ratchaburi Province, Muang Dist., Koh Phalapphla Vill., entrance of Tham Wat Takaeng Cave, 13°35.226'N, 99°45.525'E                               | KX980712 | KX980928 |
|                       | 022_2  |    |                                                                                                                                                                                                          | KX980713 | KX980929 |
|                       | 022_3  |    |                                                                                                                                                                                                          | KX980714 | KX980930 |
|                       | 022_4  |    |                                                                                                                                                                                                          | KX980715 | KX980931 |
|                       | 022_5  |    |                                                                                                                                                                                                          | KX980716 | KX980932 |
| <i>U. muangensis</i>  | 005_1  | 25 | 155–159, H. Zhao, Y. Li, Z. Chen, 2014-X-31, Thailand, Ratchaburi Province, Maung Dist. Thuang luang Subdist. entrance of Sawang Cave, 13°28.014'N, 99°44.014'E, elevation 44 m                          | KX980587 | KX980803 |
|                       | 005_2  |    |                                                                                                                                                                                                          | KX980588 | KX980804 |
|                       | 005_3  |    |                                                                                                                                                                                                          | KX980589 | KX980805 |
|                       | 005_4  |    |                                                                                                                                                                                                          | KX980590 | KX980806 |
|                       | 005_5  |    |                                                                                                                                                                                                          | KX980591 | KX980807 |
|                       | 005_6  |    |                                                                                                                                                                                                          | KX980592 | KX980808 |
|                       | 005_7  |    |                                                                                                                                                                                                          | KX980593 | KX980809 |
|                       | 005_8  |    |                                                                                                                                                                                                          | KX980594 | KX980810 |
|                       | 005_9  |    |                                                                                                                                                                                                          | KX980595 | KX980811 |
|                       | 005_10 |    |                                                                                                                                                                                                          | KX980596 | KX980812 |
| <i>U. saiyokensis</i> | 004_1  | 26 | 165–167, H. Zhao, Y. Li, Z. Chen, 2014-XI-2, Thailand, Kanchanaburi Province, Sai Yok Dist. Wang Krachae Subdist., entrance of cave without a name, 14°11.429'N, 99°01.594'E                             | KX980577 | KX980793 |
|                       | 004_2  |    |                                                                                                                                                                                                          | KX980578 | KX980794 |
|                       | 004_3  |    |                                                                                                                                                                                                          | KX980579 | KX980795 |
|                       | 004_4  |    |                                                                                                                                                                                                          | KX980580 | KX980796 |
|                       | 004_5  |    |                                                                                                                                                                                                          | KX980581 | KX980797 |
|                       | 004_6  |    |                                                                                                                                                                                                          | KX980582 | KX980798 |
|                       | 004_7  |    |                                                                                                                                                                                                          | KX980583 | KX980799 |
|                       | 004_8  |    |                                                                                                                                                                                                          | KX980584 | KX980800 |
|                       | 004_9  |    |                                                                                                                                                                                                          | KX980585 | KX980801 |
|                       | 004_10 |    |                                                                                                                                                                                                          | KX980586 | KX980802 |
|                       | 018_1  | 27 | 168–170, H. Zhao, Y. Li, Z. Chen, 2014-XI-2, Thailand, Kanchanaburi Province, Sai Yok Dist. Wang Krachae Subdist. entrance of cave without a name, 14°11.400'N, 99°01.555'E                              | KX980692 | KX980908 |
|                       | 018_2  |    |                                                                                                                                                                                                          | KX980693 | KX980909 |
|                       | 018_3  |    |                                                                                                                                                                                                          | KX980694 | KX980910 |
|                       | 018_4  |    |                                                                                                                                                                                                          | KX980695 | KX980911 |
|                       | 018_5  |    |                                                                                                                                                                                                          | KX980696 | KX980912 |

|                         |                         |          |                                                                                                                                                                                            |                                                                                                                                                               |                                                                                                                                                                                         |          |
|-------------------------|-------------------------|----------|--------------------------------------------------------------------------------------------------------------------------------------------------------------------------------------------|---------------------------------------------------------------------------------------------------------------------------------------------------------------|-----------------------------------------------------------------------------------------------------------------------------------------------------------------------------------------|----------|
|                         | 021_1                   | 28       | 162, H. Zhao, Y. Li, Z. Chen, 2014-XI-1, Thailand, Kanchanaburi Province, Sai Yok Dist. Wang Krachae Subdist., entrance of cave without a name, 14°12.219' N, 99°01.666'E, elevation 325 m | KX980707                                                                                                                                                      | KX980923                                                                                                                                                                                |          |
|                         | 021_2                   |          |                                                                                                                                                                                            | KX980708                                                                                                                                                      | KX980924                                                                                                                                                                                |          |
|                         | 021_3                   |          |                                                                                                                                                                                            | KX980709                                                                                                                                                      | KX980925                                                                                                                                                                                |          |
|                         | 021_4                   |          |                                                                                                                                                                                            | KX980710                                                                                                                                                      | KX980926                                                                                                                                                                                |          |
|                         | 021_5                   |          |                                                                                                                                                                                            | KX980711                                                                                                                                                      | KX980927                                                                                                                                                                                |          |
|                         | 023_1                   | 29       | 164, H. Zhao, Y. Li, Z. Chen, 2014-XI-1, Thailand, Kanchanaburi Province, Sai Yok Dist. Wang Krachae Subdist., entrance of cave without a name, 14°12.127'N, 99°01.195'E, elevation 438 m  | KX980717                                                                                                                                                      | KX980933                                                                                                                                                                                |          |
|                         | 023_2                   |          |                                                                                                                                                                                            | KX980718                                                                                                                                                      | KX980934                                                                                                                                                                                |          |
|                         | 023_3                   |          |                                                                                                                                                                                            | KX980719                                                                                                                                                      | KX980935                                                                                                                                                                                |          |
|                         | 023_4                   |          |                                                                                                                                                                                            | KX980720                                                                                                                                                      | KX980936                                                                                                                                                                                |          |
|                         | 023_5                   |          |                                                                                                                                                                                            | KX980721                                                                                                                                                      | KX980937                                                                                                                                                                                |          |
|                         | 026_1                   | 30       | 163, H. Zhao, Y. Li, Z. Chen, 2014-XI-1, Thailand, Kanchanaburi Province, Sai Yok Dist. Wang Krachae Subdist., entrance of cave without a name, 14°12.182'N, 99°01.416'E, elevation 342 m  | KX980727                                                                                                                                                      | KX980943                                                                                                                                                                                |          |
|                         | 026_2                   |          |                                                                                                                                                                                            | KX980728                                                                                                                                                      | KX980944                                                                                                                                                                                |          |
|                         | 026_3                   |          |                                                                                                                                                                                            | KX980729                                                                                                                                                      | KX980945                                                                                                                                                                                |          |
|                         | <i>U. potharamensis</i> | 011_1    | 31                                                                                                                                                                                         | 082, H. Zhao, Y. Li, Z. Chen, 2014-X-21, Thailand, Ratchaburi Province, Potharam Dist. Nang Kao Subdist., entrance of Tham Nam Cave, 13°41.860'N, 99°45.415'E | KX980647                                                                                                                                                                                | KX980863 |
|                         |                         | 011_2    |                                                                                                                                                                                            |                                                                                                                                                               | KX980648                                                                                                                                                                                | KX980864 |
| 011_3                   |                         | KX980649 |                                                                                                                                                                                            |                                                                                                                                                               | KX980865                                                                                                                                                                                |          |
| 011_4                   |                         | KX980650 |                                                                                                                                                                                            |                                                                                                                                                               | KX980866                                                                                                                                                                                |          |
| 011_5                   |                         | KX980651 |                                                                                                                                                                                            |                                                                                                                                                               | KX980867                                                                                                                                                                                |          |
| 011_6                   |                         | KX980652 |                                                                                                                                                                                            |                                                                                                                                                               | KX980868                                                                                                                                                                                |          |
| 011_7                   |                         | KX980653 |                                                                                                                                                                                            |                                                                                                                                                               | KX980869                                                                                                                                                                                |          |
| 011_8                   |                         | KX980654 |                                                                                                                                                                                            |                                                                                                                                                               | KX980870                                                                                                                                                                                |          |
| 011_9                   |                         | KX980655 |                                                                                                                                                                                            |                                                                                                                                                               | KX980871                                                                                                                                                                                |          |
| 011_10                  |                         | KX980656 |                                                                                                                                                                                            |                                                                                                                                                               | KX980872                                                                                                                                                                                |          |
| <i>U. sarikaensis</i>   | 038_1                   | 32       | 083–086, H. Zhao, Y. Li, Z. Chen, 2014-X-21, Thailand, Ratchaburi Province, Muang Dist., Tham Sen Subdist., entrance of Tham Sarika Cave, 13°29.773' N, 99°44.229'E, elevation 48 m        | KX980749                                                                                                                                                      | KX980965                                                                                                                                                                                |          |
| <i>U. sulawesiensis</i> | 027_1                   | 33       | ID 063–064, H. Zhao, Z. Yao, 2014-VIII-23, Indonesia, South Sulawesi, Maros, entrance of cave without a name, 4°52.344'S, 119°53.858'E, elevation 417 m                                    | KX980730                                                                                                                                                      | KX980946                                                                                                                                                                                |          |
|                         | 027_2                   |          |                                                                                                                                                                                            | KX980731                                                                                                                                                      | KX980947                                                                                                                                                                                |          |
|                         | 036_1                   | 34       | ID 060, H. Zhao, Z. Yao, 2014-VIII-23, Indonesia, South Sulawesi, Maros, Cenrana Village, Benteng Orchard, entrance of Gua (= Cave) Liang Gose, 04°56.304'S, 119°50.341'E, elevation 355 m | KX980747                                                                                                                                                      | KX980963                                                                                                                                                                                |          |
| <i>U. huiifengi</i>     | 003_1                   | 35       | Yao-ID 038–041, Z. Yao, 2014-V-18, Indonesia, Sumatra, West Sumatra Province, Bukittinggi, entrance of Kalam Cave, 00°12.275'S, 100°23.475' E, elevation 874 m                             | KX980567                                                                                                                                                      | KX980783                                                                                                                                                                                |          |
|                         | 003_2                   |          |                                                                                                                                                                                            | KX980568                                                                                                                                                      | KX980784                                                                                                                                                                                |          |
|                         | 003_3                   |          |                                                                                                                                                                                            | KX980569                                                                                                                                                      | KX980785                                                                                                                                                                                |          |
|                         | 003_5                   |          |                                                                                                                                                                                            | KX980571                                                                                                                                                      | KX980787                                                                                                                                                                                |          |
|                         | 003_6                   |          |                                                                                                                                                                                            | KX980572                                                                                                                                                      | KX980788                                                                                                                                                                                |          |
|                         | 003_7                   |          |                                                                                                                                                                                            | KX980573                                                                                                                                                      | KX980789                                                                                                                                                                                |          |
|                         | 003_8                   |          |                                                                                                                                                                                            | KX980574                                                                                                                                                      | KX980790                                                                                                                                                                                |          |
|                         | 003_9                   |          |                                                                                                                                                                                            | KX980575                                                                                                                                                      | KX980791                                                                                                                                                                                |          |
|                         | 003_10                  |          |                                                                                                                                                                                            | KX980576                                                                                                                                                      | KX980792                                                                                                                                                                                |          |
|                         | 008_1                   |          |                                                                                                                                                                                            | 36                                                                                                                                                            | H. Zhao, 2014-I-12, Indonesia, Sumatra, West Sumatra Province, Kab Agam Kecamatan Matur, Kanagarian Matuailia, entrance of Batang lawang Cave, 0°15.739'S, 100°18.491'E, elevation 761m | KX980617 |
|                         | 008_2                   | KX980618 | KX980834                                                                                                                                                                                   |                                                                                                                                                               |                                                                                                                                                                                         |          |
|                         | 008_3                   | KX980619 | KX980835                                                                                                                                                                                   |                                                                                                                                                               |                                                                                                                                                                                         |          |
|                         | 008_4                   | KX980620 | KX980836                                                                                                                                                                                   |                                                                                                                                                               |                                                                                                                                                                                         |          |
|                         | 008_5                   | KX980621 | KX980837                                                                                                                                                                                   |                                                                                                                                                               |                                                                                                                                                                                         |          |
|                         | 008_6                   | KX980622 | KX980838                                                                                                                                                                                   |                                                                                                                                                               |                                                                                                                                                                                         |          |
|                         | 008_7                   | KX980623 | KX980839                                                                                                                                                                                   |                                                                                                                                                               |                                                                                                                                                                                         |          |
|                         | 008_8                   | KX980624 | KX980840                                                                                                                                                                                   |                                                                                                                                                               |                                                                                                                                                                                         |          |

|                       |          |    |                                                                                                                                                                                                 |          |          |
|-----------------------|----------|----|-------------------------------------------------------------------------------------------------------------------------------------------------------------------------------------------------|----------|----------|
|                       | 008_9    |    |                                                                                                                                                                                                 | KX980625 | KX980841 |
|                       | 008_10   |    |                                                                                                                                                                                                 | KX980626 | KX980842 |
|                       | 012_1    | 37 | H. Zhao, 2014-I-10, Indonesia, Sumatra, West Sumatra Province, Bukittinggi, Fort de Kock, entrance of cave without a name, 0°17.982'S, 100°22.090'E, elevation 940 m                            | KX980657 | KX980873 |
|                       | 012_2    |    |                                                                                                                                                                                                 | KX980658 | KX980874 |
|                       | 012_3    |    |                                                                                                                                                                                                 | KX980659 | KX980875 |
|                       | 012_4    |    |                                                                                                                                                                                                 | KX980660 | KX980876 |
|                       | 012_5    |    |                                                                                                                                                                                                 | KX980661 | KX980877 |
|                       | 012_6    |    |                                                                                                                                                                                                 | KX980662 | KX980878 |
|                       | 012_7    |    |                                                                                                                                                                                                 | KX980663 | KX980879 |
|                       | 012_8    |    |                                                                                                                                                                                                 | KX980664 | KX980880 |
|                       | 012_9    |    |                                                                                                                                                                                                 | KX980665 | KX980881 |
|                       | 012_10   |    |                                                                                                                                                                                                 | KX980666 | KX980882 |
|                       | 013_1    | 38 | H. Zhao, 2014-I-11, Indonesia, Sumatra, West Sumatra Province, Kab Agam TaBik Simarasok Village, entrance of Jorong Koto Tuo Cave, 0°14.901'S, 100°28.992'E, elevation 714 m                    | KX980667 | KX980883 |
|                       | 013_2    |    |                                                                                                                                                                                                 | KX980668 | KX980884 |
|                       | 013_3    |    |                                                                                                                                                                                                 | KX980669 | KX980885 |
|                       | 013_4    |    |                                                                                                                                                                                                 | KX980670 | KX980886 |
|                       | 013_5    |    |                                                                                                                                                                                                 | KX980671 | KX980887 |
|                       | 014_1    | 39 | Yao-ID 012–016, Z. Yao, 2014-V-12, Indonesia, Sumatra, West Sumatra Province, Bukittinggi, entrance of Tarang Cave, 00°12.653'S, 100°24.977' E, elevation 877 m                                 | KX980672 | KX980888 |
|                       | 014_2    |    |                                                                                                                                                                                                 | KX980673 | KX980889 |
|                       | 014_3    |    |                                                                                                                                                                                                 | KX980674 | KX980890 |
|                       | 014_4    |    |                                                                                                                                                                                                 | KX980675 | KX980891 |
|                       | 014_5    |    |                                                                                                                                                                                                 | KX980676 | KX980892 |
|                       | 015_1    | 40 | H. Zhao, 2014-I-12, Indonesia, Sumatra, West Sumatra Province, Bukittinggi, entrance of Jenjang Seribu Cave, 0°18.104'S, 100°21.335'E, elevation 815 m                                          | KX980677 | KX980893 |
|                       | 015_2    |    |                                                                                                                                                                                                 | KX980678 | KX980894 |
|                       | 015_3    |    |                                                                                                                                                                                                 | KX980679 | KX980895 |
|                       | 015_4    |    |                                                                                                                                                                                                 | KX980680 | KX980896 |
|                       | 015_5    |    |                                                                                                                                                                                                 | KX980681 | KX980897 |
|                       | 020_1    | 41 | H. Zhao, 2014-I-11, Indonesia, Sumatra, West Sumatra Province, Bukittinggi, entrance of Japanese Cave, 0°18.458'S, 100°21.933'E, elevation 906 m                                                | KX980702 | KX980918 |
|                       | 020_2    |    |                                                                                                                                                                                                 | KX980703 | KX980919 |
|                       | 020_3    |    |                                                                                                                                                                                                 | KX980704 | KX980920 |
|                       | 020_4    |    |                                                                                                                                                                                                 | KX980705 | KX980921 |
|                       | 020_5    |    |                                                                                                                                                                                                 | KX980706 | KX980922 |
|                       | 028_1    | 42 | Yao-ID 061–065, Z. Yao, 2014-V-27, Indonesia, Sumatra, West Sumatra Province, Sijunjung, Padang Sibusuk Village, entrance of Bukit Ponggang Cave, 00°44.245'S, 100°50.330'E, elevation 278 m    | KX980732 | KX980948 |
|                       | 028_2    |    |                                                                                                                                                                                                 | KX980733 | KX980949 |
|                       | 028_3    |    |                                                                                                                                                                                                 | KX980734 | KX980950 |
|                       | 033_1    | 43 | Yao-ID 052–054, Z. Yao, 2014-V-24, Indonesia, Sumatra, Jambi Province, Kerinci, Talang Cindang, near river in a village, 02°04.834'S, 101°22.448'E, elevation 1054 m                            | KX980741 | KX980957 |
|                       | 033_2    |    |                                                                                                                                                                                                 | KX980742 | KX980958 |
|                       | 033_3    |    |                                                                                                                                                                                                 | KX980743 | KX980959 |
| <i>U. javaensis</i>   | 029_1    | 44 | ID 072–075, H. Zhao, Z. Yao, 2014-VIII-27, Indonesia, Java, Bantul, Mangunan Village, entrance of Gua (= Cave) Gajah, 07°56.662'S, 110°26.404'E, elevation 234 m                                | KX980735 | KX980951 |
|                       | 029_2    |    |                                                                                                                                                                                                 | KX980736 | KX980952 |
| <i>U. yunchuni</i>    | 025_1    | 45 | 108–110, H. Zhao, Y. Li, Z. Chen, 2014-X-25, Thailand, Krabi Province, Muang Dist., Ban Chong Plee Vill., entrance of cave without a name, 08°05.122'N, 98°51.223'E, elevation 442 m            | KX980725 | KX980941 |
|                       | 025_2    |    |                                                                                                                                                                                                 | KX980726 | KX980942 |
| <i>U. zhigangi</i>    | 037_1    | 46 | 116–117, H. Zhao, Y. Li, Z. Chen, 2014-X-26, Thailand, Krabi Province, Muang Dist. Ban Khao Klom Nong Thale Subdist., entrance of cave without a name, 08°08.155'N, 98°48.430'E, elevation 89 m | KX980748 | KX980964 |
| <i>Pholcus jiuwei</i> | outgroup |    | Tong Y, 2014-IX-7, China, Liaoning, Benxi,                                                                                                                                                      | KX980760 | KX980976 |

|                                                 |          |                                                                                                                                                   |          |          |
|-------------------------------------------------|----------|---------------------------------------------------------------------------------------------------------------------------------------------------|----------|----------|
| Tong & Ji, 2010                                 |          | Pingshan District, Xing'an Village, 41°15'N, 123°42'E                                                                                             |          |          |
| <i>Pholcus phoenixus</i> Zhang & Zhu, 2009      | outgroup | Q. Zhao, 2014-VIII-28, China, Liaoning, Fenghuang, Fenghuang Mountain, 40°25'38.2"N, 124°4'7.5" E, elevation 149–530 m                            | KX980761 | KX980977 |
| <i>Leptopholcus podophthalmus</i> (Simon, 1893) | outgroup | H. Zhao, L. Shao, 2014-XII-16, China, Hainan, Dongfang, Donghe Town, Nanglang Village, Jiulong Mountain, 19°0.652'N, 109°5.623'E, elevation 522 m | KX980762 | N/A      |

**Table S2. List of cave clusters involved**

| Cave cluster   | Site Number | Coordinate                    |
|----------------|-------------|-------------------------------|
| Cave cluster 1 | 18          | N: 16°54.816', E: 100°43.227' |
|                | 19          | N: 16°55.220', E: 100°43.19'  |
| Cave cluster 2 | 21          | N: 12°35.449', E: 99°43.692'  |
|                | 22          | N: 12°36.255', E: 99°43.341'  |
| Cave cluster 3 | 23          | N: 13°35.018', E: 99°45.297'  |
|                | 24          | N: 13°35.226', E: 99°45.525'  |
| Cave cluster 4 | 26          | N: 14°11.429', E: 99°01.594'  |
|                | 27          | N: 14°11.400', E: 99°01.555'  |
|                | 28          | N: 14°12.219', E: 99°01.666'  |
|                | 29          | N: 14°12.127', E: 99°01.195'  |
|                | 30          | N: 14°12.182', E: 99°01.416'  |
| Cave cluster 5 | 33          | S: 4°52.344', E: 119°53.858'  |
|                | 34          | S: 4°56.304', E: 119°50.341'  |
| Cave cluster 6 | 35          | S: 0°12.275', E: 100°23.475'  |
|                | 39          | S: 0°12.653', E: 100°24.977'  |
|                | 38          | S: 0°14.901' E: 100°28.992'   |
|                | 36          | S: 0°15.739' E: 100°18.491'   |
|                | 37          | S: 0°17.982' E: 100°22.090'   |
|                | 40          | S: 0°18.104' E: 100°21.335'   |
|                | 41          | S: 0°18.458' E: 100°21.933'   |

**Table S3. List of haplotypes and samples that share the same haplotype**

| COI    | Freq. | Samples                                                                                                                                                                               |
|--------|-------|---------------------------------------------------------------------------------------------------------------------------------------------------------------------------------------|
| Hap_1  | 9     | 001_2, 001_5, 001_6, 001_7, 001_8, 001_9, 001_10, 019_3, 019_5                                                                                                                        |
| Hap_2  | 8     | 001_1, 017_3, 019_1, 019_2, 019_4, 024_1, 024_2, 024_3                                                                                                                                |
| Hap_3  | 2     | 001_3, 001_4                                                                                                                                                                          |
| Hap_4  | 9     | 002_1, 002_2, 002_3, 002_4, 002_5, 002_7, 002_8, 002_9, 002_10                                                                                                                        |
| Hap_5  | 1     | 002_6                                                                                                                                                                                 |
| Hap_6  | 21    | 003_1, 003_5, 003_6, 003_8, 008_1, 008_2, 008_3, 008_4, 008_5, 008_6, 008_7, 008_8, 008_9, 013_4, 014_3, 014_5, 015_5, 020_1, 020_3, 020_4, 020_5                                     |
| Hap_7  | 8     | 003_2, 003_3, 003_7, 003_9, 003_10, 014_1, 014_2, 014_4                                                                                                                               |
| Hap_9  | 4     | 004_1, 004_2, 004_5, 004_7                                                                                                                                                            |
| Hap_10 | 1     | 004_3                                                                                                                                                                                 |
| Hap_11 | 8     | 004_4, 004_8, 004_9, 004_10, 018_1, 018_2, 018_3, 018_4                                                                                                                               |
| Hap_12 | 1     | 004_6                                                                                                                                                                                 |
| Hap_13 | 7     | 005_1, 005_2, 005_5, 005_6, 005_8, 005_9, 005_10                                                                                                                                      |
| Hap_14 | 2     | 005_3, 005_4                                                                                                                                                                          |
| Hap_15 | 1     | 005_7                                                                                                                                                                                 |
| Hap_16 | 5     | 006_1, 006_2, 006_5, 006_6, 006_8                                                                                                                                                     |
| Hap_17 | 4     | 006_3, 006_4, 006_7, 006_9                                                                                                                                                            |
| Hap_18 | 1     | 006_10                                                                                                                                                                                |
| Hap_19 | 3     | 007_1, 007_7, 007_10                                                                                                                                                                  |
| Hap_20 | 26    | 007_2, 007_3, 007_4, 007_5, 007_6, 007_8, 007_9, 009_2, 009_5, 009_7, 009_8, 009_9, 009_10, 016_1, 016_2, 016_3, 016_4, 016_5, 017_1, 017_2, 017_4, 017_5, 041_1, 042_1, 405_1, 406_1 |
| Hap_21 | 1     | 008_10                                                                                                                                                                                |
| Hap_22 | 2     | 009_1, 009_4                                                                                                                                                                          |
| Hap_23 | 1     | 009_3                                                                                                                                                                                 |
| Hap_24 | 1     | 009_6                                                                                                                                                                                 |
| Hap_25 | 3     | 010_1, 010_3, 010_6                                                                                                                                                                   |
| Hap_26 | 1     | 010_2                                                                                                                                                                                 |
| Hap_27 | 1     | 010_4                                                                                                                                                                                 |
| Hap_28 | 5     | 010_5, 010_7, 010_8, 010_9, 010_10                                                                                                                                                    |
| Hap_29 | 3     | 011_1, 011_7, 011_8                                                                                                                                                                   |
| Hap_30 | 1     | 011_2                                                                                                                                                                                 |
| Hap_31 | 2     | 011_3, 011_4                                                                                                                                                                          |
| Hap_32 | 1     | 011_5                                                                                                                                                                                 |
| Hap_33 | 1     | 011_6                                                                                                                                                                                 |
| Hap_34 | 1     | 011_9                                                                                                                                                                                 |
| Hap_35 | 1     | 011_10                                                                                                                                                                                |
| Hap_36 | 3     | 012_1, 012_7, 012_10                                                                                                                                                                  |
| Hap_37 | 11    | 012_2, 012_3, 012_4, 012_5, 012_6, 012_8, 012_9, 015_1, 015_2, 015_3, 020_2                                                                                                           |
| Hap_38 | 3     | 013_1, 013_3, 013_5                                                                                                                                                                   |
| Hap_39 | 1     | 013_2                                                                                                                                                                                 |
| Hap_40 | 1     | 015_4                                                                                                                                                                                 |
| Hap_41 | 5     | 018_5, 023_3, 023_4, 026_1, 026_3                                                                                                                                                     |
| Hap_42 | 1     | 021_1                                                                                                                                                                                 |
| Hap_43 | 3     | 021_2, 021_3, 021_4                                                                                                                                                                   |
| Hap_44 | 3     | 021_5, 023_1, 023_2                                                                                                                                                                   |
| Hap_45 | 5     | 022_1, 022_2, 022_3, 022_4, 022_5                                                                                                                                                     |
| Hap_46 | 1     | 023_5                                                                                                                                                                                 |
| Hap_47 | 2     | 025_1, 025_2                                                                                                                                                                          |
| Hap_48 | 1     | 026_2                                                                                                                                                                                 |
| Hap_49 | 3     | 027_1, 027_2, 036_1                                                                                                                                                                   |
| Hap_50 | 2     | 028_1, 028_3                                                                                                                                                                          |
| Hap_51 | 1     | 028_2                                                                                                                                                                                 |
| Hap_52 | 2     | 029_1, 029_2                                                                                                                                                                          |
| Hap_53 | 2     | 030_1, 030_2                                                                                                                                                                          |

|        |   |                            |
|--------|---|----------------------------|
| Hap_54 | 4 | 031_2, 034_1, 034_2, 039_1 |
| Hap_55 | 1 | 032_1                      |
| Hap_56 | 1 | 033_1                      |
| Hap_57 | 1 | 033_2                      |
| Hap_58 | 1 | 033_3                      |
| Hap_59 | 1 | 035_1                      |
| Hap_60 | 1 | 037_1                      |
| Hap_61 | 1 | 038_1                      |
| Hap_62 | 1 | 040_1                      |
| Hap_63 | 2 | 405_2, 406_2               |
| Hap_64 | 1 | 407_1                      |
| Hap_65 | 1 | 408_1                      |

| 28S    | Freq. | Samples                                                                                                                                                                                                                                                                   |
|--------|-------|---------------------------------------------------------------------------------------------------------------------------------------------------------------------------------------------------------------------------------------------------------------------------|
| Hap_3  | 38    | 001_2, 001_3, 001_4, 001_5, 001_7, 001_8, 001_10, 007_1, 007_3, 007_4, 007_8, 007_9, 009_2, 009_3, 009_6, 009_7, 009_8, 009_9, 016_2, 019_3, 019_4, 024_1, 024_2, 024_3, 030_1, 031_2, 034_1, 034_2, 035_1, 039_1, 040_1, 042_1, 405_1, 405_2, 406_1, 406_2, 407_1, 408_1 |
| Hap_4  | 19    | 001_1, 001_6, 001_9, 007_5, 007_6, 007_7, 009_10, 016_1, 016_3, 016_4, 016_5, 017_1, 017_4, 017_5, 019_1, 019_2, 019_5, 032_1, 041_1                                                                                                                                      |
| Hap_5  | 10    | 002_1, 002_2, 002_3, 002_4, 002_5, 002_6, 002_7, 002_8, 002_9, 002_10                                                                                                                                                                                                     |
| Hap_6  | 14    | 003_1, 003_2, 003_3, 003_5, 003_6, 003_7, 003_8, 003_10, 012_1, 012_2, 012_8, 014_2, 015_2, 020_4                                                                                                                                                                         |
| Hap_7  | 37    | 003_9, 008_1, 008_2, 008_3, 008_4, 008_5, 008_6, 008_7, 008_8, 008_9, 008_10, 012_3, 012_4, 012_5, 012_6, 012_7, 012_9, 012_10, 013_1, 013_2, 013_3, 013_4, 013_5, 014_1, 014_3, 014_4, 014_5, 015_1, 015_3, 015_4, 015_5, 020_1, 020_2, 020_3, 020_5, 028_1, 028_3       |
| Hap_8  | 25    | 004_1, 004_2, 004_3, 004_4, 004_5, 004_6, 004_7, 004_8, 004_9, 004_10, 018_1, 018_2, 018_3, 018_4, 018_5, 021_2, 021_3, 021_4, 021_5, 023_1, 023_2, 023_5, 026_1, 026_2, 026_3                                                                                            |
| Hap_9  | 1     | 005_1                                                                                                                                                                                                                                                                     |
| Hap_10 | 9     | 005_2, 005_3, 005_4, 005_5, 005_6, 005_7, 005_8, 005_9, 005_10                                                                                                                                                                                                            |
| Hap_11 | 10    | 006_1, 006_2, 006_3, 006_4, 006_5, 006_6, 006_7, 006_8, 006_9, 006_10                                                                                                                                                                                                     |
| Hap_12 | 8     | 007_2, 007_10, 009_1, 009_4, 009_5, 017_2, 017_3, 030_2                                                                                                                                                                                                                   |
| Hap_13 | 10    | 010_1, 010_2, 010_3, 010_4, 010_5, 010_6, 010_7, 010_8, 010_9, 010_10                                                                                                                                                                                                     |
| Hap_14 | 10    | 011_1, 011_2, 011_3, 011_4, 011_5, 011_6, 011_7, 011_8, 011_9, 011_10                                                                                                                                                                                                     |
| Hap_15 | 3     | 021_1, 023_3, 023_4                                                                                                                                                                                                                                                       |
| Hap_16 | 5     | 022_1, 022_2, 022_3, 022_4, 022_5                                                                                                                                                                                                                                         |
| Hap_17 | 2     | 025_1, 025_2                                                                                                                                                                                                                                                              |
| Hap_18 | 3     | 027_1, 027_2, 036_1                                                                                                                                                                                                                                                       |
| Hap_19 | 2     | 028_2, 033_2                                                                                                                                                                                                                                                              |
| Hap_20 | 2     | 029_1, 029_2                                                                                                                                                                                                                                                              |
| Hap_21 | 1     | 033_1                                                                                                                                                                                                                                                                     |
| Hap_22 | 1     | 033_3                                                                                                                                                                                                                                                                     |
| Hap_23 | 1     | 037_1                                                                                                                                                                                                                                                                     |
| Hap_24 | 1     | 038_1                                                                                                                                                                                                                                                                     |

| COI 28S | Freq. | Samples                                                        |
|---------|-------|----------------------------------------------------------------|
| Hap_1   | 6     | 001_2, 001_5, 001_7, 001_8, 001_10, 019_3                      |
| Hap_2   | 3     | 001_1, 019_1, 019_2                                            |
| Hap_3   | 2     | 001_3, 001_4                                                   |
| Hap_4   | 3     | 001_6, 001_9, 019_5                                            |
| Hap_5   | 9     | 002_1, 002_2, 002_3, 002_4, 002_5, 002_7, 002_8, 002_9, 002_10 |
| Hap_6   | 1     | 002_6                                                          |
| Hap_7   | 5     | 003_1, 003_5, 003_6, 003_8, 020_4                              |
| Hap_8   | 5     | 003_2, 003_3, 003_7, 003_10, 014_2                             |



---

|        |    |                                                                                                                |
|--------|----|----------------------------------------------------------------------------------------------------------------|
| Hap_10 | 3  | 003_9, 014_1, 014_4                                                                                            |
| Hap_11 | 4  | 004_1, 004_2, 004_5, 004_7                                                                                     |
| Hap_12 | 1  | 004_3                                                                                                          |
| Hap_13 | 8  | 004_4, 004_8, 004_9, 004_10, 018_1, 018_2, 018_3, 018_4                                                        |
| Hap_14 | 1  | 004_6                                                                                                          |
| Hap_15 | 1  | 005_1                                                                                                          |
| Hap_16 | 6  | 005_2, 005_5, 005_6, 005_8, 005_9, 005_10                                                                      |
| Hap_17 | 2  | 005_3, 005_4                                                                                                   |
| Hap_18 | 1  | 005_7                                                                                                          |
| Hap_19 | 5  | 006_1, 006_2, 006_5, 006_6, 006_8                                                                              |
| Hap_20 | 4  | 006_3, 006_4, 006_7, 006_9                                                                                     |
| Hap_21 | 1  | 006_10                                                                                                         |
| Hap_22 | 1  | 007_1                                                                                                          |
| Hap_23 | 3  | 007_2, 009_5, 017_2                                                                                            |
| Hap_24 | 12 | 007_3, 007_4, 007_8, 007_9, 009_2, 009_7, 009_8, 009_9, 016_2, 042_1, 405_1, 406_1                             |
| Hap_25 | 11 | 007_5, 007_6, 009_10, 016_1, 016_3, 016_4, 016_5, 017_1, 017_4, 017_5, 041_1                                   |
| Hap_26 | 1  | 007_7                                                                                                          |
| Hap_27 | 1  | 007_10                                                                                                         |
| Hap_28 | 16 | 008_1, 008_2, 008_3, 008_4, 008_5, 008_6, 008_7, 008_8, 008_9, 013_4, 014_3, 014_5, 015_5, 020_1, 020_3, 020_5 |
| Hap_29 | 1  | 008_10                                                                                                         |
| Hap_30 | 2  | 009_1, 009_4                                                                                                   |
| Hap_31 | 1  | 009_3                                                                                                          |
| Hap_32 | 1  | 009_6                                                                                                          |
| Hap_33 | 3  | 010_1, 010_3, 010_6                                                                                            |
| Hap_34 | 1  | 010_2                                                                                                          |
| Hap_35 | 1  | 010_4                                                                                                          |
| Hap_36 | 5  | 010_5, 010_7, 010_8, 010_9, 010_10                                                                             |
| Hap_37 | 3  | 011_1, 011_7, 011_8                                                                                            |
| Hap_38 | 1  | 011_2                                                                                                          |
| Hap_39 | 2  | 011_3, 011_4                                                                                                   |
| Hap_40 | 1  | 011_5                                                                                                          |
| Hap_41 | 1  | 011_6                                                                                                          |
| Hap_42 | 1  | 011_9                                                                                                          |
| Hap_43 | 1  | 011_10                                                                                                         |
| Hap_44 | 1  | 012_1                                                                                                          |
| Hap_45 | 3  | 012_2, 012_8, 015_2                                                                                            |
| Hap_46 | 8  | 012_3, 012_4, 012_5, 012_6, 012_9, 015_1, 015_3, 020_2                                                         |
| Hap_47 | 2  | 012_7, 012_10                                                                                                  |
| Hap_48 | 3  | 013_1, 013_3, 013_5                                                                                            |
| Hap_49 | 1  | 013_2                                                                                                          |
| Hap_50 | 1  | 015_4                                                                                                          |
| Hap_51 | 1  | 017_3                                                                                                          |
| Hap_52 | 3  | 018_5, 026_1, 026_3                                                                                            |
| Hap_53 | 4  | 019_4, 024_1, 024_2, 024_3                                                                                     |
| Hap_54 | 1  | 021_1                                                                                                          |
| Hap_55 | 3  | 021_2, 021_3, 021_4                                                                                            |
| Hap_56 | 3  | 021_5, 023_1, 023_2                                                                                            |
| Hap_57 | 5  | 022_1, 022_2, 022_3, 022_4, 022_5                                                                              |
| Hap_58 | 2  | 023_3, 023_4                                                                                                   |
| Hap_59 | 1  | 023_5                                                                                                          |
| Hap_60 | 2  | 025_1, 025_2                                                                                                   |
| Hap_61 | 1  | 026_2                                                                                                          |
| Hap_62 | 3  | 027_1, 027_2, 036_1                                                                                            |
| Hap_63 | 2  | 028_1, 028_3                                                                                                   |
| Hap_64 | 1  | 028_2                                                                                                          |
| Hap_65 | 2  | 029_1, 029_2                                                                                                   |
| Hap_66 | 1  | 030_1                                                                                                          |
| Hap_67 | 1  | 030_2                                                                                                          |

---

---

|        |   |                            |
|--------|---|----------------------------|
| Hap_68 | 4 | 031_2, 034_1, 034_2, 039_1 |
| Hap_69 | 1 | 032_1                      |
| Hap_70 | 1 | 033_1                      |
| Hap_71 | 1 | 033_2                      |
| Hap_72 | 1 | 033_3                      |
| Hap_73 | 1 | 035_1                      |
| Hap_74 | 1 | 037_1                      |
| Hap_75 | 1 | 038_1                      |
| Hap_76 | 1 | 040_1                      |
| Hap_77 | 2 | 405_2, 406_2               |
| Hap_78 | 1 | 407_1                      |
| Hap_79 | 1 | 408_1                      |

---

**Text S1. Description of *Uthina huahinensis* Yao & Li sp. nov.**

[urn:lsid:zoobank.org:act:3CE79C7A-9273-4E4B-8B00-FB60E7FEF0AF](http://urn:lsid:zoobank.org:act:3CE79C7A-9273-4E4B-8B00-FB60E7FEF0AF)

Figs S6–S8

**Material examined.** Holotype: male, Dao Cave (12°35.449'N, 99°43.692'E, elevation 123 m), Nong Phlap, Hua Hin District, Prachuap Kiri Khan, Thailand, 30 October 2014, H. Zhao, Y. Li and Z. Chen leg. Paratypes: one male and two females, same data as holotype.

**Other material.** One male, two females and seven juveniles, same data as holotype. One male, seven females and two juveniles, Laplae Cave and Kailone Cave (12°36.255'N, 99°43.341'E, elevation 175 m), Nong Phlap, Hua Hin District, Prachuap Kiri Khan, Thailand, 30 October 2014, H. Zhao, Y. Li and Z. Chen leg.

**Etymology.** The specific name refers to the type locality; adjective.

**Diagnosis.** This species resembles *U. huifengi* sp. nov., in having similar male chelicerae (Fig. S7D), uncus (Fig. S7A), and female external genitalia (Fig. S8A), but can be distinguished by distally bifurcated appendix (Fig. S7A), by small angular apophysis close to 'knee' of procurus (arrow in Fig. S6D), and by different shape of vulval pore plates (anterior part wide but posterior part narrow, Fig. S8B).

**Description. Male (holotype):** Total length 4.09 (4.29 with clypeus), carapace 1.09 long, 1.33 wide, opisthosoma 3.00 long, 0.98 wide. Leg I: 43.15 (10.38 + 0.53 + 10.64 + 19.10 + 2.50), leg II: 26.60 (7.05 + 0.52 + 6.73 + 10.90 + 1.40), leg III: 17.32 (4.94 + 0.48 + 4.42 + 6.60 + 0.88), leg IV: 22.36 (6.86 + 0.50 + 6.03 + 8.97 + 1.13); tibia I L/d: 97. Distance PME-PME 0.32; diameter PME 0.08; distance PME-ALE 0.02; AME absent. Sternum wider than long (0.84/0.70). Habitus as in Fig. S7B. Carapace yellowish, with large brown marks extending to ocular area; ocular area yellowish; sternum brown. Legs yellowish, distal parts of femora and tibiae whitish, darker rings absent. Opisthosoma yellowish, with spots posteriorly. Ocular area elevated; each eye triad on top of a short, laterally directed eye-stalk. Thoracic furrow absent. Chelicerae as in Fig. S7D, with a pair of proximo-lateral apophyses and a pair of distal apophyses. Pedipalps as in Figs S6A–B; trochanter with a short retrolatero-ventral apophysis; femur with a dorsal apophysis proximally; procurus simple proximally but complex distally; uncus strongly curved, with scales and a thin distal transparent process; appendix hooked, bifurcated distally, with scales; embolus weakly sclerotized, with some transparent projections distally. Retrolateral trichobothrium of tibia I at 4.9%; legs with short vertical setae on metatarsi and tarsi, without spines and curved setae; tarsus I with more than 20 distinct pseudosegments.

**Female:** Similar to male, habitus as in Fig. S7C. Total length 4.57 (4.87 with clypeus), carapace 1.17 long, 1.20 wide, opisthosoma 3.40 long, 1.13 wide; tibia I: 10.45; tibia I L/d: 82. Distance PME-PME 0.24; diameter PME 0.09; distance PME-ALE 0.02; AME absent. Sternum wider than long (0.84/0.72). Opisthosoma without spots. Ocular area brown, without eye-stalks. External genitalia (Fig. S8A) with a weakly sclerotized knob. Vulva (Fig. S8B) with an anterior arch and two nearly semicircular pore plates.

**Variation:** Unknown. Leg I missing in other specimens.

**Distribution.** Thailand (Prachuap Kiri Khan).

**Natural history.** The species was found in the entrance zones of caves.

**Text S2. Description of *Uthina huifengi* Yao & Li sp. nov.**

[urn:lsid:zoobank.org:act:C81D62D1-EE65-421A-B4DD-3515E75D394E](http://urn:lsid:zoobank.org:act:C81D62D1-EE65-421A-B4DD-3515E75D394E)

Figs S9–S11

**Material examined.** Holotype: male, Kalam Cave (0°12.275'S, 100°23.475'E, elevation 874 m), Bukittinggi, West Sumatra, Sumatra, Indonesia, 18 May 2014, Z. Yao leg. Paratypes: two males and three females, same data as holotype.

**Other material.** Two males and eight females, same data as holotype. Two males, two females and one juvenile, Tarang Cave (0°12.653'S, 100°24.977'E, elevation 877 m), Bukittinggi, West Sumatra, Sumatra, Indonesia, 12 May 2014, Z. Yao leg. One male and two juveniles, near river in a village (2°04.834'S, 101°22.448'E, elevation 1054 m), Talang Cindang, Kerinci, Jambi, Sumatra, Indonesia, 24 May 2014, Z. Yao leg. One female and two juveniles, Bukit Ponggang Cave (0°44.245'S, 100°50.330'E, elevation 278 m), Padang Sibusuk Village, Sijunjung, West Sumatra, Sumatra, Indonesia, 27 May 2014, Z. Yao leg. One male, four females and five juveniles, Cave without a name (0°17.982'S, 100°22.090'E, elevation 940 m), Fort de Kock, Bukittinggi, West Sumatra, Sumatra, Indonesia, 10 January 2014, H. Zhao leg. One male, three females and one juvenile, Jorong Koto Tuo Cave (0°14.901'S, 100°28.992'E, elevation 714 m), Kab Agam Tabik Simarasok Village, West Sumatra, Sumatra, Indonesia, 11 January 2014, H. Zhao leg. Two females and three juveniles, Japanese Cave (0°18.458'S, 100°21.933'E, elevation 906 m), Bukittinggi, West Sumatra, Sumatra, Indonesia, 11 January 2014, H. Zhao leg. One male, seven females and two juveniles, Batang Lawang Cave (0°15.739'S, 100°18.491'E, elevation 761 m), Kanagarian Matuailia, Kab Agam Kecamatan Matur, West Sumatra, Sumatra, Indonesia, 12 January 2014, H. Zhao leg. Two females and three juveniles, Jenjang Seribu Cave (0°18.104'S, 100°21.335'E, elevation 815 m), Bukittinggi, West Sumatra, Sumatra, Indonesia, 12 January 2014, H. Zhao leg.

**Etymology.** The specific name is a patronym in honor of the collector Huifeng Zhao; noun (name) in genitive case.

**Diagnosis.** This species resembles *U. huahinensis* sp. nov., in having similar male chelicerae (Fig. S10D), unculus (Fig. S10A), and female external genitalia (Fig. S11A), but can be distinguished by appendix not bifurcated distally (Fig. S10A), by small angular apophysis close to large weakly sclerotized apophysis of procurus (arrow in Fig. S9D), and by different shape of vulval pore plates (anterior part narrow but posterior part wide, Fig. S11B).

**Description. Male (holotype):** Total length 3.92 (4.00 with clypeus), carapace 1.02 long, 1.20 wide, opisthosoma 2.72 long, 0.86 wide. Leg I: 37.44 (8.91 + 0.52 + 9.10 + 16.73 + 2.18), leg II: 22.53 (5.96 + 0.53 + 5.71 + 9.23 + 1.10), leg III: 14.83 (4.23 + 0.44 + 3.66 + 5.64 + 0.86), leg IV missing; tibia I L/d: 84. Distance PME-PME 0.35; diameter PME 0.08; distance PME-ALE 0.33; AME absent. Sternum wider than long (0.68/0.60). Habitus as in Fig. S10B. Carapace yellowish, with large brown marks extending to ocular area; ocular area yellowish; sternum brown. Legs yellowish, subdistal parts of tibiae whitish, darker rings absent. Opisthosoma pale grey dorsally but yellowish ventrally, with spots dorsally and laterally. Ocular area elevated; each eye triad on top of a short, laterally directed eye-stalk. Thoracic furrow absent. Chelicerae as in Fig. S10D, with a pair of proximo-lateral apophyses and a pair of distal apophyses. Pedipalps as in Figs S9A–B; trochanter with a short

retrolatero-ventral apophysis; femur with a dorsal apophysis proximally; procurus simple proximally but complex distally; uncus strongly curved, with scales; appendix hooked, with a scaly edge and a small apophysis medially; embolus weakly sclerotized, with transparent distal projections. Retrolateral trichobothrium of tibia I at 4.4%; legs with short vertical setae on metatarsi and tarsi, without spines and curved setae; tarsus I with approximately 15 distinct pseudosegments.

**Female:** Similar to male, habitus as in Fig. S10C. Total length 3.37 (3.84 with clypeus), carapace 1.01 long, 1.17 wide, opisthosoma 2.63 long, 0.94 wide; tibia I: 7.44; tibia I L/d: 63. Distance PME-PME 0.23; diameter PME 0.11; distance PME-ALE 0.06; AME absent. Sternum wider than long (0.80/0.71). Opisthosoma yellowish. Ocular area brown, without eye-stalks. External genitalia (Fig. S11A) with a weakly sclerotized knob. Vulva (Fig. S11B) with an anterior arch and two pore plates.

**Variation:** Tibia I in males (n=6): 6.79–9.10 (mean: 7.85). Tibia I in females (n=27): 5.19–7.44 (mean: 6.95).

**Distribution.** Indonesia (West Sumatra, Jambi).

**Natural history.** The species was found in the entrance zones of caves and in bamboo internodes.

### Text S3. Description of *Uthina javaensis* Yao & Li sp. nov.

[urn:lsid:zoobank.org:act:560EF029-35C9-49CC-81BF-5D42E45CA3C4](http://urn:lsid:zoobank.org:act:560EF029-35C9-49CC-81BF-5D42E45CA3C4)

Fig. S12

**Material examined.** Holotype: female, Gua (cave) Gajah (7°56.662'S, 110°26.404'E, elevation 234 m), Mangunan Village, Bantul, Java, Indonesia, 27 August 2014, H. Zhao and Z. Yao leg.

**Other material.** One female, same data as holotype.

**Etymology.** The specific name refers to the type locality; adjective.

**Diagnosis.** This species can be distinguished from all other *Uthina* species by strongly protruding medially vulval anterior arch (Fig. S12B) and by unique shape of vulval pore plates (Fig. S12B).

**Description. Female (holotype):** Total length 4.74 (5.13 with clypeus), carapace 1.10 long, 1.23 wide, opisthosoma 3.64 long, 1.25 wide. Leg I: 34.74 (8.33 + 0.52 + 8.72 + 15.13 + 2.04), leg II: 20.75 (5.64 + 0.51 + 5.45 + 8.33 + 1.10), leg III, leg IV missing; tibia I L/d: 73. Distance PME-PME 0.22; diameter PME 0.12; distance PME-ALE 0.05; AME absent. Sternum wider than long (0.84/0.78). Habitus as in Figs S12C–E. Carapace yellowish, with brown marks extending to ocular area; ocular area brown; sternum brown. Legs yellowish, distal parts of femora brown, distal parts of tibiae whitish, subdistal parts of tibiae brown, darker rings absent. Opisthosoma yellowish, with brown spots dorsally and laterally. Ocular area elevated; without eye-stalks. Thoracic furrow absent. External genitalia (Fig. S12A) with a weakly sclerotized knob. Vulva (Fig. S12B) with an anterior arch and two pore plates. Retrolateral trichobothrium of tibia I at 4.6%; legs with short vertical setae on metatarsi and tarsi, without spines and curved setae; tarsus I with approximately 13 distinct pseudosegments.

**Male:** Unknown.

**Variation:** Unknown. Leg I missing in another female.

**Distribution.** Indonesia (Java).

**Natural history.** The species was found in the entrance zone of the cave.

**Text S4. Description of *Uthina muangensis* Yao & Li sp. nov.**

[urn:lsid:zoobank.org:act:5736AB8A-46E5-4E50-900C-0E7CE3041D87](http://urn:lsid:zoobank.org:act:5736AB8A-46E5-4E50-900C-0E7CE3041D87)

Figs S13–S15

**Material examined.** Holotype: male, Sawamg Cave (13°28.014'N, 99°44.014'E, elevation 44 m), Thuang Luang, Muang District, Ratchaburi, Thailand, 31 October 2014, H. Zhao, Y. Li and Z. Chen leg. Paratypes: two females, same data as holotype.

**Other material.** Three males, six females and one juvenile, same data as holotype.

**Etymology.** The specific name refers to the type locality; adjective.

**Diagnosis.** This species resembles *U. saiyokensis* sp. nov., in having similar male chelicerae (Fig. S14D) and procurus (Figs S13C–D), but can be distinguished by proximal apophysis of uncus indistinct (Fig. S14A), by wide and medially strongly protruding appendix (Fig. S14A), by knob of female external genitalia not swollen distally (Fig. S15A), and by nearly elliptic vulval pore plates (Fig. S15B).

**Description. Male (holotype):** Total length 4.82 (5.06 with clypeus), carapace 1.30 long, 1.50 wide, opisthosoma 3.52 long, 1.30 wide. Leg I missing, leg II: 35.85 (9.17 + 0.67 + 9.23 + 15.38 + 1.40), leg III: 22.89 (6.67 + 0.60 + 5.96 + 8.72 + 0.94), leg IV: 29.73 (8.40 + 0.60 + 7.56 + 11.92 + 1.25). Distance PME-PME 0.43; diameter PME 0.11; distance PME-ALE 0.03; AME absent. Sternum wider than long (0.95/0.80). Habitus as in Fig. S14B. Carapace yellowish, with large brown radiating marks extending to ocular area; ocular area yellowish, with brown marks; sternum dark brown. Legs yellowish, distal parts of femora and tibiae whitish, darker rings absent. Opisthosoma yellowish, with spots posteriorly. Ocular area elevated; each eye triad on top of a laterally directed eye-stalk. Thoracic furrow absent. Chelicerae as in Fig. S14D, with a pair of proximo-lateral apophyses and a pair of distal apophyses. Pedipalps as in Figs S13A–B; trochanter with a short retrolatero-ventral apophysis; femur with a dorsal apophysis proximally; procurus simple proximally but complex distally; uncus strongly curved, with scales and a thin distal transparent process; appendix wide, strongly protruding medially, with scales; embolus weakly sclerotized, with some transparent projections distally. Legs with short vertical setae on metatarsi and tarsi, without spines and curved setae.

**Female:** Similar to male, habitus as in Fig. S14C. Total length 5.08 (5.31 with clypeus), carapace 1.40 long, 1.52 wide, opisthosoma 3.68 long, 1.40 wide; tibia I: 13.14; tibia I L/d: 82. Distance PME-PME 0.29; diameter PME 0.12; distance PME-ALE 0.03; AME absent. Sternum wider than long (0.98/0.83). Opisthosoma without spots. Ocular area without eye-stalks. External genitalia (Fig. S15A) with a weakly sclerotized knob. Vulva (Fig. S15B) with an anterior arch and two nearly elliptic pore plates.

**Variation:** Unknown. Leg I missing in other specimens.

**Distribution.** Thailand (Ratchaburi).

**Natural history.** The species was found in the entrance zone of the cave.

**Text S5. Description of *Uthina potharamensis* Yao & Li sp. nov.**

[urn:lsid:zoobank.org:act:4A034FDA-E209-4534-9881-99C4A22EB961](http://urn:lsid:zoobank.org:act:4A034FDA-E209-4534-9881-99C4A22EB961)

Figs S16–S18

**Material examined.** Holotype: male, Tham (cave) Nam (13°41.860'N, 99°45.415'E), Nang Kaeo, Potharam District, Ratchaburi, Thailand, 21 October 2014, H. Zhao, Y. Li and Z. Chen leg. Paratypes: two females, same data as holotype.

**Other material.** One male, four females and five juveniles, same data as holotype.

**Etymology.** The specific name refers to the type locality; adjective.

**Diagnosis.** This species resembles *U. ratchaburi* Huber, 2011, in having similar male chelicerae (Fig. S17D), unculus (Fig. S17A), and appendix (Fig. S17A), but can be distinguished by presence of a membranous lamella proximally on large, weakly sclerotized prolateral apophysis of procurus (arrow in Fig. S16D), by knob of female external genitalia not bifurcated (Fig. S18A), and by long distance between two vulval pore plates (Fig. S18B).

**Description. Male (holotype):** Total length 3.72 (3.88 with clypeus), prosoma 1.06 long, 1.22 wide, opisthosoma 2.66 long, 0.80 wide. Leg I: 43.79 (10.58 + 0.71 + 10.64 + 19.42 + 2.44), leg II: 25.16 (6.41 + 0.53 + 6.54 + 10.51 + 1.17), leg III: 16.76 (4.74 + 0.50 + 4.17 + 6.41 + 0.94), leg IV: 22.16 (6.41 + 0.50 + 5.51 + 8.65 + 1.09). Distance PME-PME 0.22; diameter PME 0.10; distance PME-ALE 0.03; AME absent. Sternum wider than long (0.75/0.70). Habitus as in Fig. S17B. Carapace yellowish, with light brown marks extending to ocular area; ocular area yellowish, with light brown marks; sternum brown. Legs yellowish, darker rings absent. Opisthosoma yellowish, with spots dorsally. Ocular area elevated; each eye triad on top of a short, laterally directed eye-stalk. Thoracic furrow absent. Chelicerae as in Fig. S17D, with a pair of proximo-lateral apophyses and a pair of distal apophyses. Pedipalps as in Figs S16A–B; trochanter with a short retrolatero-ventral apophysis; femur with a dorsal apophysis proximally; procurus simple proximally but complex distally; unculus strongly curved, with scales and a thin distal transparent process; appendix hooked and with scales; embolus weakly sclerotized. Legs with short vertical setae on tibiae, metatarsi and tarsi; without spines and curved setae.

**Female:** Similar to male, habitus as in Fig. S17C. Total length 4.37 (4.68 with clypeus), carapace 1.17 long, 1.22 wide, opisthosoma 3.20 long, 1.02 wide; tibia I: 11.09; tibia I L/d: 84. Distance PME-PME 0.24; diameter PME 0.10; distance PME-ALE 0.03. Sternum wider than long (0.95/0.75). Carapace and ocular area with dark brown marks; ocular area without eye-stalks. External genitalia (Fig. S18A) with a weakly sclerotized knob. Vulva (Fig. S18B) with an anterior arch and two elliptic pore plates.

**Variation:** Leg I missing in another male. Tibia I in females (n=4): 9.29–11.12 (mean: 10.21).

**Distribution.** Thailand (Ratchaburi).

**Natural history.** The species was found in the entrance zone of the cave.

**Text S6. Description of *Uthina sai yokensis* Yao & Li sp. nov.**

[urn:lsid:zoobank.org:act:0780BF58-5336-4F81-8D2E-9DDDEE3CA7A6](http://urn:lsid:zoobank.org:act:0780BF58-5336-4F81-8D2E-9DDDEE3CA7A6)

Figs S19–S21

**Material examined.** Holotype: male, Cave without a name (14°11.400'N, 99°01.555'E, elevation 334 m), Wang Krachae, Sai Yok District, Kanchanaburi, Thailand, 2 November 2014, H. Zhao, Y. Li and Z. Chen leg. Paratype: one female, same data as holotype.

**Other material.** Two males, two females and one juvenile, same data as holotype. One male and nine females, Cave without a name (14°11.429'N, 99°01.594'E, elevation 324 m), Wang Krachae, Sai Yok District, Kanchanaburi, Thailand, 2 November 2014, H. Zhao, Y. Li and Z. Chen leg. Two females and three juveniles, Cave without a name (14°12.219'N, 99°01.666'E, elevation 325 m), Wang Krachae, Sai Yok District, Kanchanaburi, Thailand, 1 November 2014, H. Zhao, Y. Li and Z. Chen leg. One female and four juveniles, Cave without a name (14°12.127'N, 99°01.195'E, elevation 438 m), Wang Krachae, Sai Yok District, Kanchanaburi, Thailand, 1 November 2014, H. Zhao, Y. Li and Z. Chen leg. Three juveniles, Cave without a name (14°12.182'N, 99°01.416'E, elevation 342 m), Wang Krachae, Sai Yok District, Kanchanaburi, Thailand, 1 November 2014, H. Zhao, Y. Li and Z. Chen leg.

**Etymology.** The specific name refers to the type locality; adjective.

**Diagnosis.** This species resembles *U. muangensis* sp. nov., in having similar male chelicerae (Fig. S20D) and procurus (Figs S19C–D), but can be distinguished by presence of a distinct apophysis proximally on uncus (arrow in Fig. S20A), by slender appendix and appendix not protruding medially (Fig. S20A), by knob of female external genitalia swollen distally (Fig. S21A), and by nearly triangular vulval pore plates (Fig. S21B). This species also resembles *U. sarikaensis* sp. nov., in having similar knob of female external genitalia (Fig. S21A), but can be distinguished by nearly triangular vulval pore plates (Fig. S21B).

**Description. Male (holotype):** Total length 4.57 (4.94 with clypeus), carapace 1.21 long, 1.41 wide, opisthosoma 3.36 long, 1.22 wide. Leg I: 51.1 (11.86 + 0.76 + 12.63 + 23.33 + 2.52), leg II, leg III and leg IV missing; tibia I L/d: 94. Distance PME-PME 0.37; diameter PME 0.11; distance PME-ALE 0.03; AME absent. Sternum wider than long (0.90/0.76). Habitus as in Fig. S20B. Carapace yellowish, with large brown marks extending to ocular area; ocular area yellowish, with a brown band medially; sternum dark brown. Legs yellowish, distal parts of femora and tibiae whitish, darker rings absent. Opisthosoma yellowish, with spots dorsally. Ocular area elevated; each eye triad on top of a short, laterally directed eye-stalk. Thoracic furrow absent. Chelicerae as in Fig. S20D, with a pair of proximo-lateral apophyses and a pair of distal apophyses. Pedipalps as in Figs S19A–B; trochanter with a short retrolatero-ventral apophysis; femur with a dorsal apophysis proximally; procurus simple proximally but complex distally; uncus strongly curved, with scales; appendix hooked, with scales; embolus weakly sclerotized, with some transparent projections distally. Retrolateral trichobothrium of tibia I at 7.3%; legs with short vertical setae on metatarsi and tarsi, without spines and curved setae; tarsus I with about 5 distinct pseudosegments.

**Female:** Similar to male, habitus as in Fig. S20C. Total length 4.53 (4.81 with clypeus), carapace 1.13 long, 1.19 wide, opisthosoma 3.40 long, 1.41 wide. Distance PME-PME 0.25; diameter PME 0.10; distance PME-ALE 0.02; AME absent. Sternum wider than long (0.86/0.74). Opisthosoma without spots. Ocular area brown, with a dark brown band medially, without eye-stalks. External genitalia (Fig. S21A) with a weakly sclerotized knob. Vulva (Fig. S21B) with an anterior arch and two nearly triangular pore plates.



**Variation:** Tibia I in males (n=2): 10.58, 12.63. Tibia I in females (n=18): 7.05–11.54 (mean: 9.65).

**Distribution.** Thailand (Kanchanaburi).

**Natural history.** The species was found in the entrance zones of caves.

**Text S7. Description of *Uthina sarikaensis* Yao & Li sp. nov.**

[urn:lsid:zoobank.org:act:B74F0176-11F0-4F91-AE1F-FD5F52A834DC](http://urn:lsid:zoobank.org:act:B74F0176-11F0-4F91-AE1F-FD5F52A834DC)

Fig. S22

**Material examined.** Holotype: female, Tham (Cave) Sarika (13°29.773'N, 99°44.229'E, elevation 48 m), Muang District, Ratchaburi, Thailand, 21 October 2014, H. Zhao, Y. Li and Z. Chen leg.

**Etymology.** The specific name refers to the type locality; adjective.

**Diagnosis.** This species resembles *U. potharamensis* sp. nov. and *U. saiyokensis* sp. nov., in having similar knob of female external genitalia (Fig. S22A), but can be distinguished from *U. potharamensis* sp. nov. by short distance between two vulval pore plates (Fig. S22B), distinguished from *U. saiyokensis* sp. nov. by nearly oval vulval pore plates (Fig. S22B).

**Description. Female (holotype):** Total length 4.03 (4.23 with clypeus), carapace 1.09 long, 1.17 wide, opisthosoma 2.94 long, 0.92 wide. Leg I, leg III and leg IV missing, leg II: 21.78 (4.81 + 0.48 + 4.17 + 6.15 + 0.94). Distance PME-PME 0.29; diameter PME 0.06; distance PME-ALE 0.03; AME absent. Sternum wider than long (0.79/0.71). Habitus as in Figs S22C–E. Carapace yellowish, with brown marks extending to ocular area; ocular area yellowish, with a brown band medially and brown marks laterally; sternum brown. Legs yellowish, distal parts of femora whitish, darker rings absent. Opisthosoma yellowish, with spots posteriorly. Ocular area elevated; without eye-stalks. Thoracic furrow absent. External genitalia (Fig. S22A) with a weakly sclerotized knob. Vulva (Fig. S22B) with an anterior arch and two nearly oval pore plates. Legs with short vertical setae on metatarsi and tarsi, without spines and curved setae.

**Male:** Unknown.

**Variation:** Unknown.

**Distribution.** Thailand (Ratchaburi).

**Natural history.** The species was found in the entrance zone of the cave.

**Text S8. Description of *Uthina sulawesiensis* Yao & Li sp. nov.**

[urn:lsid:zoobank.org:act:4458BB80-B637-4E9D-924E-B02BD4AD5BB3](http://urn:lsid:zoobank.org:act:4458BB80-B637-4E9D-924E-B02BD4AD5BB3)

Figs S23–S25

**Material examined.** Holotype: male, Cave without a name (4°52.344'S, 119°53.858'E, elevation 417 m), Maros, South Sulawesi, Indonesia, 23 August 2014, H. Zhao and Z. Yao leg. Paratype: one female, same data as holotype.

**Other material.** One female, Gua (cave) Liang Gose (4°56.304'S, 119°50.341'E, elevation 355 m), Benteng Orchard, Cenrana Village, Maros, South Sulawesi, Indonesia, 23

August 2014, H. Zhao and Z. Yao leg.

**Etymology.** The specific name refers to the type locality; adjective.

**Diagnosis.** This species resembles one type of *U. luzonica* from North Sulawesi in Huber (2011), in having similar unculus (Fig. S24A) and female external genitalia (Fig. S25A), but can be distinguished by appendix not bifurcated distally (Fig. S24A) and by large, wide vulval pore plates (Fig. S25B). This species can be distinguished from other species in *Uthina* by presence of a large membranous process distally on unculus (Fig. S24A), by presence of a large angular apophysis close to large weakly sclerotized apophysis of procurus (arrow in Fig. S23D), and by unique shape of vulval pore plates (Fig. S25B).

**Description. Male (holotype):** Total length 4.16 (4.42 with clypeus), carapace 1.03 long, 1.09 wide, opisthosoma 3.13 long, 0.88 wide. Leg I missing, leg II: 21.78 (5.78 + 0.47 + 5.51 + 8.72 + 1.30), leg III: 14.26 (4.10 + 0.43 + 3.53 + 5.26 + 0.94), leg IV: 20.61 (6.09 + 0.44 + 5.13 + 8.01 + 0.94). Distance PME-PME 0.27; diameter PME 0.08; distance PME-ALE 0.08; AME absent. Sternum wider than long (0.77/0.70). Habitus as in Fig. S24B. Carapace yellowish, with brown marks extending to ocular area; ocular area brown; sternum brown. Legs yellowish, distal parts of femora and tibiae whitish, subdistal parts of femora and tibiae brown, darker rings absent. Opisthosoma yellowish, with spots dorsally. Ocular area elevated; each eye triad on top of a short, laterally directed eye-stalk. Thoracic furrow absent. Chelicerae as in Fig. S24D, with a pair of proximo-lateral apophyses and a pair of distal apophyses. Pedipalps as in Figs S23A–B; trochanter with a short retrolatero-ventral apophysis; femur with a dorsal apophysis proximally; procurus simple proximally but complex distally; unculus strongly curved, with scales, a larger transparent process distally, and a small, thin process distally; appendix hooked, with scales; embolus weakly sclerotized. Legs with short vertical setae on tibiae, metatarsi and tarsi; without spines and curved setae.

**Female:** Similar to male, habitus as in Fig. S24C. Total length 3.38 (3.56 with clypeus), carapace 1.00 long, 1.08 wide, opisthosoma 2.38 long, 0.96 wide; leg I missing. Distance PME-PME 0.20; diameter PME 0.11; distance PME-ALE 0.04. Sternum wider than long (0.69/0.67). Ocular area without eye-stalks. External genitalia (Fig. S25A) with a weakly sclerotized knob. Vulva (Fig. S25B) with an anterior arch and two pore plates.

**Variation:** Tibia I in another female: 8.46.

**Distribution.** Indonesia (South Sulawesi).

**Natural history.** The species was found in the entrance zones of caves.

### Text S9. Description of *Uthina wongpromi* Yao & Li sp. nov.

[urn:lsid:zoobank.org:act:C8BDC3F2-20D7-49E6-A700-4A1E5390015D](http://urn:lsid:zoobank.org:act:C8BDC3F2-20D7-49E6-A700-4A1E5390015D)

Figs S26–S27

**Material examined.** Holotype: male, Phra Kha Yang Cave (10°19.568'N, 98°45.908'E, elevation 6 m), Kraburi District, Ranong, Thailand, 28 October 2014, H. Zhao, Y. Li and Z. Chen leg.

**Other material.** One juvenile, Tham Than La Cave (16°54.816'N, 100°43.227'E, elevation 510 m), Ban Kaset Sut Village, Nakhonthai District, Phitsanulok, Thailand, 17 October 2014, W. Prasit, Y. Li and Z. Chen leg. Two juveniles, Taraswan Cave (16°55.220'N,

100°43.19'E, elevation 460 m), Ban Tham Phrik Village, Nakhothai District, Phitsanulok, Thailand, 18 October 2014, H. Zhao, Y. Li and Z. Chen leg.

**Etymology.** The specific name is a patronym in honor of the collector Wongprom Prasit; noun (name) in genitive case.

**Diagnosis.** This species resembles true *U. luzonica* and one type of *U. luzonica* from Fiji in Huber (2011), in having similar uncus (Fig. S27A), but can be distinguished by distally bifurcated appendix (Fig. S27A); also distinguished from true *U. luzonica* by large bifurcated apophysis close to large weakly sclerotized apophysis of procurus (arrow in Fig. S26D; large angular apophysis not bifurcated in *U. luzonica*).

**Description. Male (holotype):** Total length 4.30 (4.49 with clypeus), carapace 1.02 long, 1.19 wide, opisthosoma 3.28 long, 1.06 wide. Leg I: 37.12 (8.85 + 0.56 + 9.29 + 16.22 + 2.20), leg II, leg III, leg IV missing; tibia I L/d: 68. Distance PME-PME 0.32; diameter PME 0.13; distance PME-ALE 0.05; AME absent. Sternum wider than long (0.85/0.80). Habitus as in Fig. S27B. Carapace yellowish, with brown marks extending to ocular area, ocular area dark brown; sternum dark brown. Legs yellowish, distal parts of femora and tibiae whitish, darker rings absent. Opisthosoma yellowish, with spots dorsally and laterally. Ocular area elevated; each eye triad on top of a short, laterally directed eye-stalk. Thoracic furrow absent. Chelicerae as in Fig. S27C, with a pair of proximo-lateral apophyses and a pair of distal apophyses. Pedipalps as in Figs S26A–B; trochanter with a short retrolatero-ventral apophysis; femur with a dorsal apophysis proximally; procurus simple proximally but complex distally; uncus strongly curved, with scales and a thin distal transparent process; appendix hooked, with scales, bifurcated distally; embolus weakly sclerotized. Retrolateral trichobothrium of tibia I at 3.4%; legs with short vertical setae on tibiae, metatarsi and tarsi; without spines and curved setae; tarsus I with approximately 12 distinct pseudosegments.

**Female:** Unknown.

**Variation:** Unknown.

**Distribution.** Thailand (Ranong, Phitsanulok).

**Natural history.** The species was found in the entrance zones of caves.

#### **Text S10. Description of *Uthina yunchuni* Yao & Li sp. nov.**

[urn:lsid:zoobank.org:act:D94F2B1F-B4A1-4C12-868C-EBF3DE8BB683](http://urn:lsid:zoobank.org:act:D94F2B1F-B4A1-4C12-868C-EBF3DE8BB683)

Fig. S28

**Material examined.** Holotype: female, Cave without a name (8°05.122'N, 98°51.223'E, elevation 442 m), Ban Chong Plee, Muang District, Krabi, Thailand, 25 October 2014, H. Zhao, Y. Li and Z. Chen leg.

**Other material.** One female, same data as holotype.

**Etymology.** The specific name is a patronym in honor of the collector Yunchun Li; noun (name) in genitive case.

**Diagnosis.** This species resembles *P. zhigangi* sp. nov., in having similar vulval pore plates (Fig. S28B), but can be distinguished by wide knob of female external genitalia (Fig. S28A).

**Description. Female (holotype):** Total length 3.63 (3.88 with clypeus), carapace 1.00

long, 1.04 wide, opisthosoma 2.63 long, 0.80 wide. Leg I missing, leg II: 20.06 (5.45 + 0.44 + 5.13 + 7.82 + 1.22), leg III: 13.80 (3.97 + 0.44 + 3.53 + 5.00 + 0.86), leg IV: 19.46 (6.09 + 0.44 + 5.45 + 6.60 + 0.88). Distance PME-PME 0.25; diameter PME 0.08; distance PME-ALE 0.02; AME absent. Sternum wider than long (0.70/0.62). Habitus as in Figs S28C–E. Carapace yellowish, with brown marks extending to ocular area; ocular area yellowish, with brown marks; sternum brown. Legs yellowish, distal parts of femora and tibiae whitish, darker rings absent. Opisthosoma yellowish, with spots dorsally and laterally. Ocular area elevated; without eye-stalks. Thoracic furrow absent. External genitalia (Fig. S28A) with a weakly sclerotized knob. Vulva (Fig. S28B) with an anterior arch and two long pore plates. Legs with short vertical setae on metatarsi and tarsi, without spines and curved setae.

**Male:** Unknown.

**Variation:** Tibia I in another female: 8.97.

**Distribution.** Thailand (Krabi).

**Natural history.** The species was found in the entrance zone of the cave.

### Text S11. Description of *Uthina zhigangi* Yao & Li sp. nov.

[urn:lsid:zoobank.org:act:809004F3-A47B-45B5-BD93-59B0655D5E28](http://urn:lsid:zoobank.org:act:809004F3-A47B-45B5-BD93-59B0655D5E28)

Fig. S29

**Material examined.** Holotype: female, Cave without a name (8°08.155'N, 98°48.430'E, elevation 89 m), Ban Khao Klom Nong Thale, Muang District, Krabi, Thailand, 26 October 2014, H. Zhao, Y. Li and Z. Chen leg.

**Etymology.** The specific name is a patronym in honor of the collector Zhigang Chen; noun (name) in genitive case.

**Diagnosis.** This species resembles *P. yunchuni* sp. nov., in having similar vulval pore plates (Fig. S29B), but can be distinguished by distally narrow knob of female external genitalia (Fig. S29A).

**Description. Female (holotype):** Total length 4.03 (4.36 with clypeus), carapace 1.03 long, 1.10 wide, opisthosoma 3.00 long, 0.92 wide. Leg I, leg II and leg IV missing, leg III: 14.26 (3.97 + 0.36 + 3.46 + 5.13 + 0.94). Distance PME-PME 0.13; diameter PME 0.09; distance PME-ALE 0.03; AME absent. Sternum wider than long (0.73/0.64). Habitus as in Figs S29C–E. Carapace yellowish, with brown marks extending to ocular area; ocular area yellowish with brown marks; sternum brown. Legs yellowish, distal parts of femora whitish, darker rings absent. Opisthosoma yellowish, with spots dorsally and laterally. Ocular area elevated; without eye-stalks. Thoracic furrow absent. External genitalia (Fig. S29A) with a weakly sclerotized knob. Vulva (Fig. S29B) with an anterior arch and two long pore plates. Legs with short vertical setae on metatarsi and tarsi, without spines and curved setae.

**Male:** Unknown.

**Variation:** Unknown.

**Distribution.** Thailand (Krabi).

**Natural history.** The species was found in the entrance zone of the cave.

**Figure S6. Illustrations of *Uthina huahinensis* Yao & Li sp. nov., holotype male.** A–B, pedipalp (A, prolateral view; B, retrolateral view); C–D, distal part of procurus (C, prolateral view; D, dorsal view, arrow points at small angular apophysis). Scale bars: 0.20 (A–B), 0.05 (C–D)

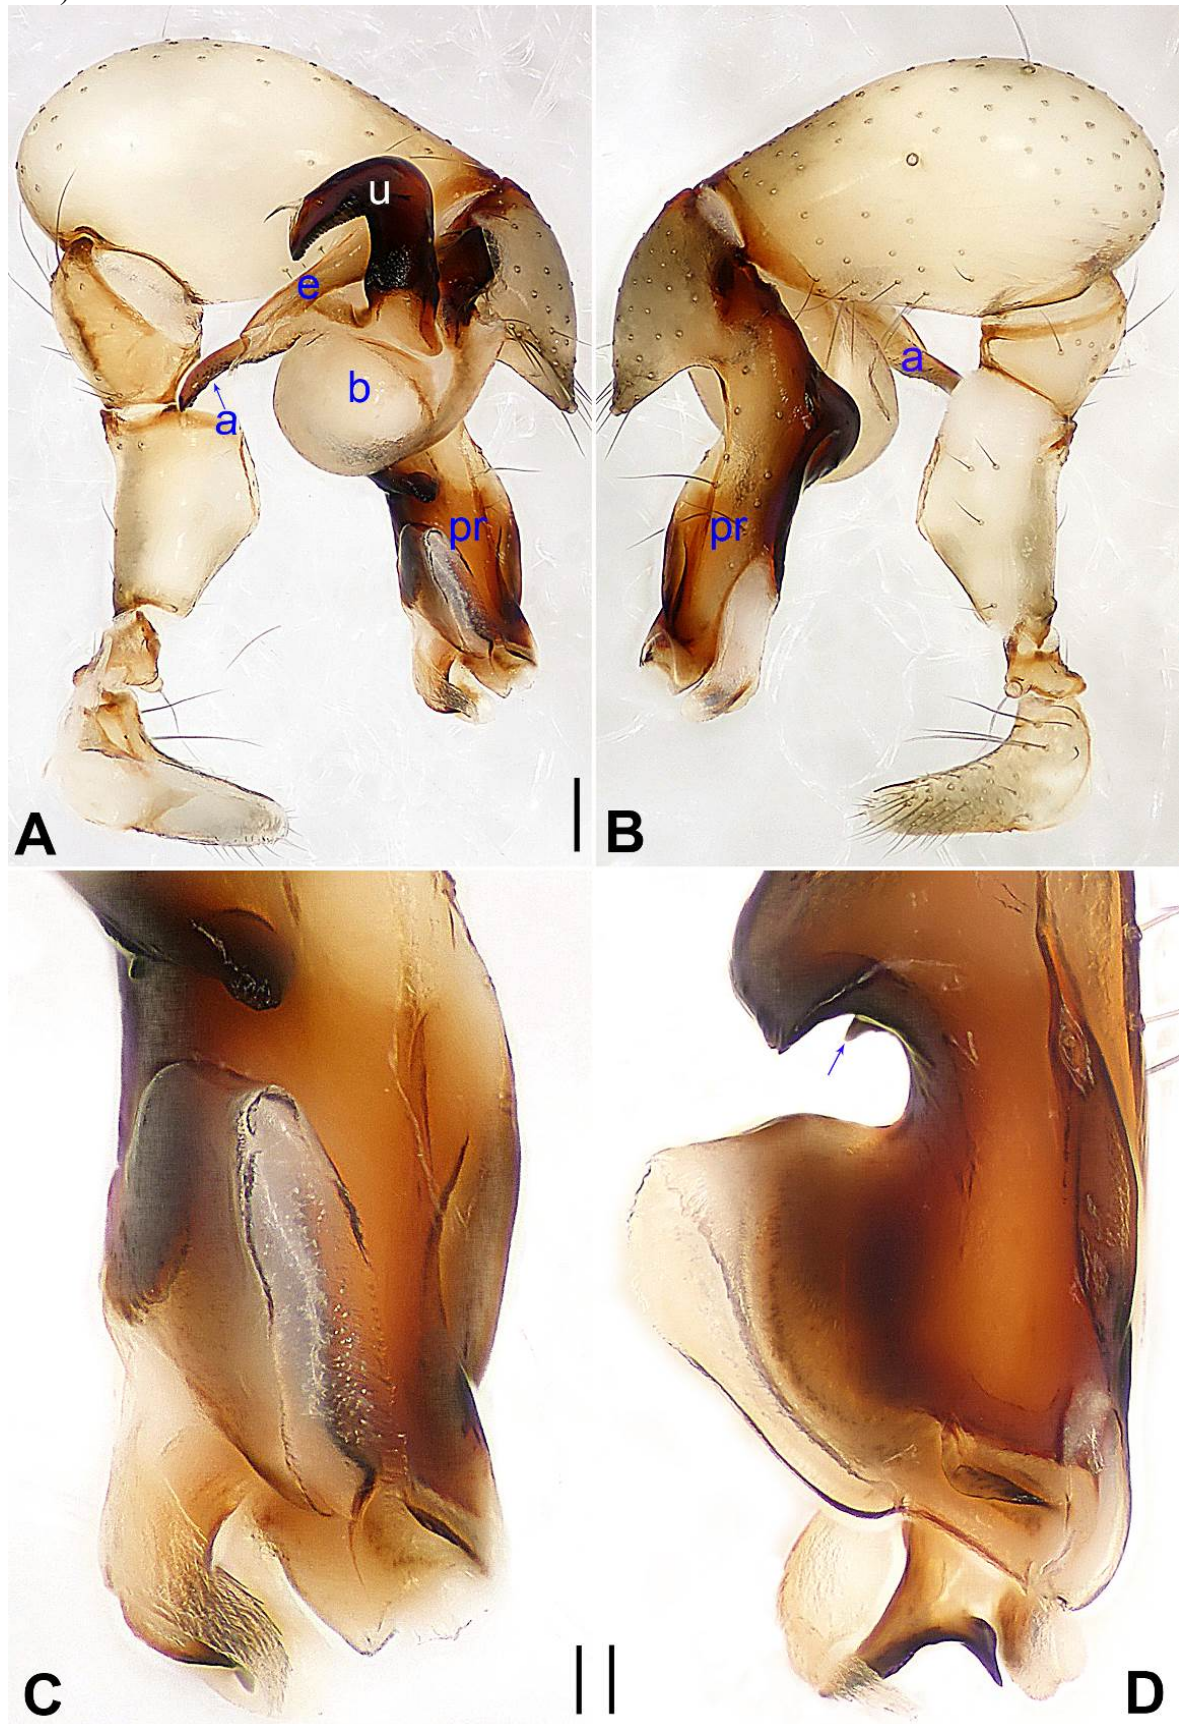

**Figure S7. Illustrations of *Uthina huahinensis* Yao & Li sp. nov.**, holotype male (A–B, D) and paratype female (C). A, bulbal apophyses, prolateral view; B–C, habitus, dorsal view; D, chelicerae, frontal view. Scale bars: 0.05 (A), 0.50 (B–C), 0.10 (D)

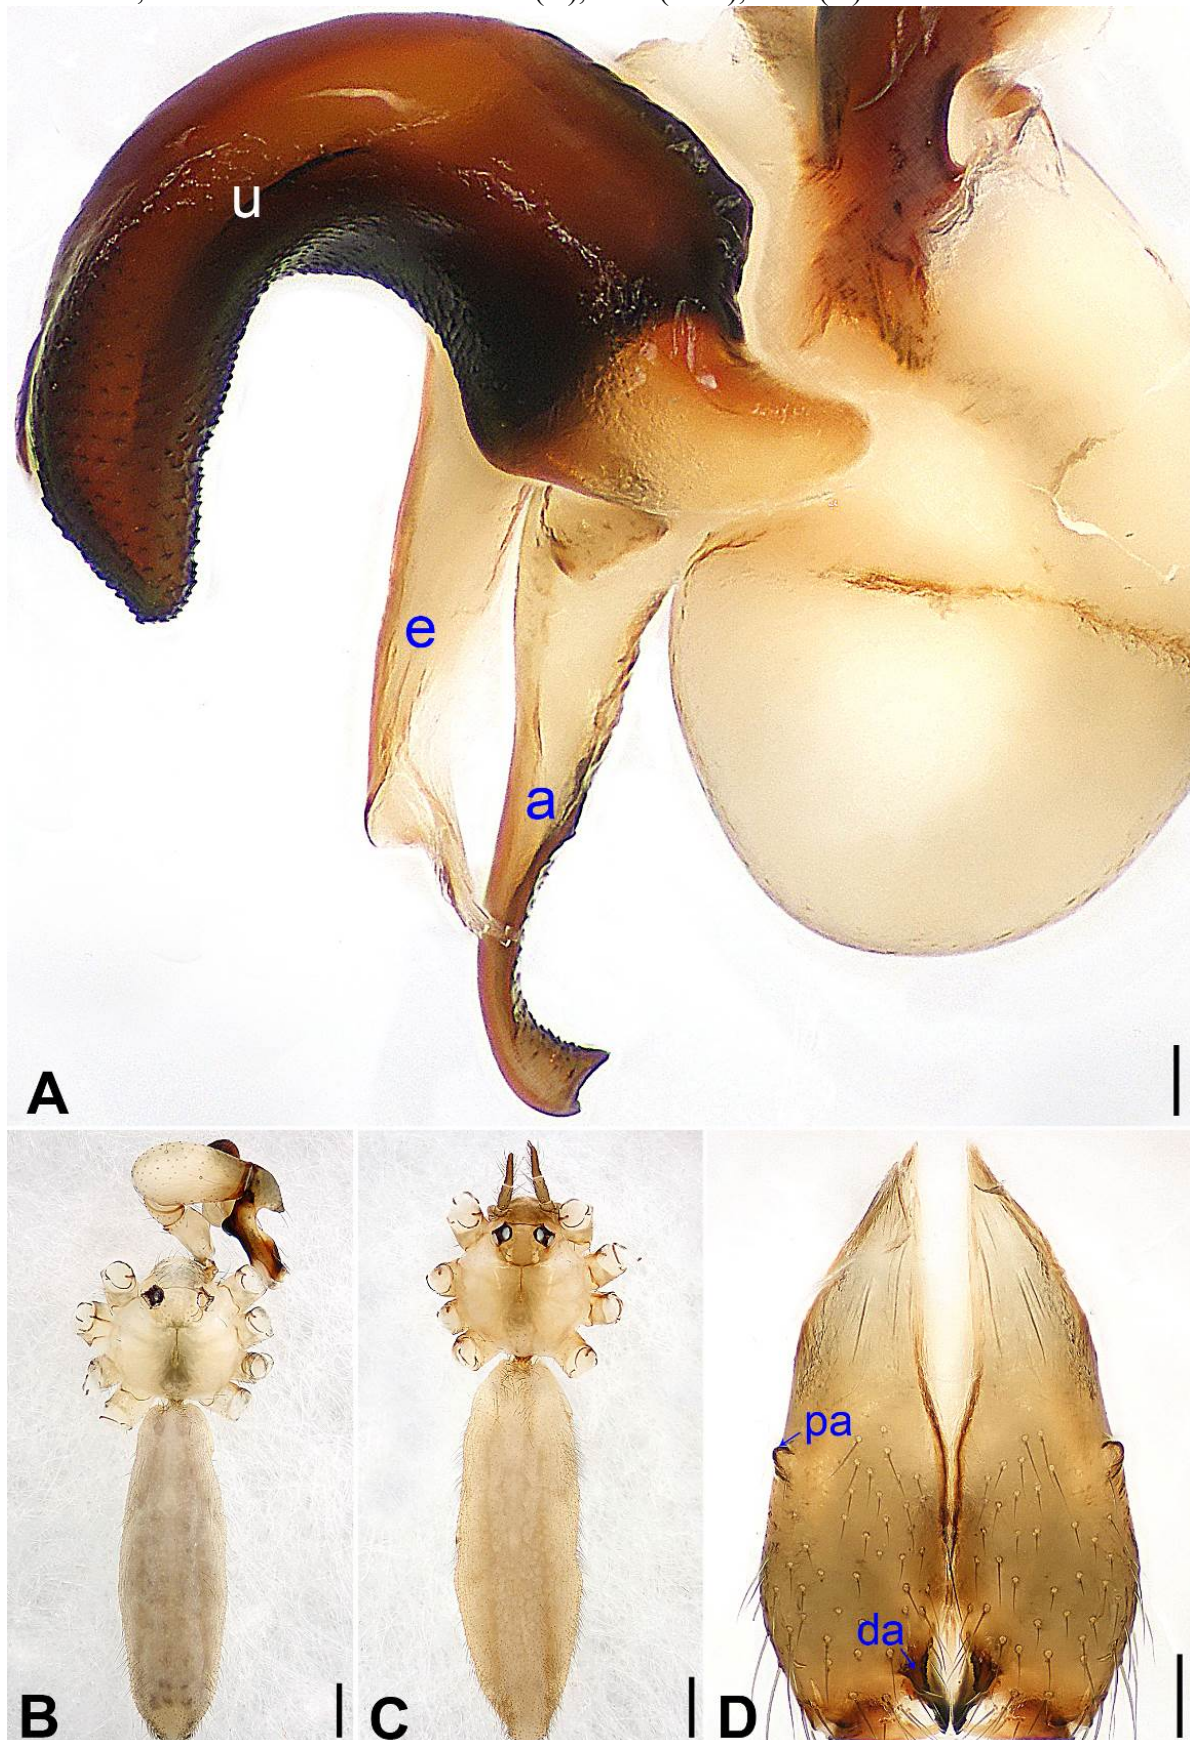

**Figure S8. Illustrations of *Uthina huahinensis* Yao & Li sp. nov., paratype female. A, external genitalia, ventral view; B, vulva, dorsal view. Scale bars: 0.05**

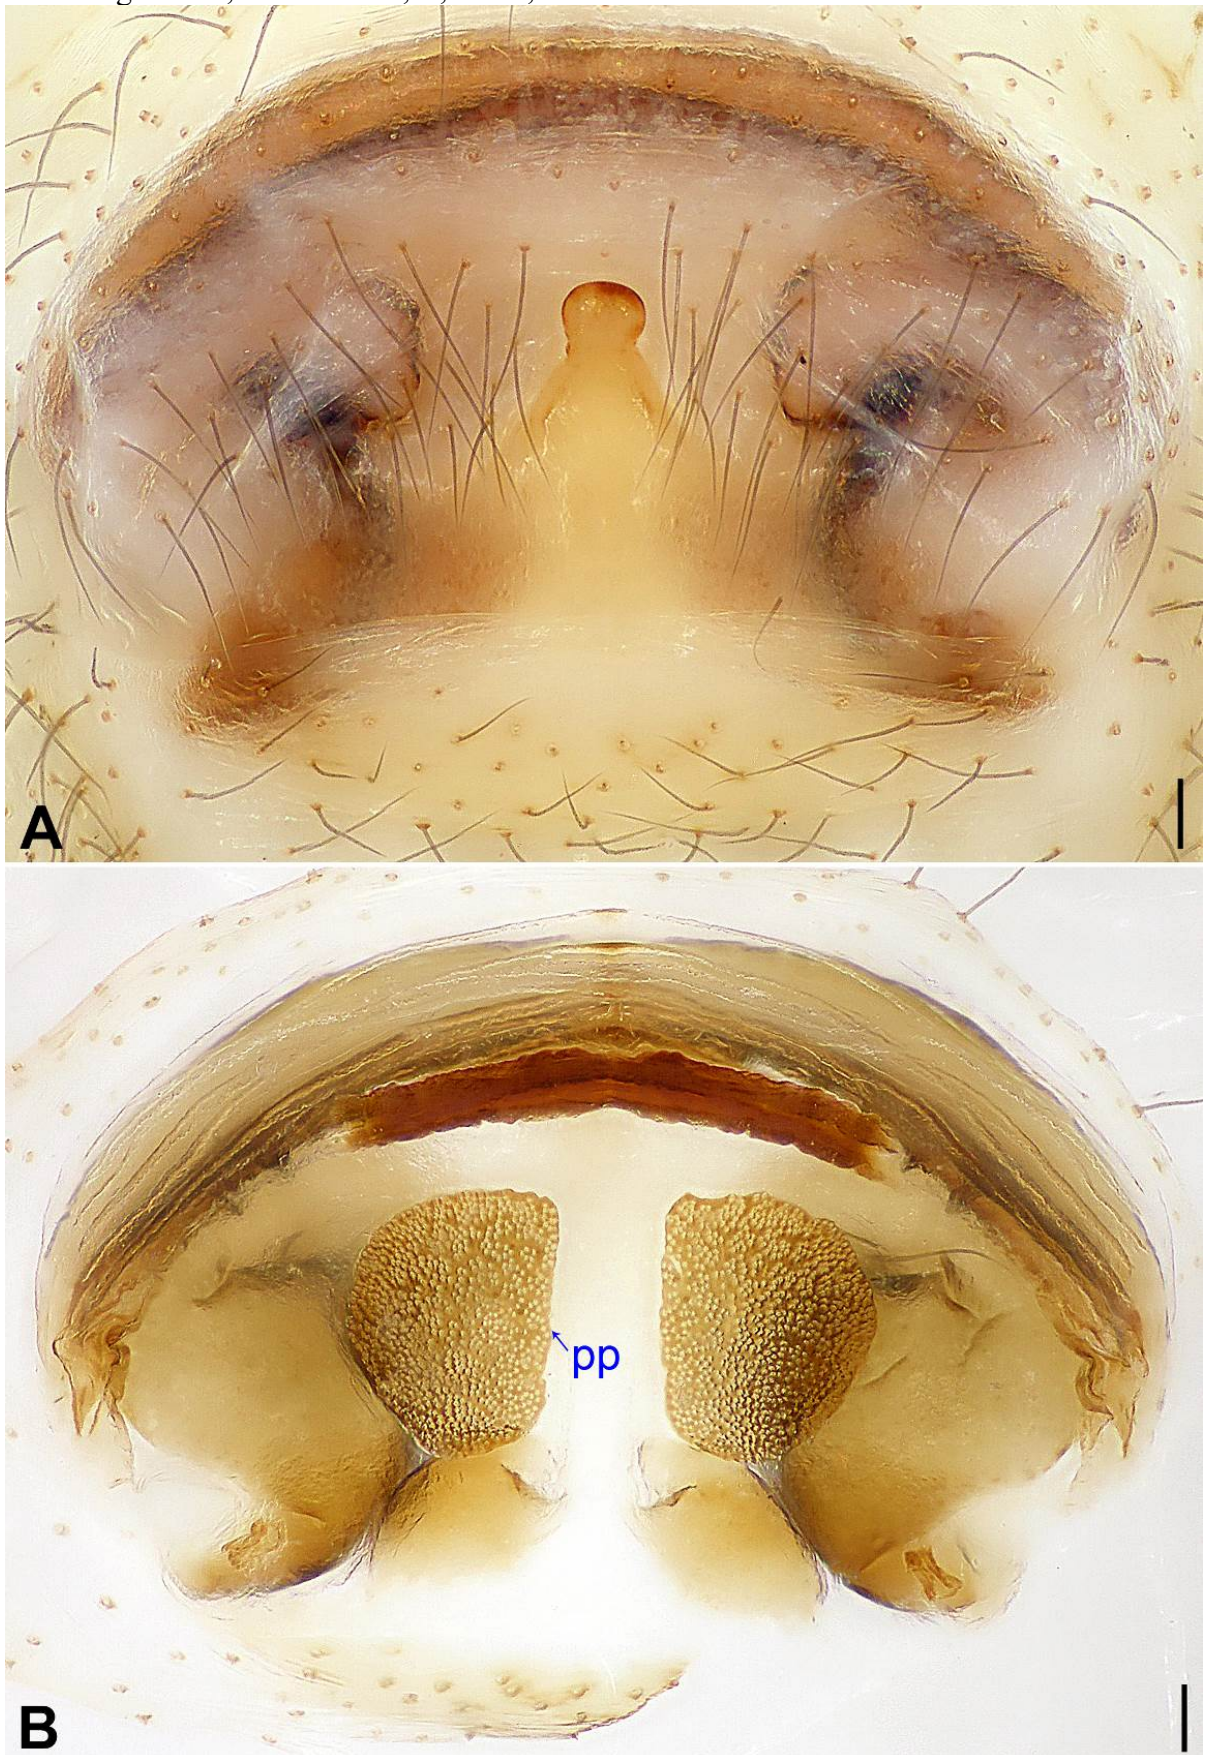

**Figure S9. Illustrations of *Uthina huifengi* Yao & Li sp. nov., holotype male.** A–B, pedipalp (A, prolateral view; B, retrolateral view); C–D, distal part of procurus (C, prolateral view; D, dorsal view, arrow points at small angular apophysis). Scale bars: 0.15 (A–B), 0.05 (C–D)

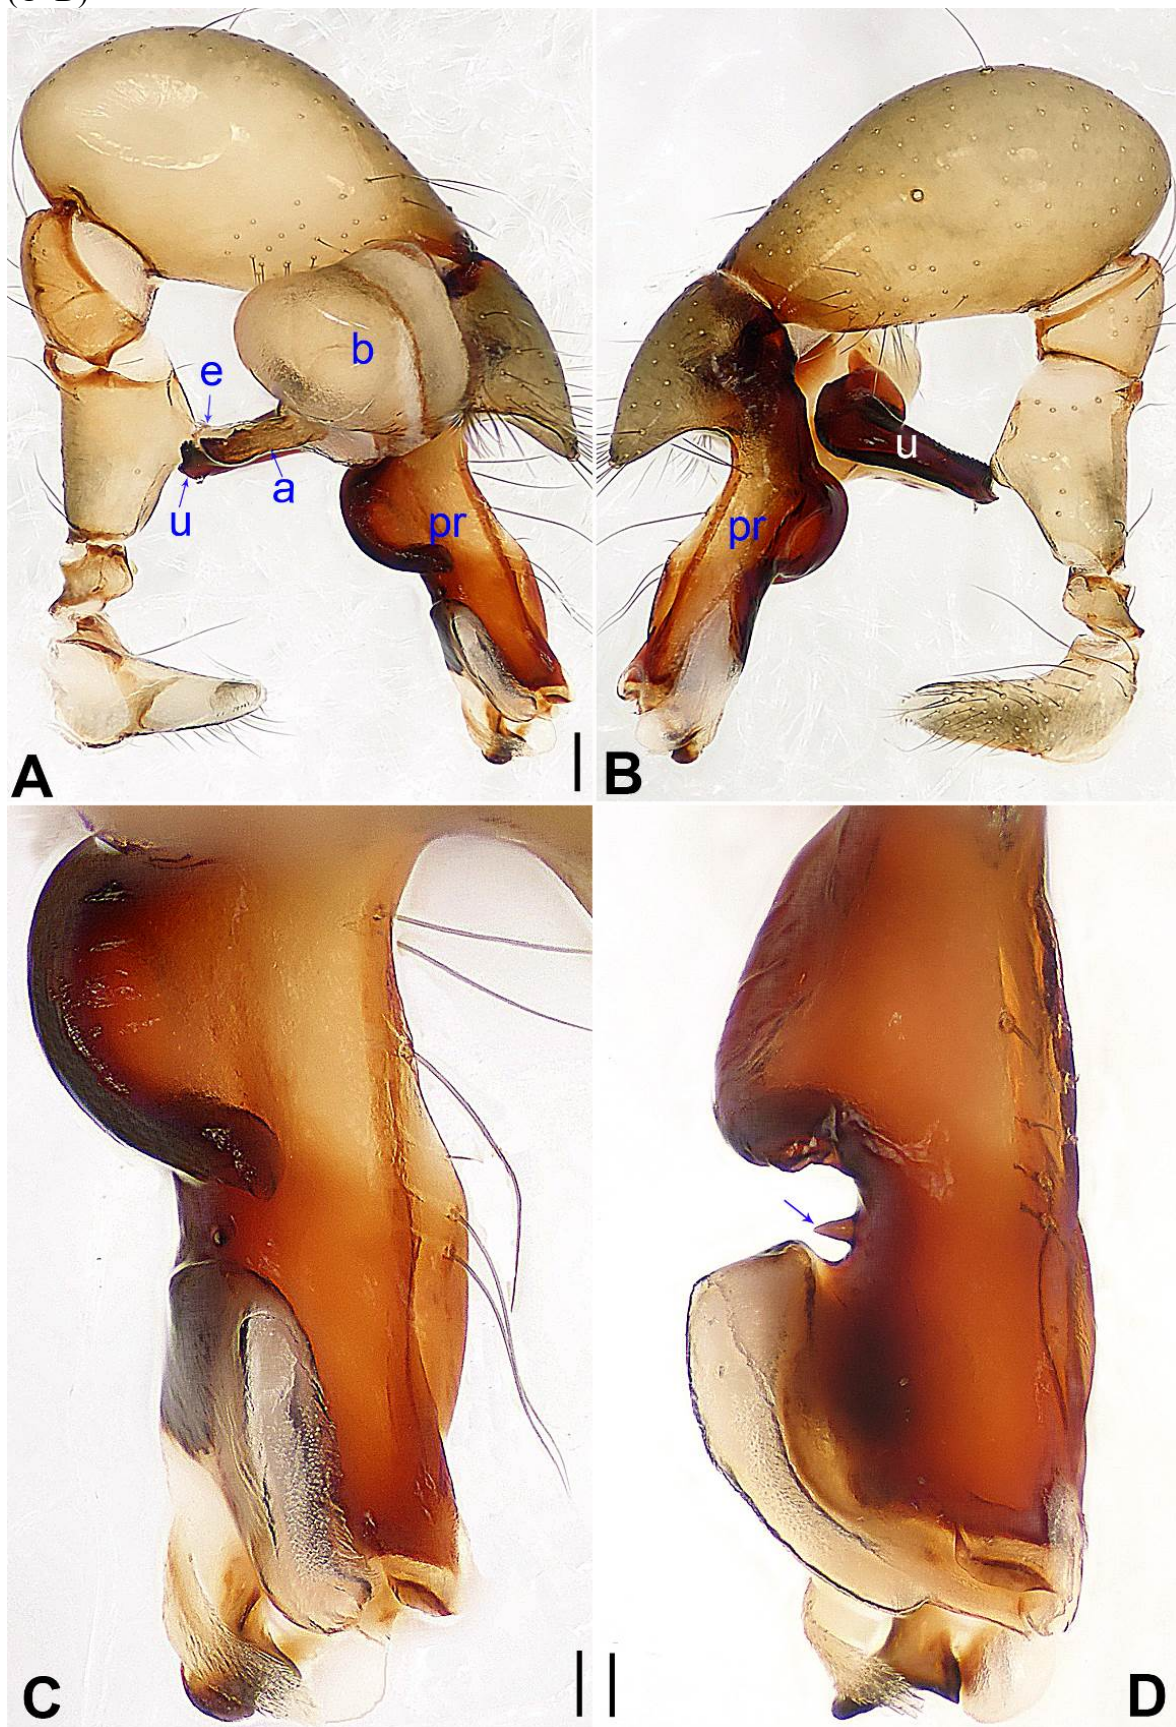



**Figure S10.** Illustrations of *Uthina huifengi* Yao & Li sp. nov., holotype male (A–B, D) and paratype female (C). A, bulbal apophyses, prolateral view; B–C, habitus, dorsal view; D, chelicerae, frontal view. Scale bars: 0.03 (A), 0.50 (B–C), 0.10 (D)

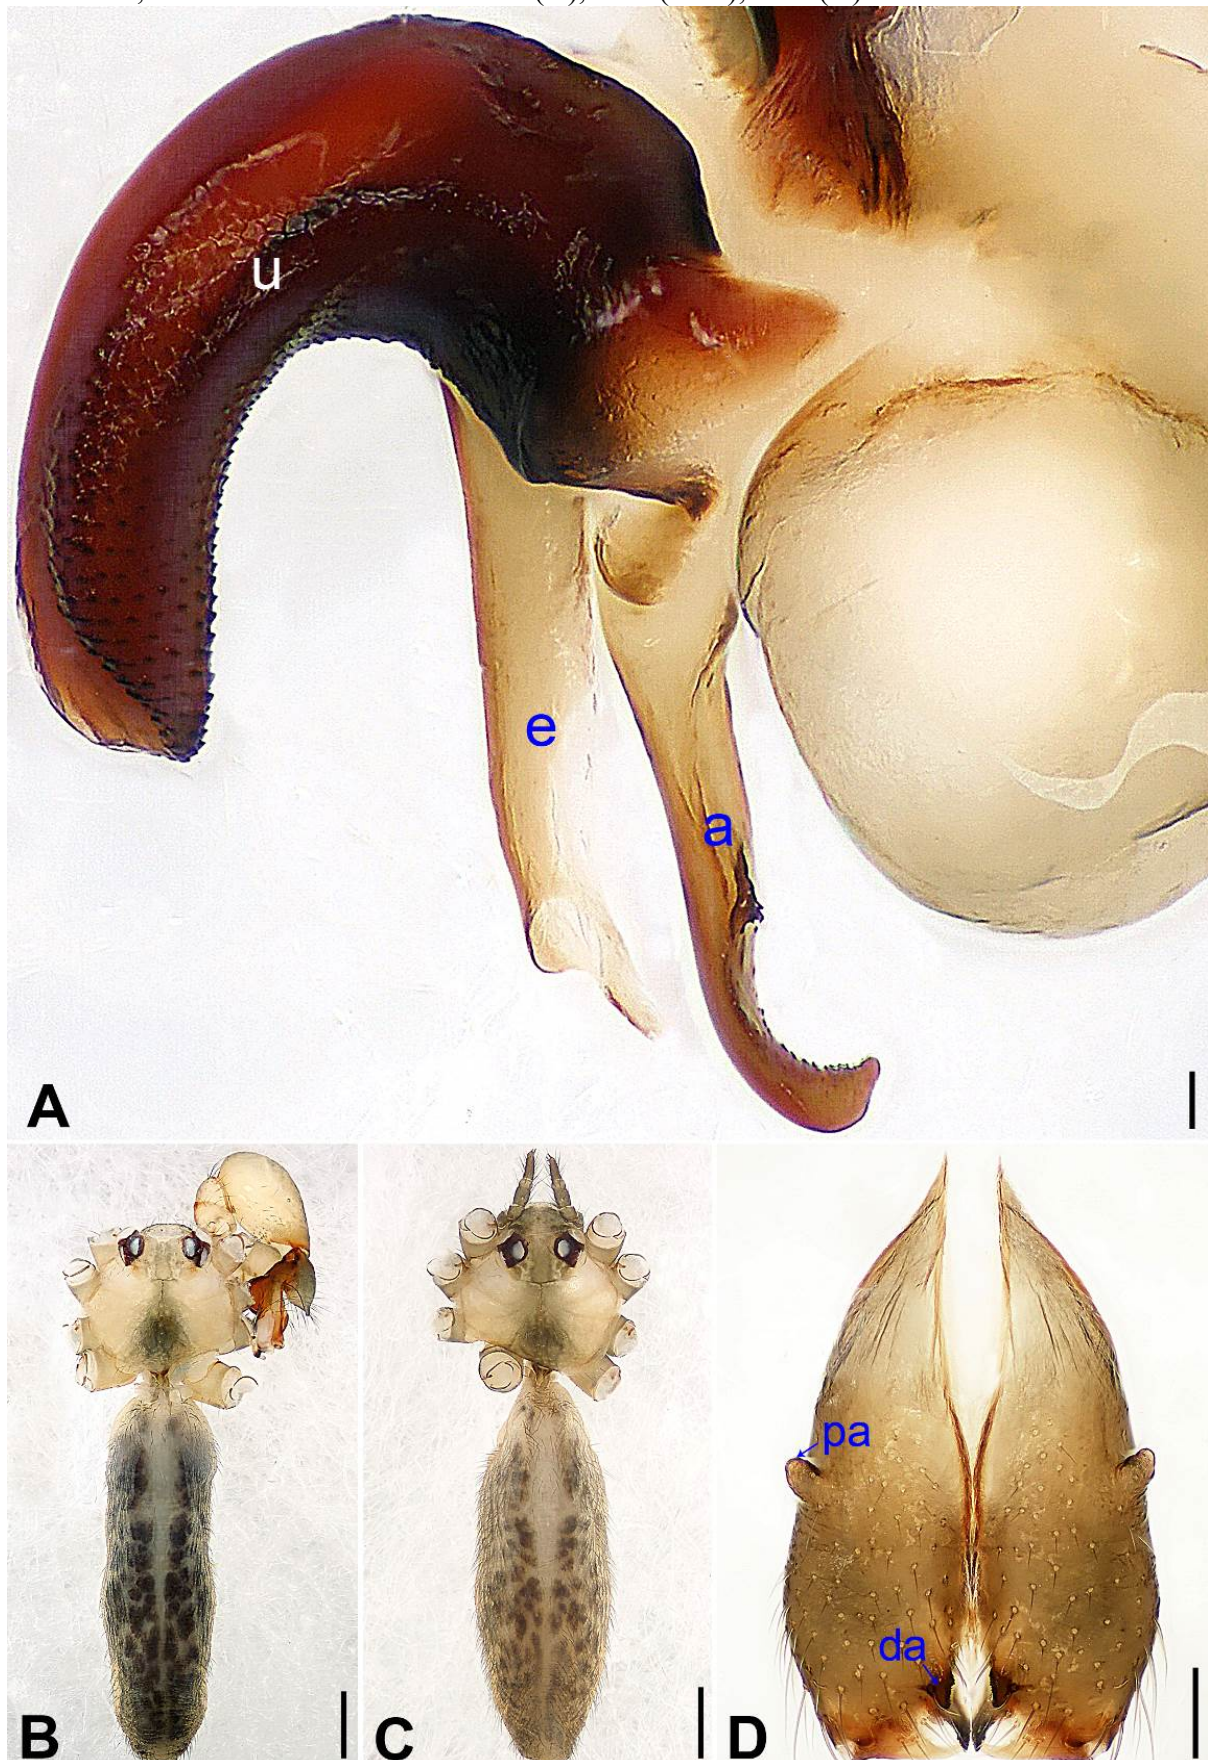

**Figure S11. Illustrations of *Uthina huifengi* Yao & Li sp. nov., paratype female. A, external genitalia, ventral view; B, vulva, dorsal view. Scale bars: 0.05**

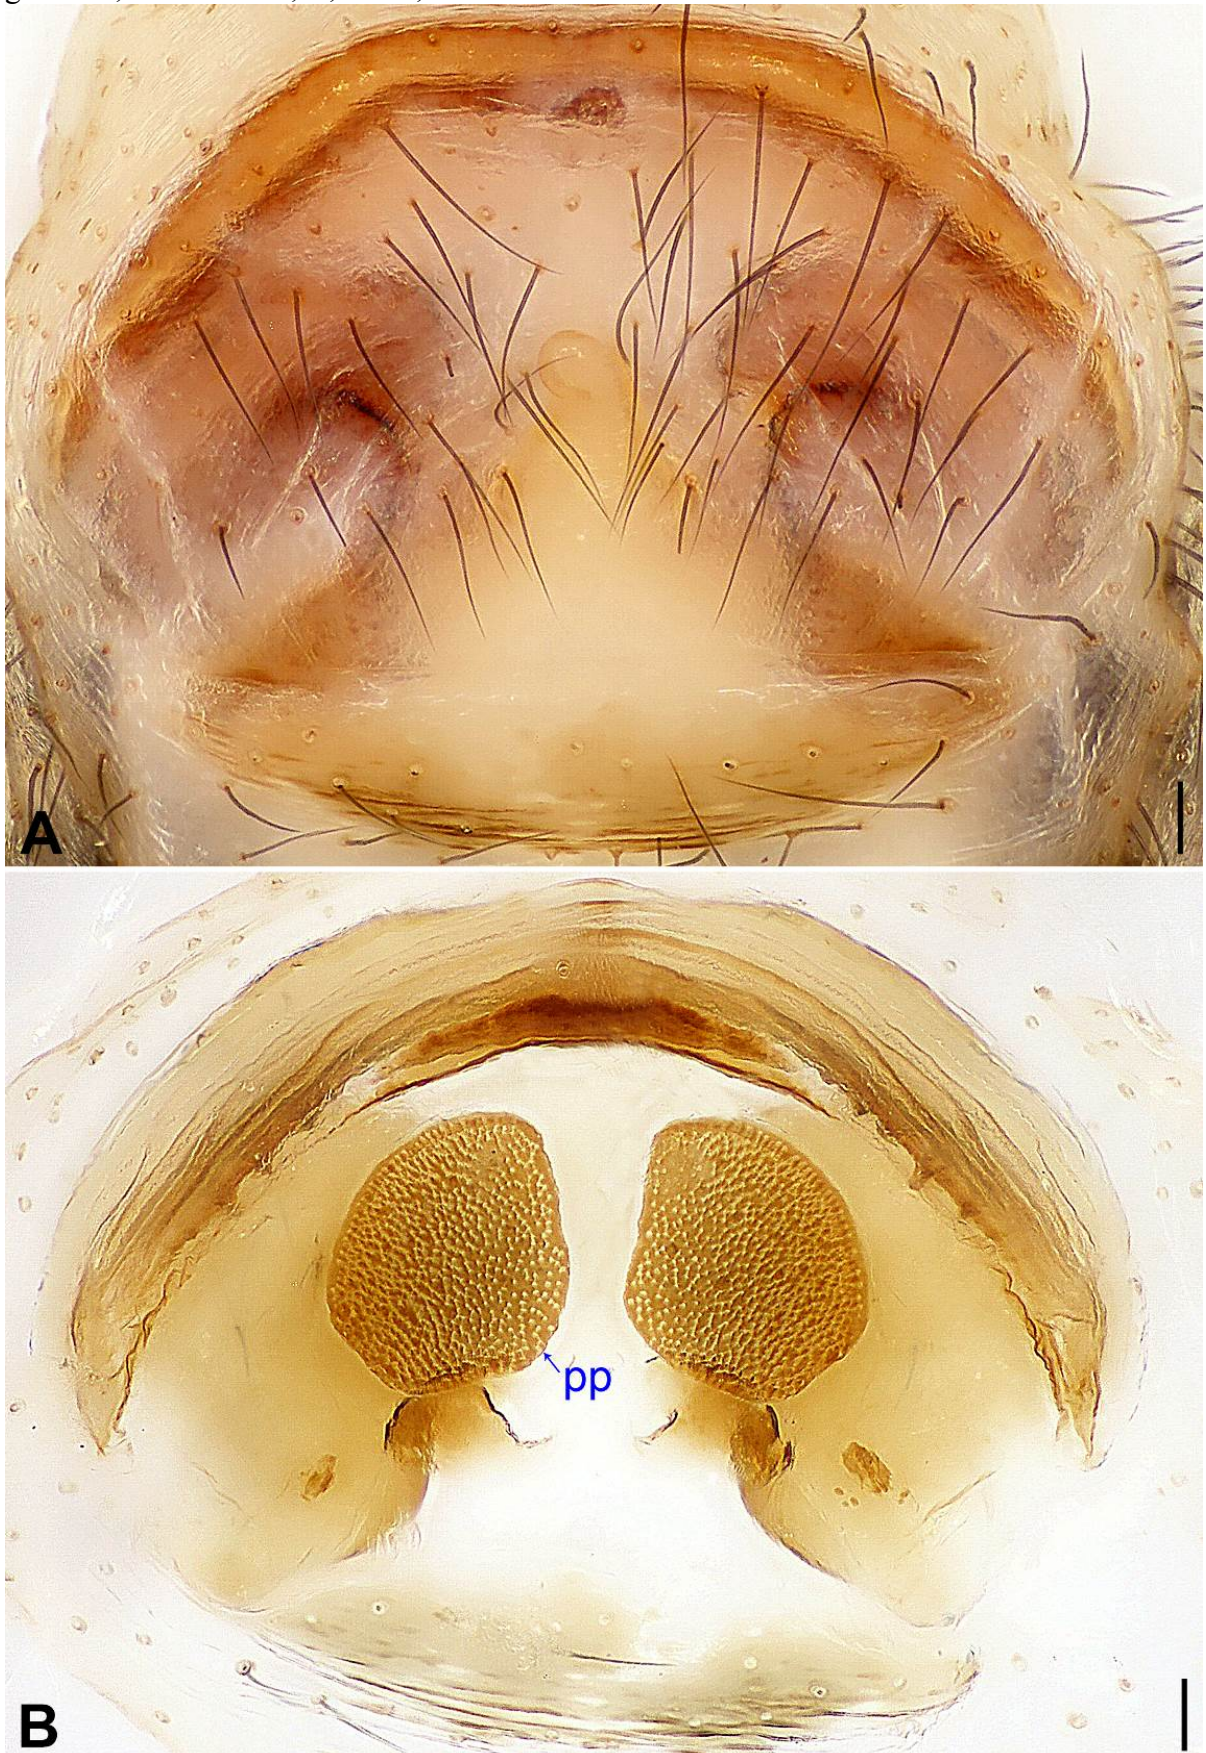

**Figure S12. Illustrations of *Uthina javaensis* Yao & Li sp. nov., holotype female.** A, external genitalia, ventral view; B, vulva, dorsal view; C–E, habitus (C, dorsal view; D, ventral view; E, lateral view). Scale bars: 0.10 (A–B), 1.00 (C–E)

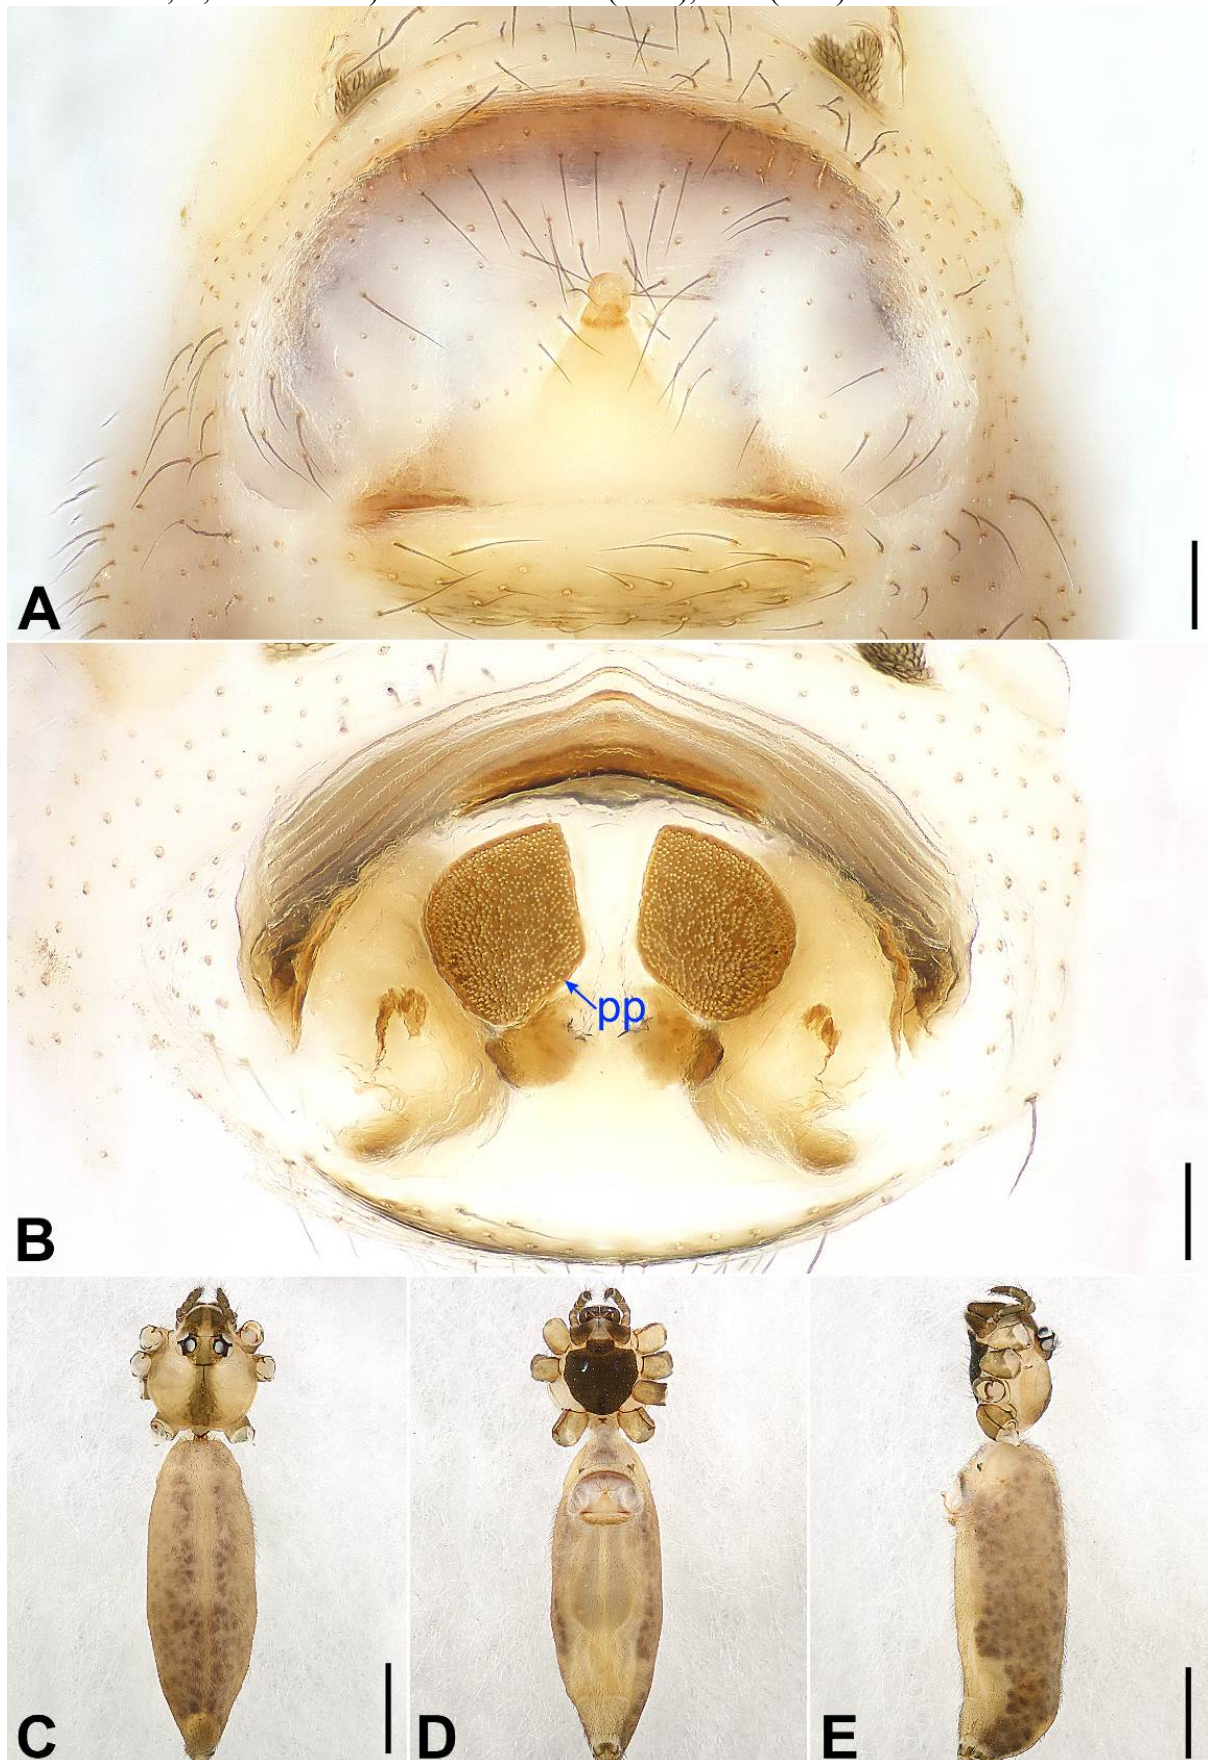

**Figure S13. Illustrations of *Uthina muangensis* Yao & Li sp. nov., holotype male. A–B, pedipalp (A, prolateral view; B, retrolateral view); C–D, distal part of procurus (C, prolateral view; D, dorsal view). Scale bars: 0.20 (A–B), 0.05 (C–D)**

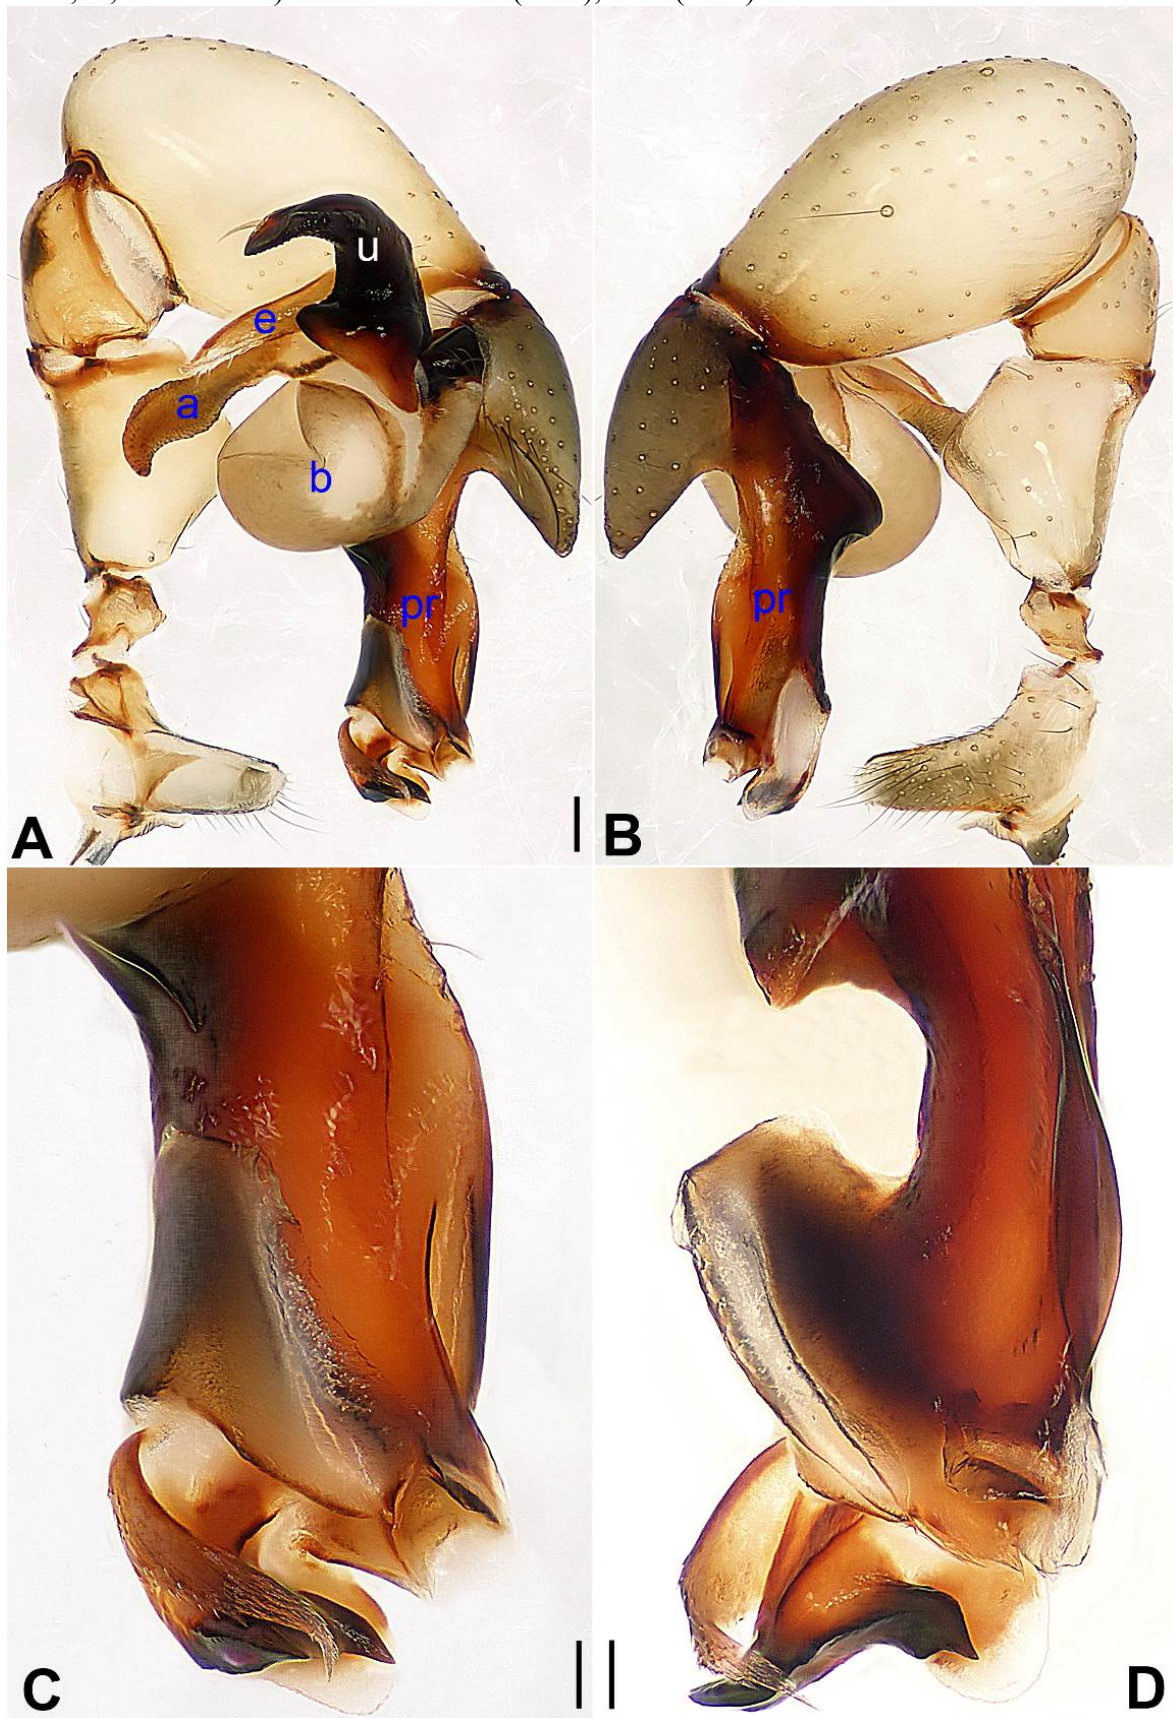

**Figure S14. Illustrations of *Uthina muangensis* Yao & Li sp. nov., holotype male (A–B, D) and paratype female (C). A, bulbal apophyses, prolateral view; B–C, habitus, dorsal view; D, chelicerae, frontal view. Scale bars: 0.05 (A), 0.50 (B–C), 0.10 (D)**

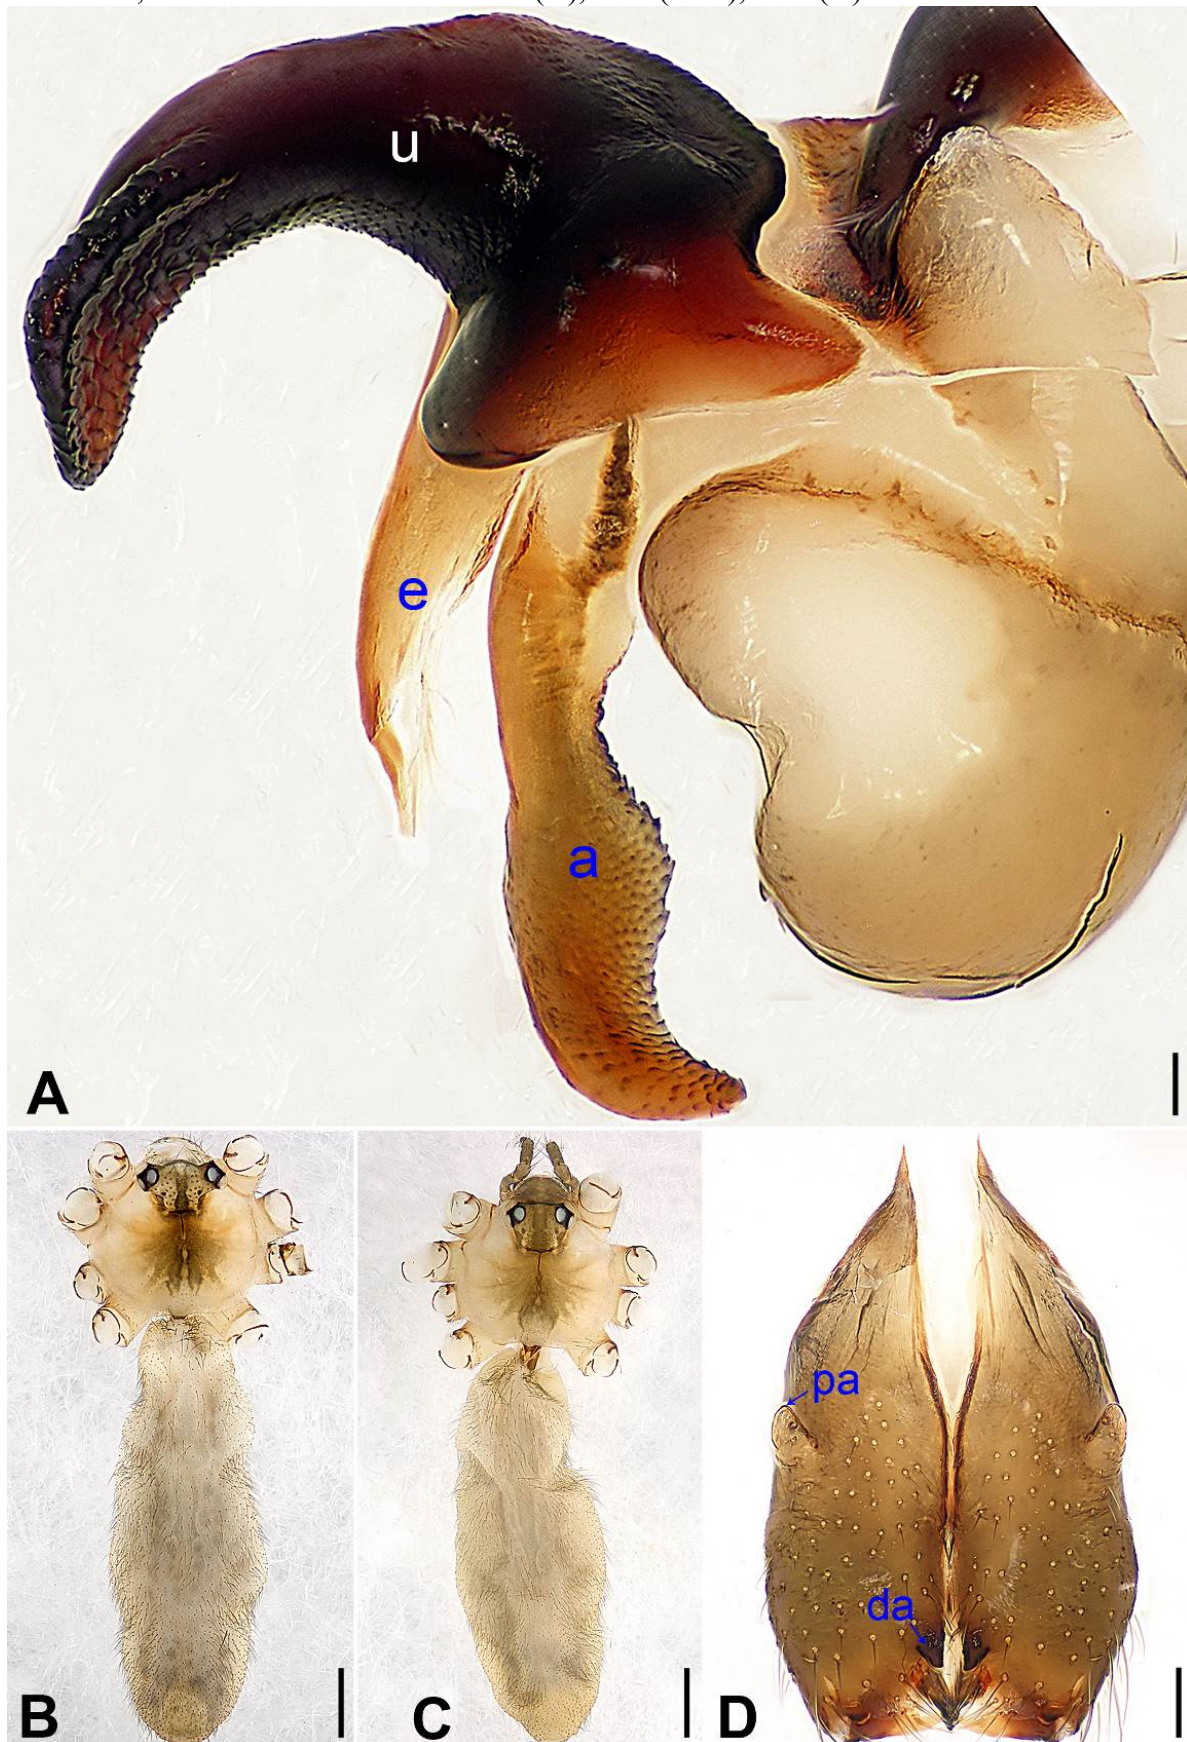

**Figure S15.** Illustrations of *Uthina muangensis* Yao & Li sp. nov., paratype female. A, external genitalia, ventral view; B, vulva, dorsal view. Scale bars: 0.05

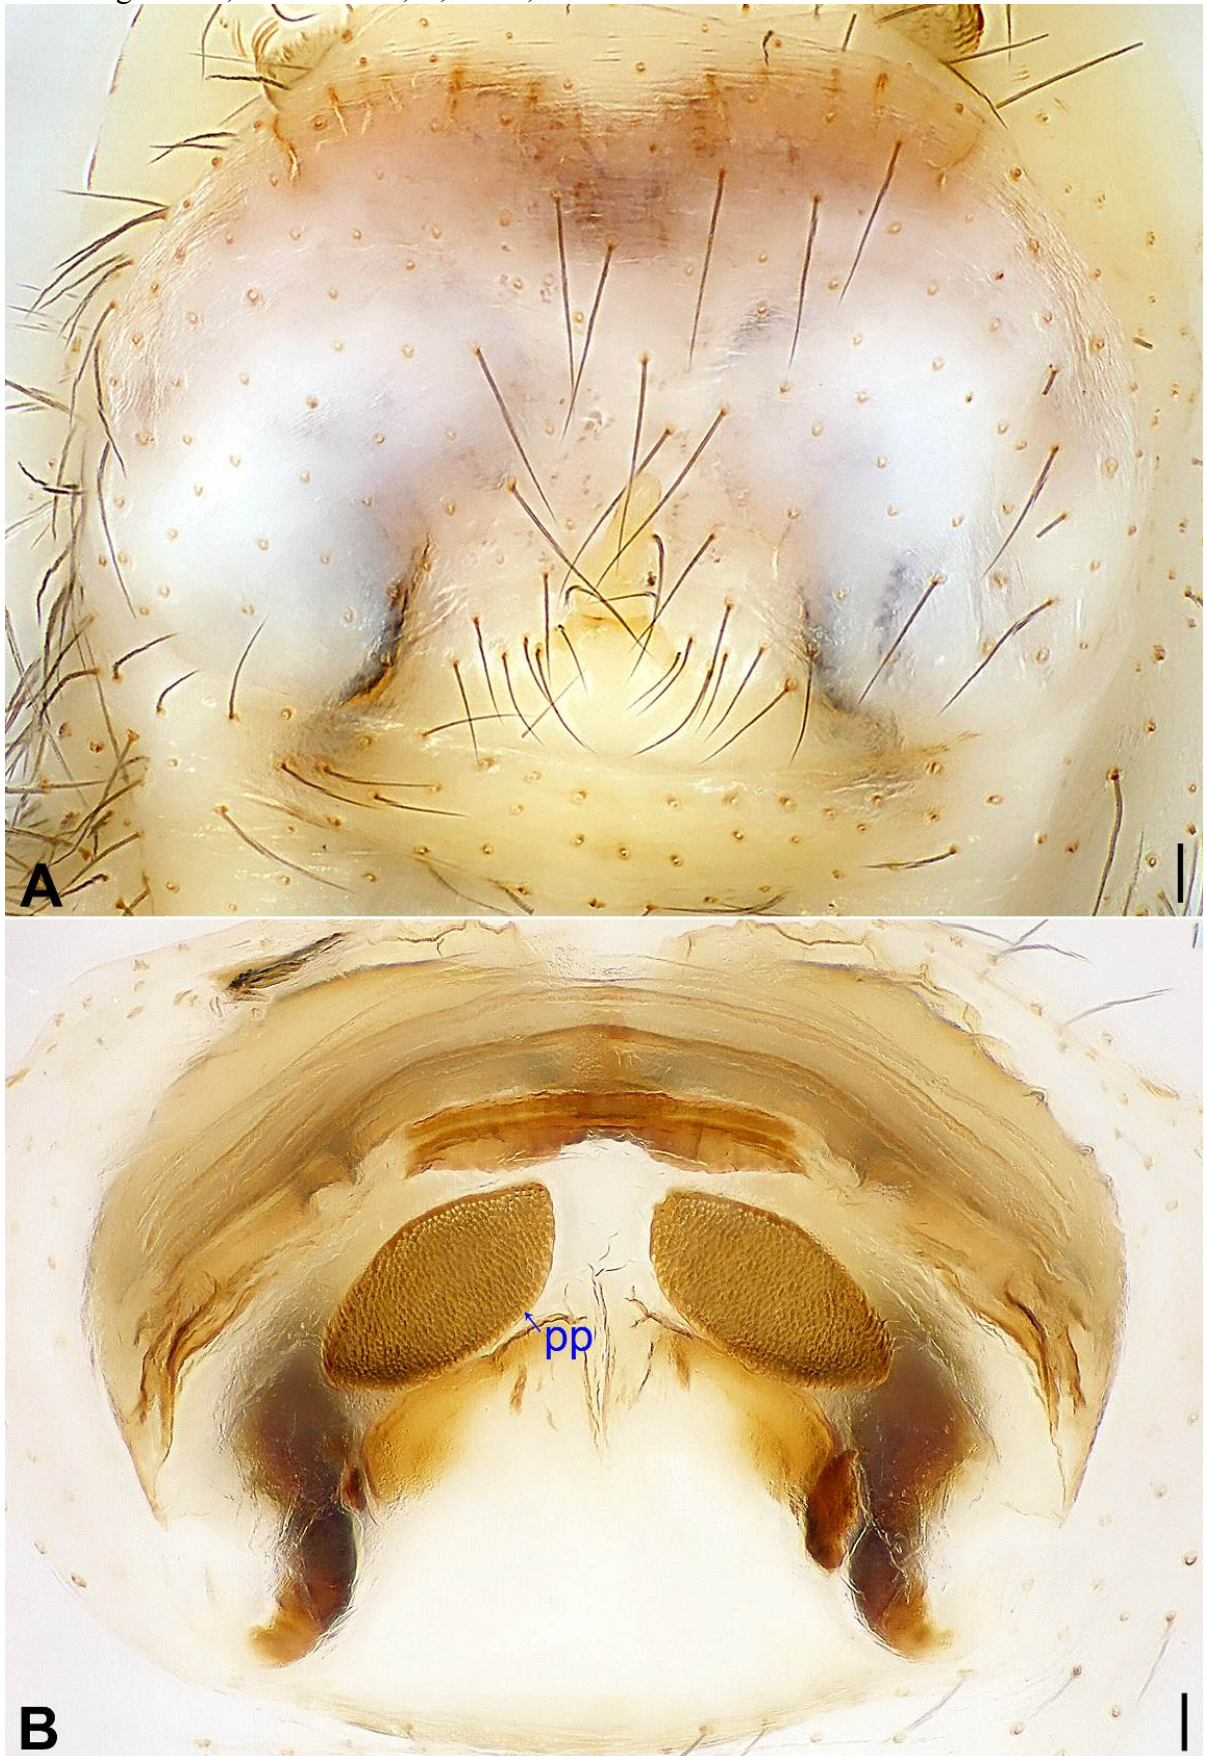

**Figure S16. Illustrations of *Uthina potharamensis* Yao & Li sp. nov., holotype male.** A–B, pedipalp (A, prolateral view; B, retrolateral view); C–D, distal part of procurus (C, prolateral view; D, dorsal view, arrow points at membranous lamella). Scale bars: 0.15 (A–B), 0.05 (C), 0.03 (D)

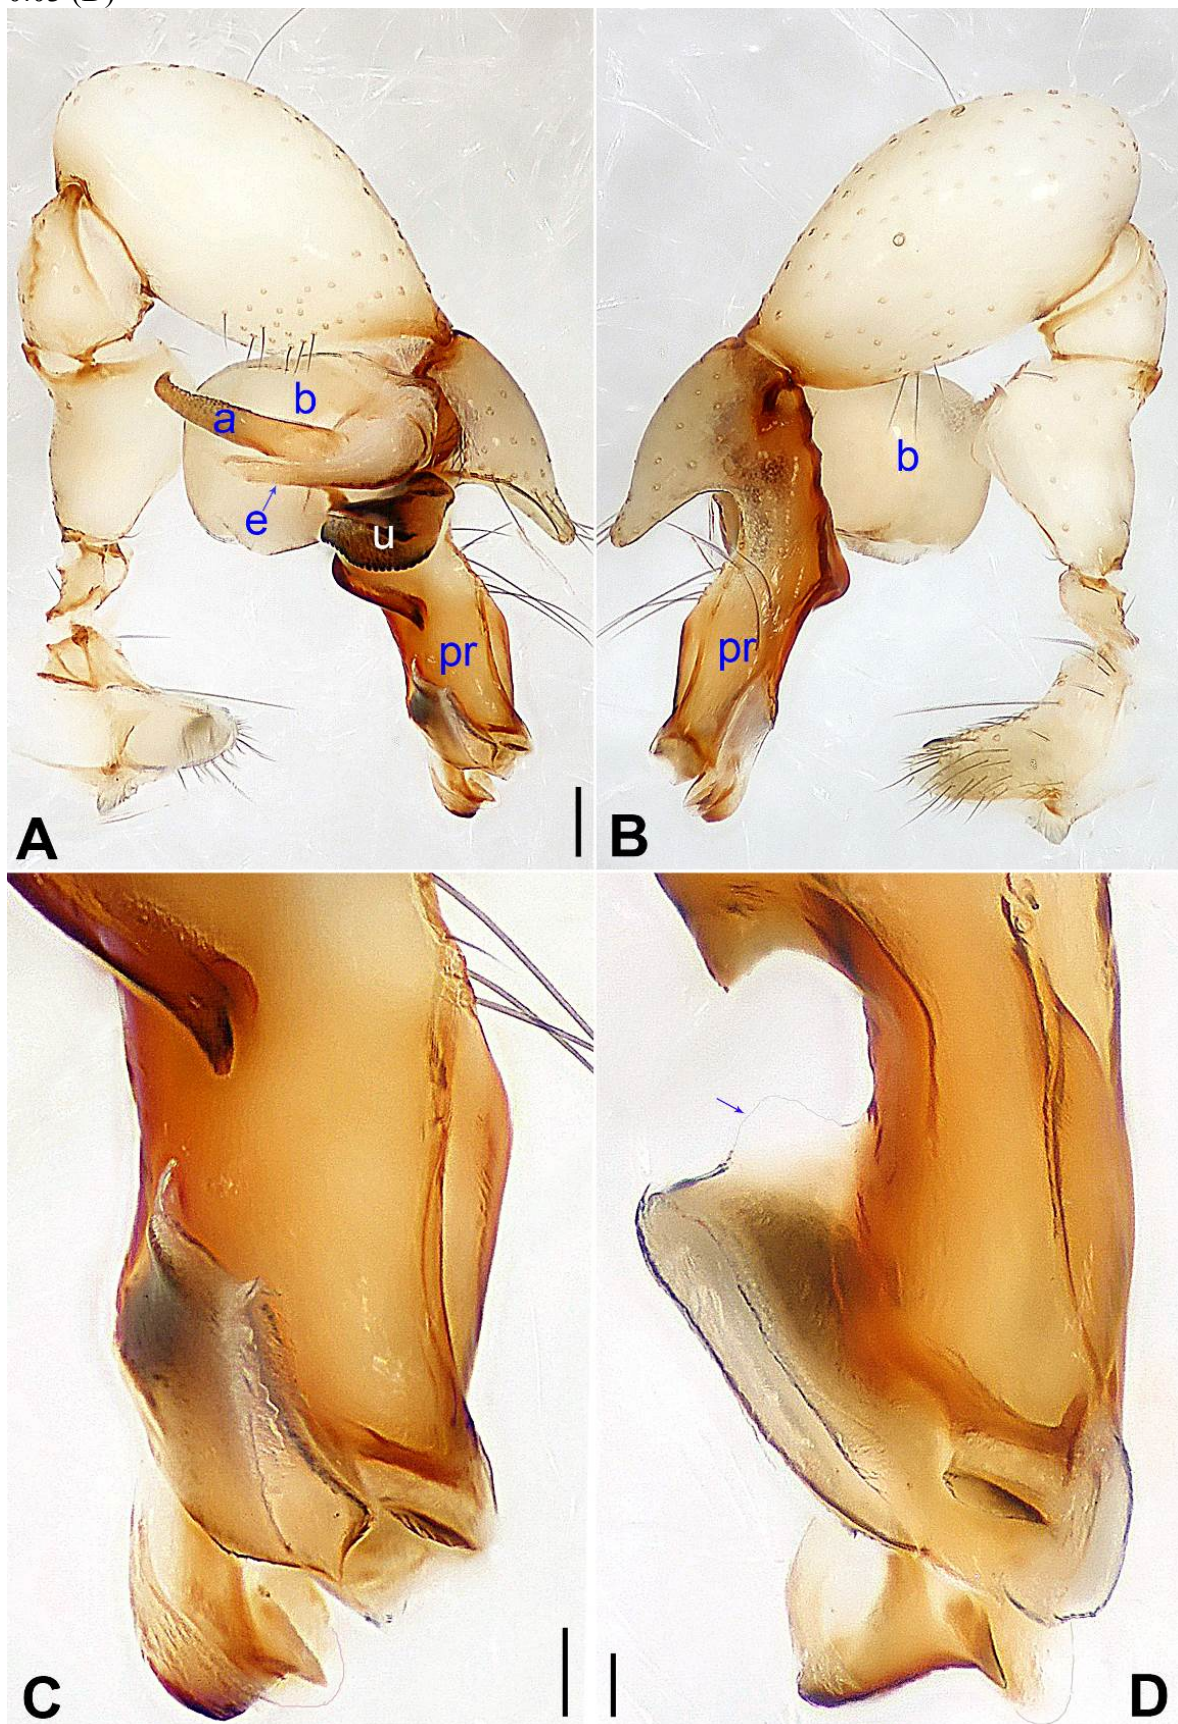

**Figure S17. Illustrations of *Uthina potharamensis* Yao & Li sp. nov., holotype male (A–B, D) and paratype female (C). A, bulbal apophyses, prolateral view; B–C, habitus, dorsal view; D, chelicerae, frontal view. Scale bars: 0.03 (A), 0.50 (B–C), 0.10 (D)**

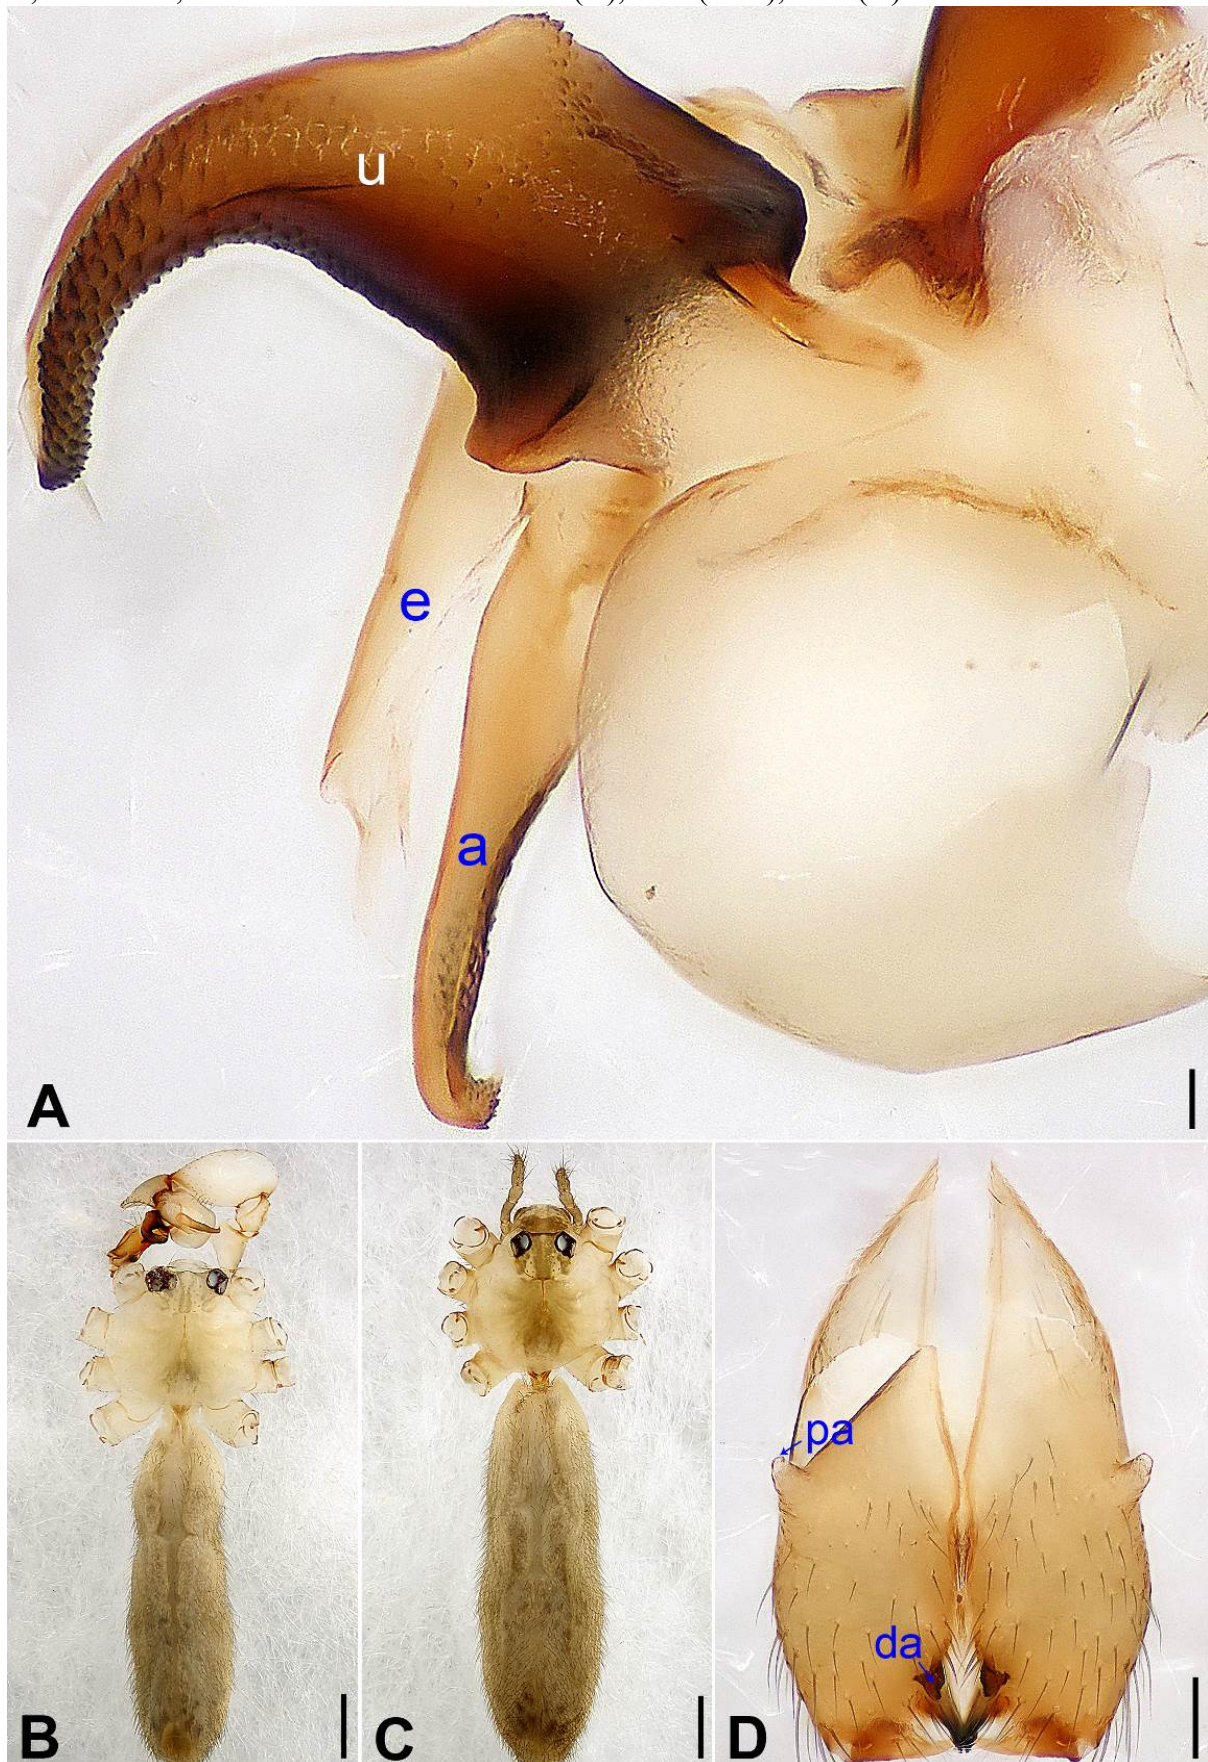



**Figure S18. Illustrations of *Uthina potharamensis* Yao & Li sp. nov., paratype female. A, external genitalia, ventral view; B, vulva, dorsal view. Scale bars: 0.05**

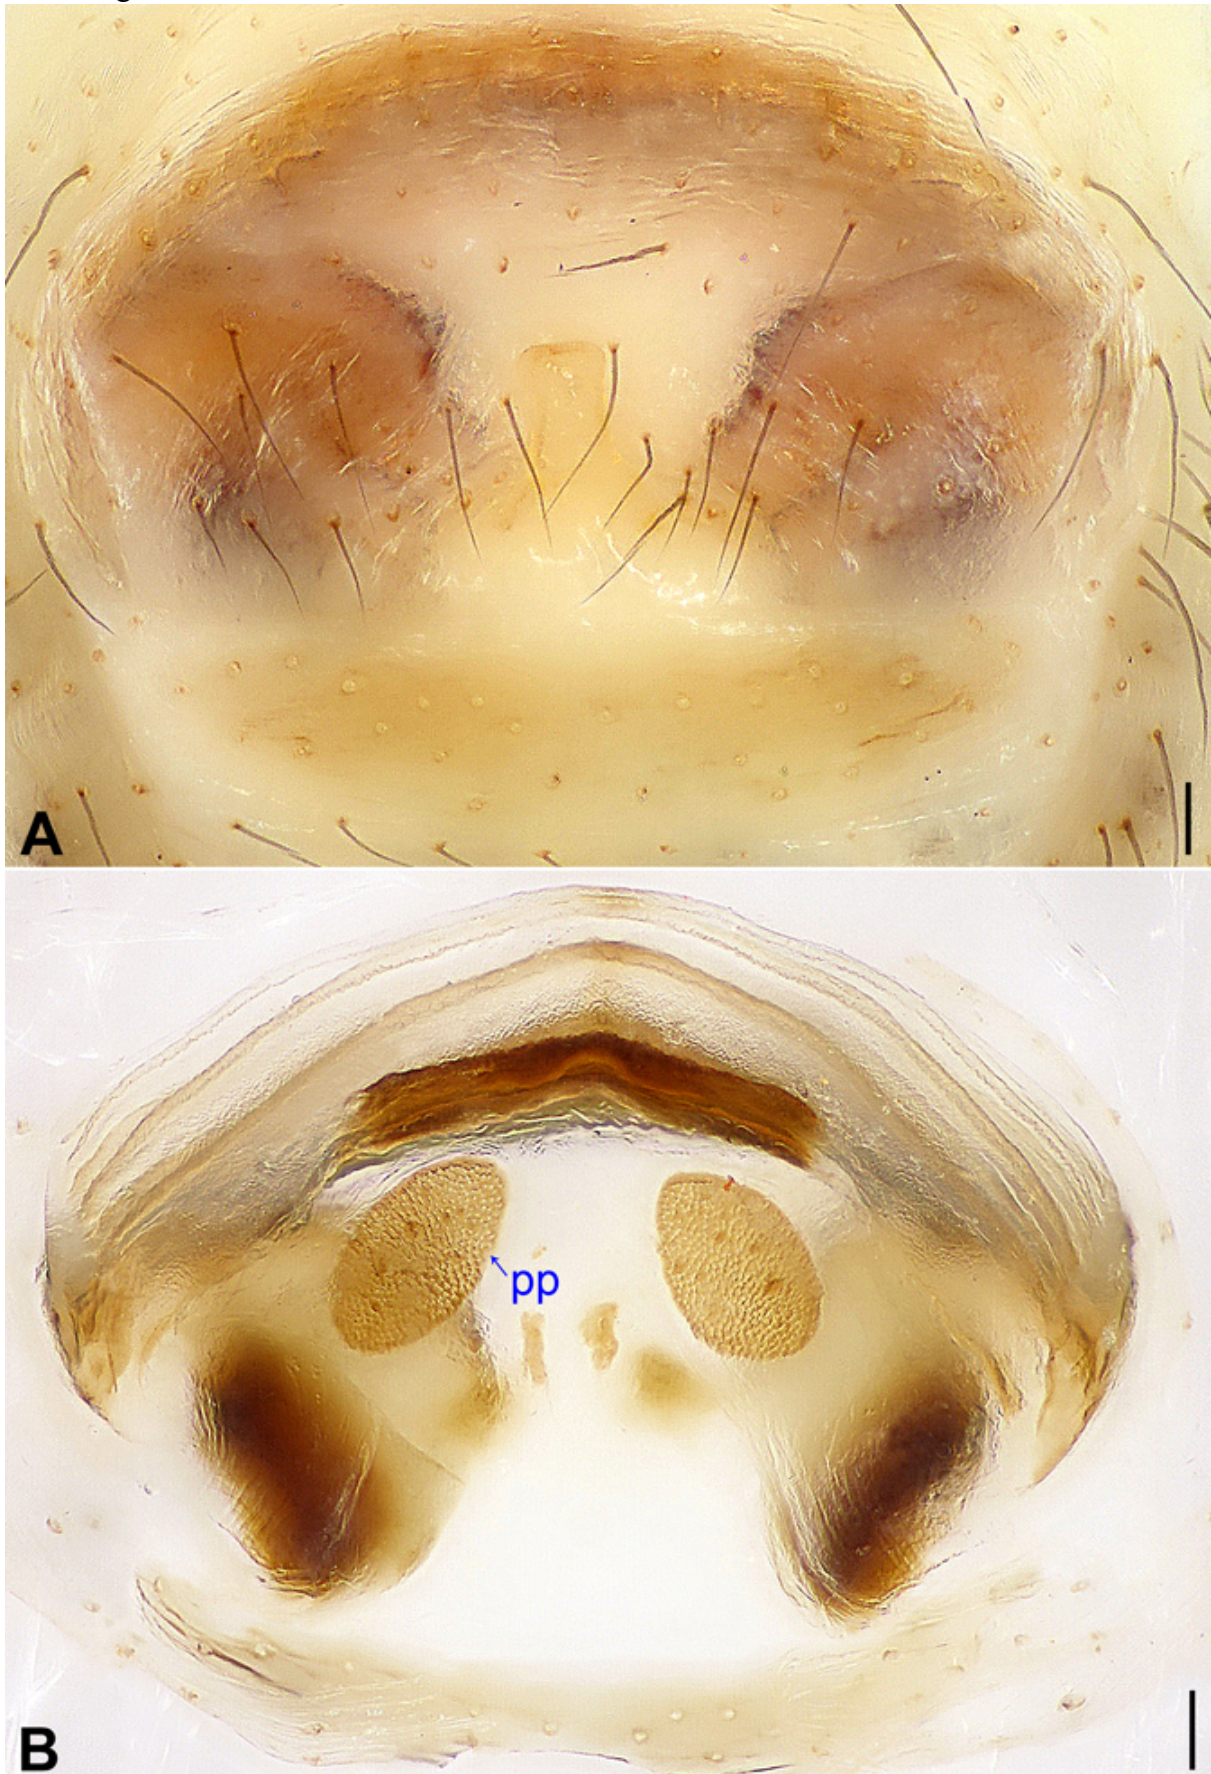

**Figure S19. Illustrations of *Uthina saiyokensis* Yao & Li sp. nov., holotype male.** A–B, pedipalp (A, prolateral view; B, retrolateral view); C–D, distal part of procurus (C, prolateral view; D, dorsal view). Scale bars: 0.20 (A–B), 0.05 (C–D)

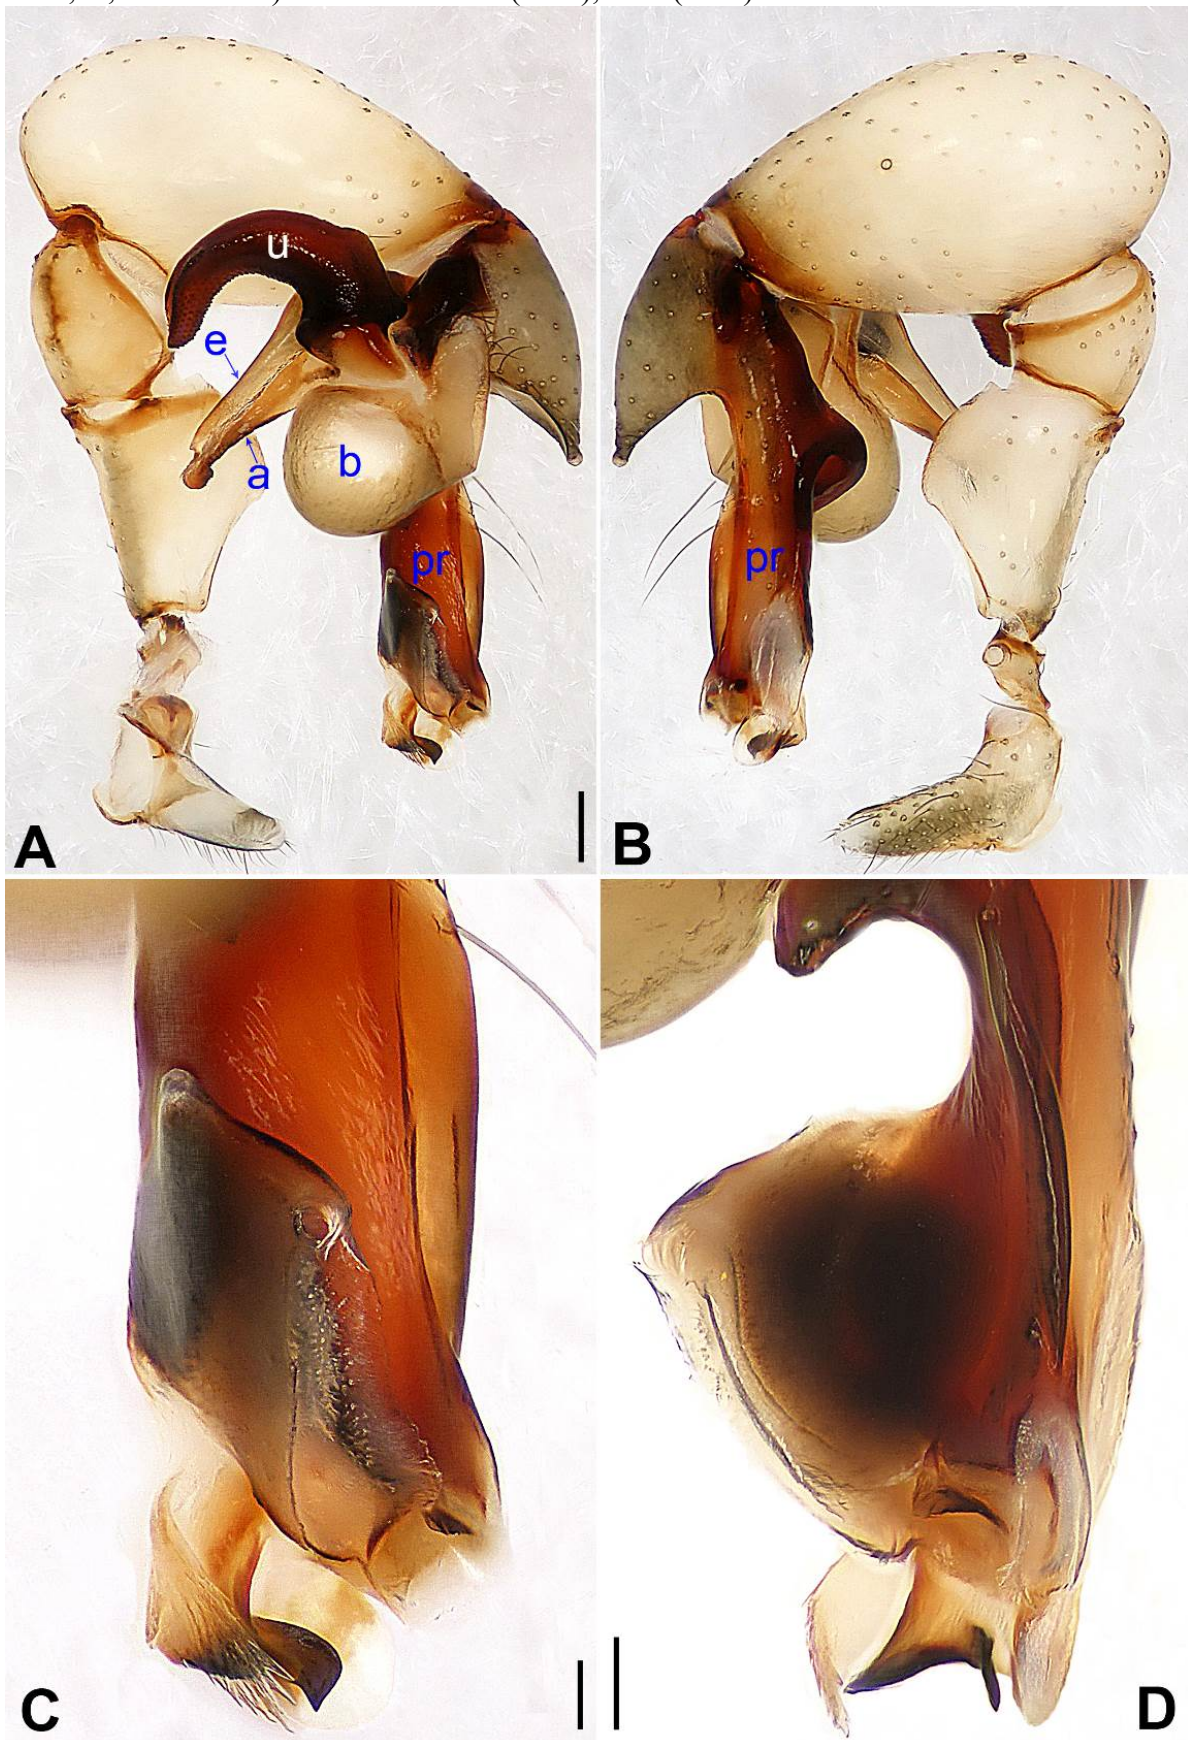

**Figure S20. Illustrations of *Uthina saiyokensis* Yao & Li sp. nov.**, holotype male (A–B, D) and paratype female (C). A, bulbal apophyses, prolateral view, arrow points at distinct proximal apophysis on uncus; B–C, habitus, dorsal view; D, chelicerae, frontal view. Scale bars: 0.05 (A), 0.50 (B–C), 0.10 (D)

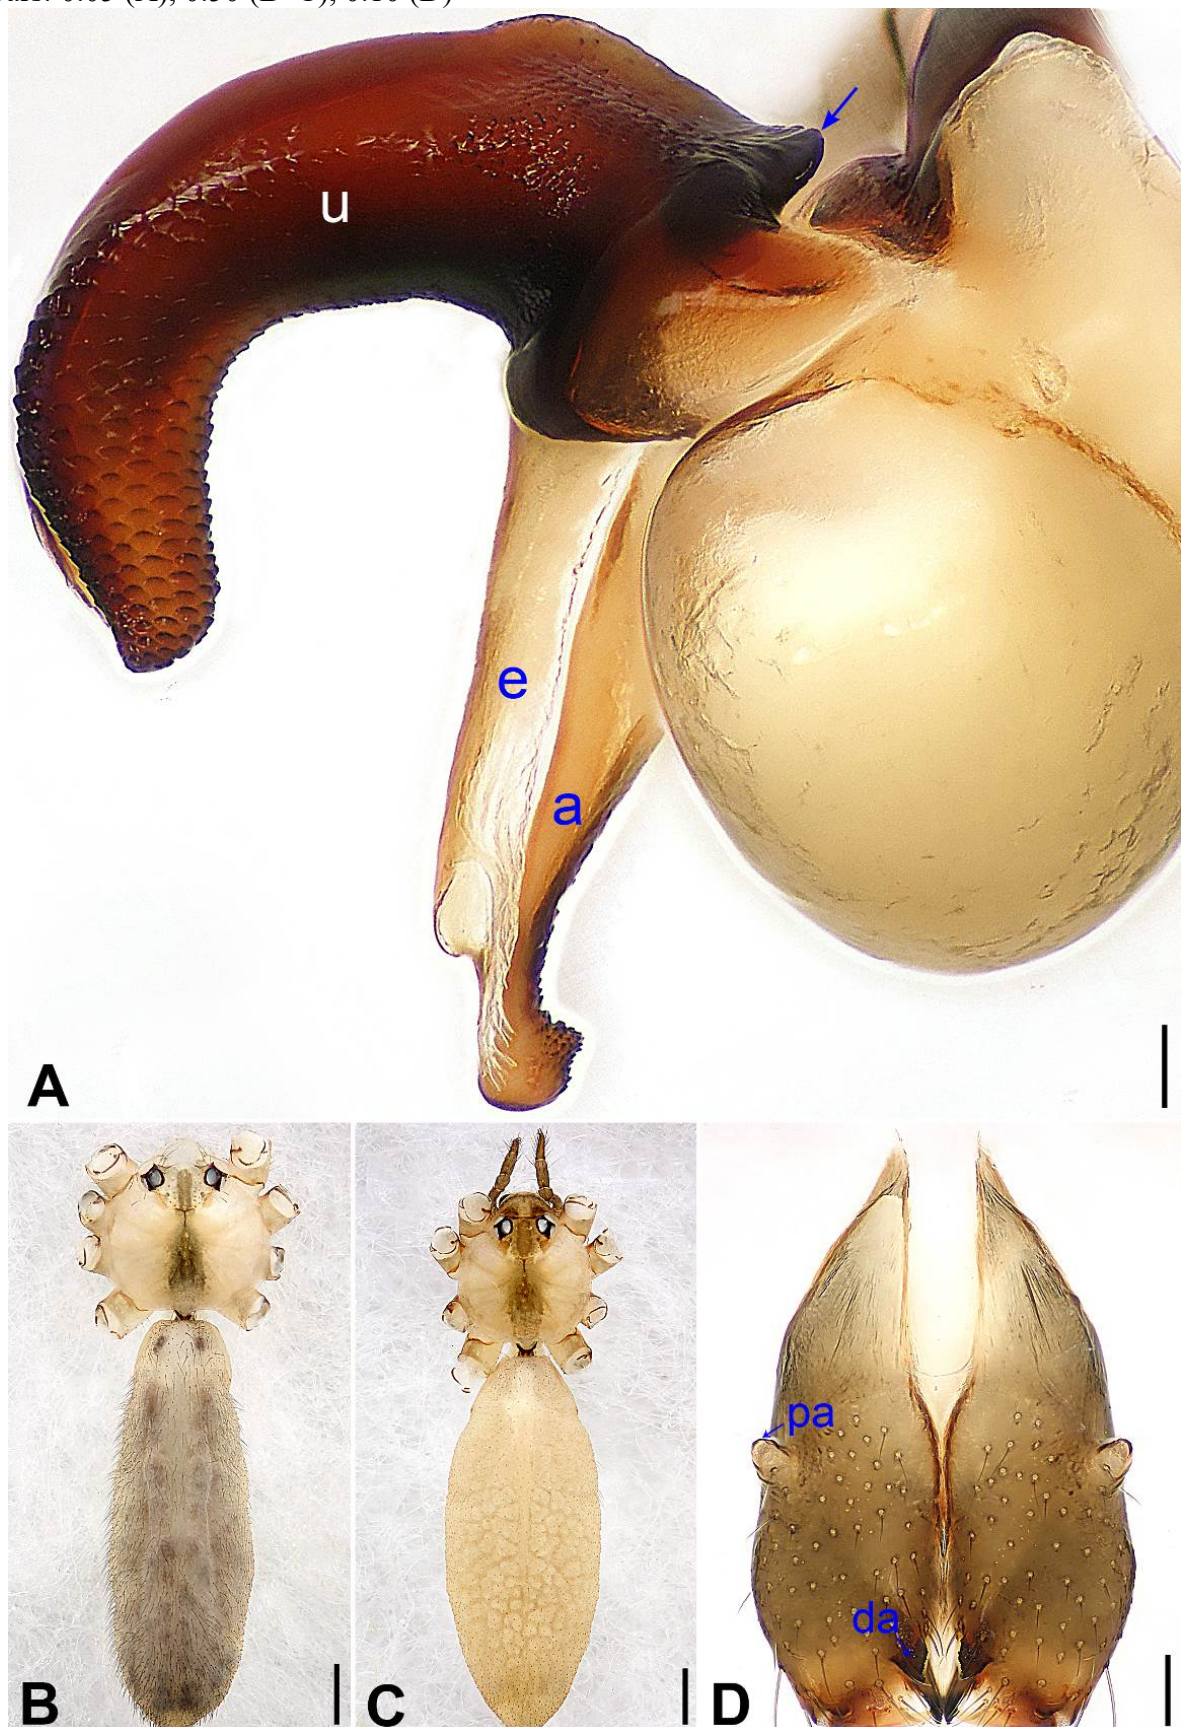

**Figure S21. Illustrations of *Uthina sai yokensis* Yao & Li sp. nov., paratype female. A, external genitalia, ventral view; B, vulva, dorsal view. Scale bars: 0.05**

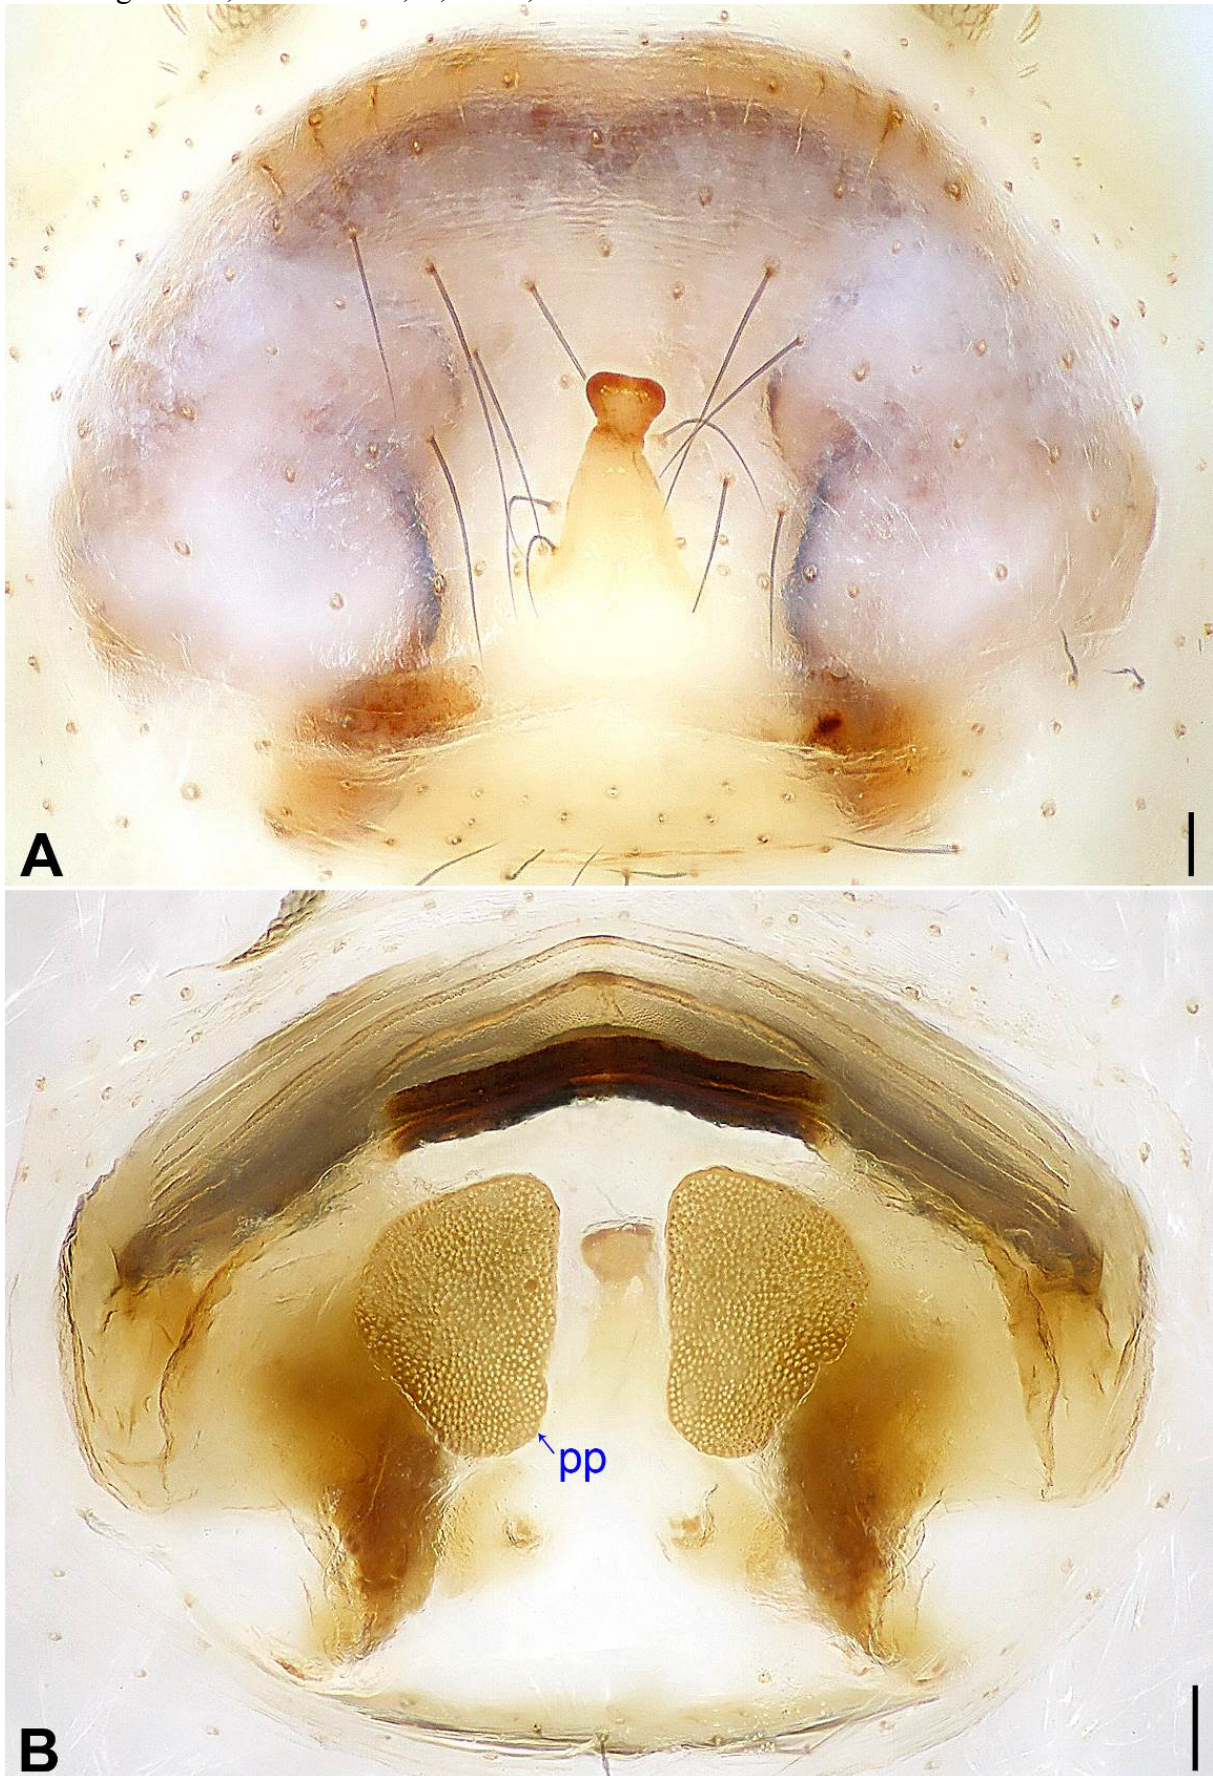

**Figure S22. Illustrations of *Uthina sarikaensis* Yao & Li sp. nov., holotype female.** A, external genitalia, ventral view; B, vulva, dorsal view; C–E, habitus (C, dorsal view; D, ventral view; E, lateral view). Scale bars: 0.05 (A–B), 0.50 (C–E)

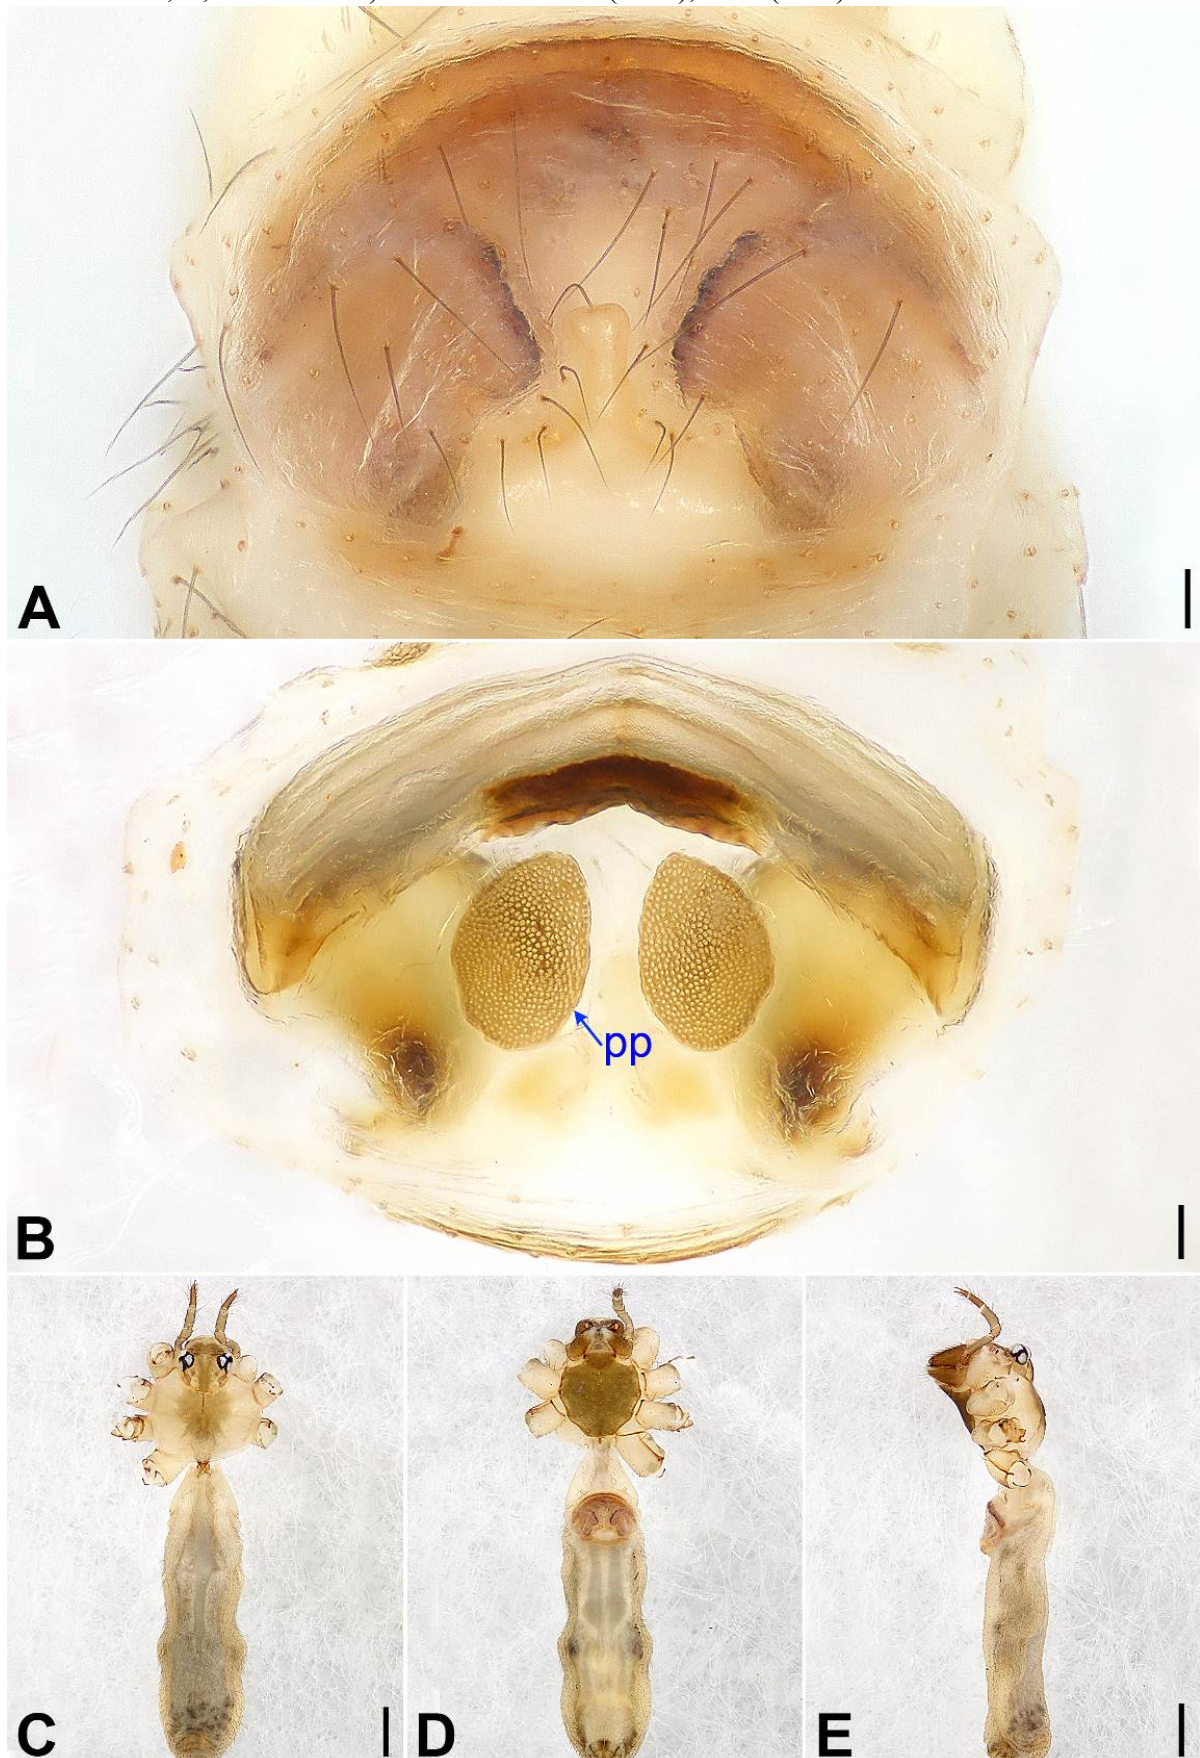

**Figure S23. Illustrations of *Uthina sulawesiensis* Yao & Li sp. nov., holotype male.** A–B, pedipalp (A, prolateral view; B, retrolateral view); C–D, distal part of procurus (C, prolateral view; D, dorsal view, arrow points at large angular apophysis). Scale bars: 0.10 (A–B), 0.05 (C–D)

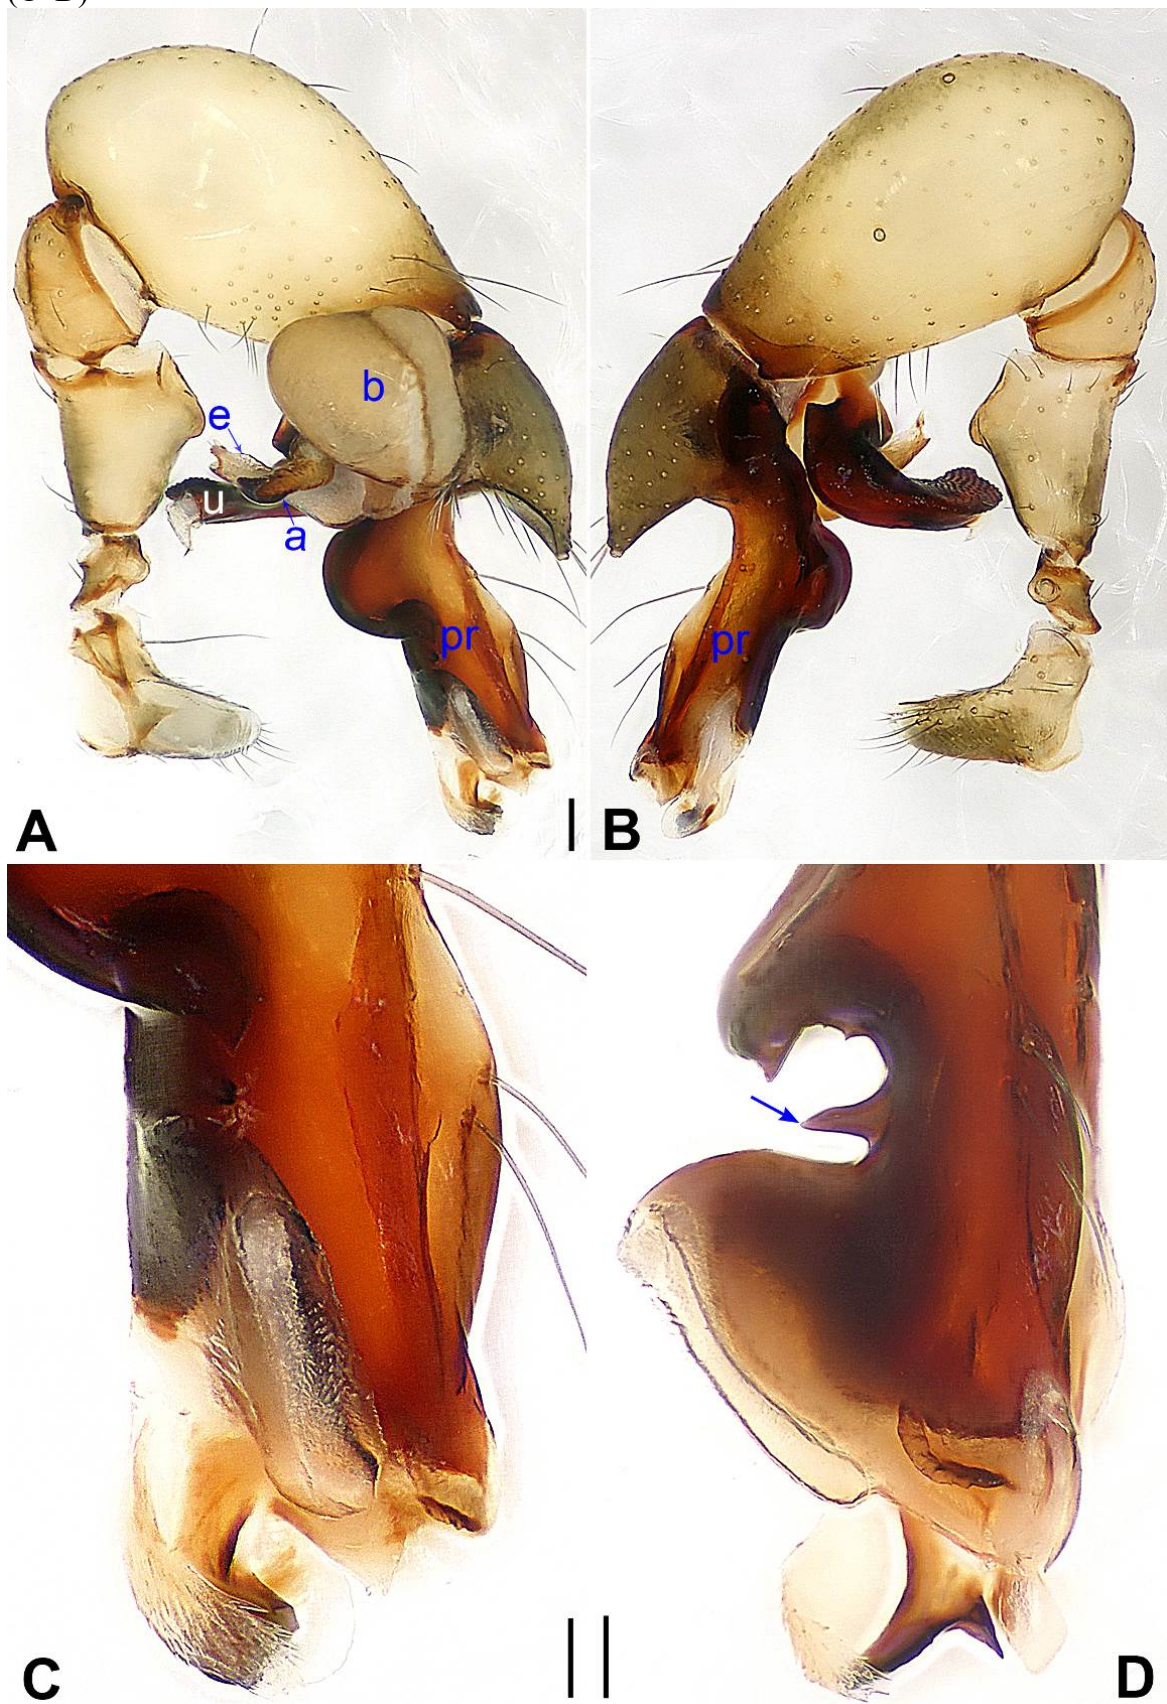

**Figure S24. Illustrations of *Uthina sulawesiensis* Yao & Li sp. nov.**, holotype male (A–B, D) and paratype female (C). A, bulbal apophyses, prolateral view; B–C, habitus, dorsal view; D, chelicerae, frontal view. Scale bars: 0.10 (A, D), 0.50 (B–C)

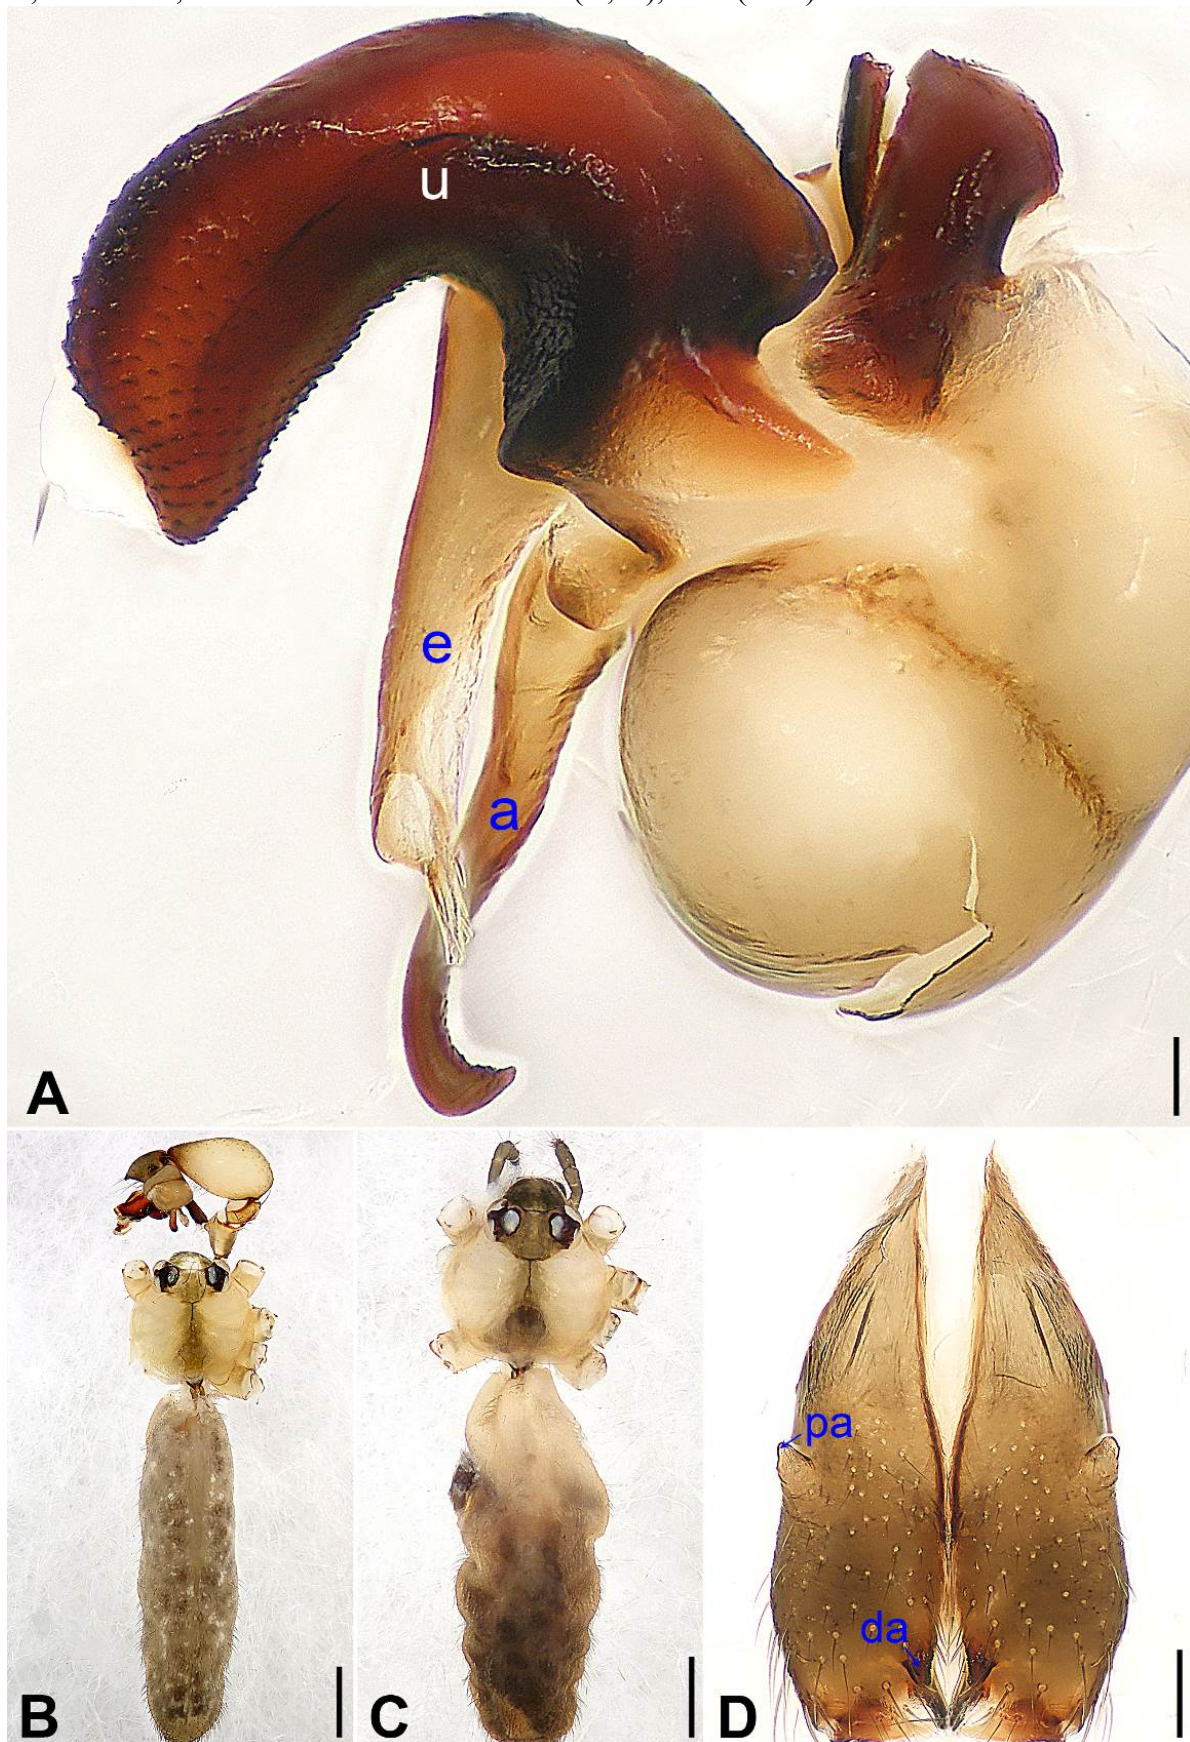

**Figure S25.** Illustrations of *Uthina sulawesiensis* Yao & Li sp. nov., paratype female. A, external genitalia, ventral view; B, vulva, dorsal view. Scale bars: 0.05

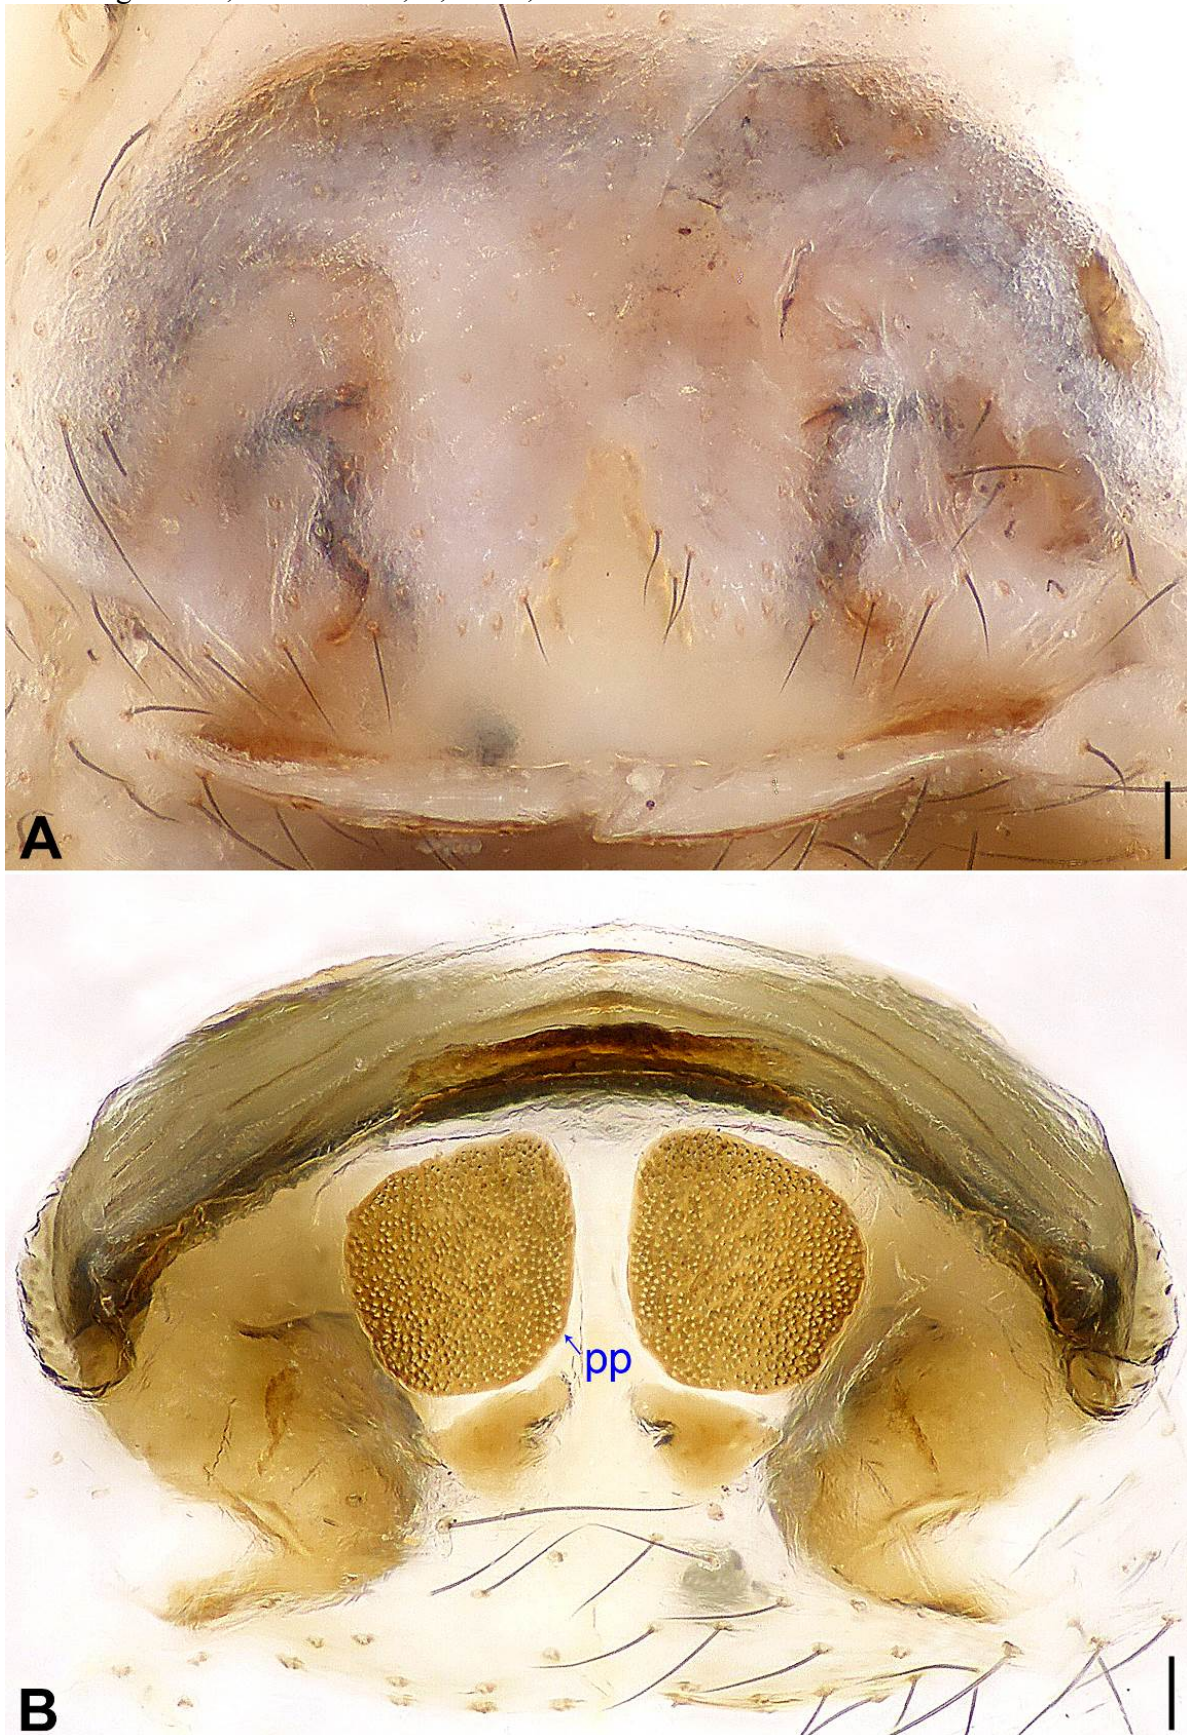



**Figure S26. Illustrations of *Uthina wongpromi* Yao & Li sp. nov., holotype male.** A–B, pedipalp (A, prolateral view; B, retrolateral view); C–D, distal part of procurus (C, prolateral view; D, dorsal view, arrow points at large bifurcated apophysis). Scale bars: 0.15 (A–B), 0.05 (C–D)

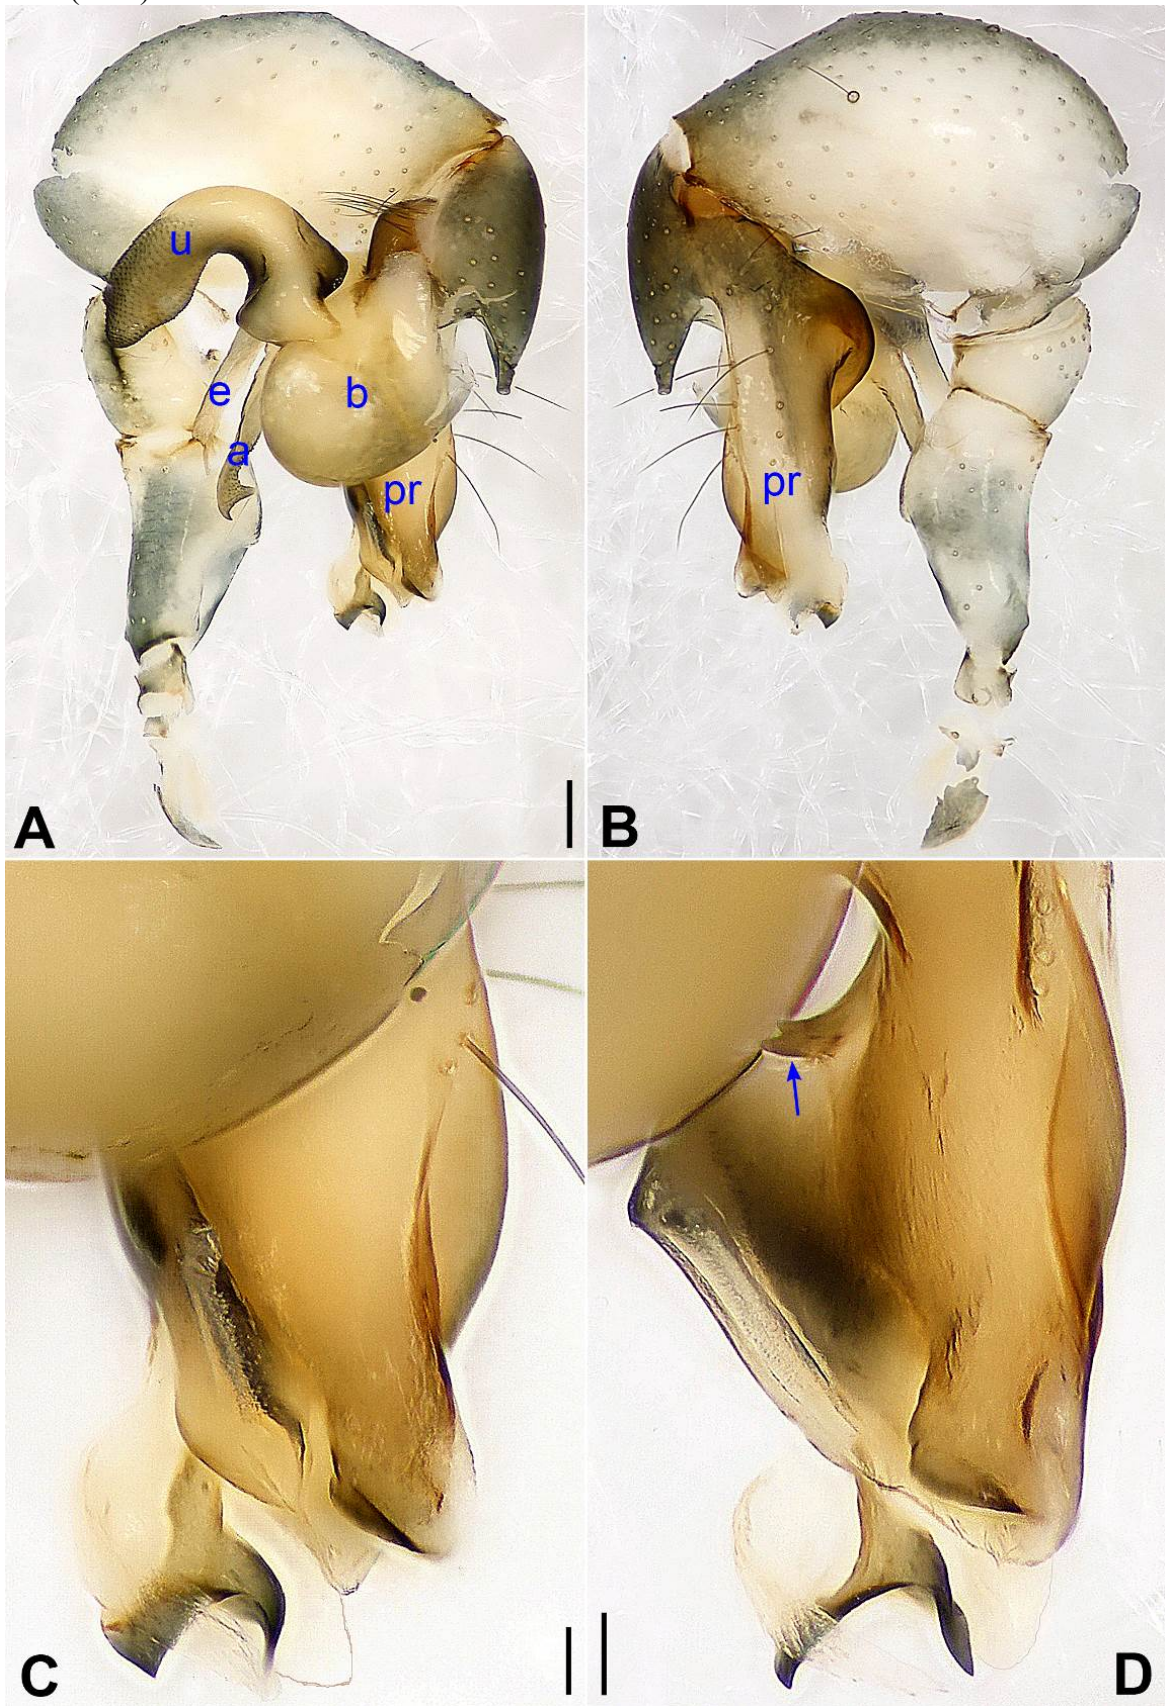

**Figure S27. Illustrations of *Uthina wongpromi* Yao & Li sp. nov., holotype male.** A, bulbal apophyses, prolateral view; B, habitus, dorsal view; C, chelicerae, frontal view. Scale bars: 0.10 (A, C), 0.50 (B)

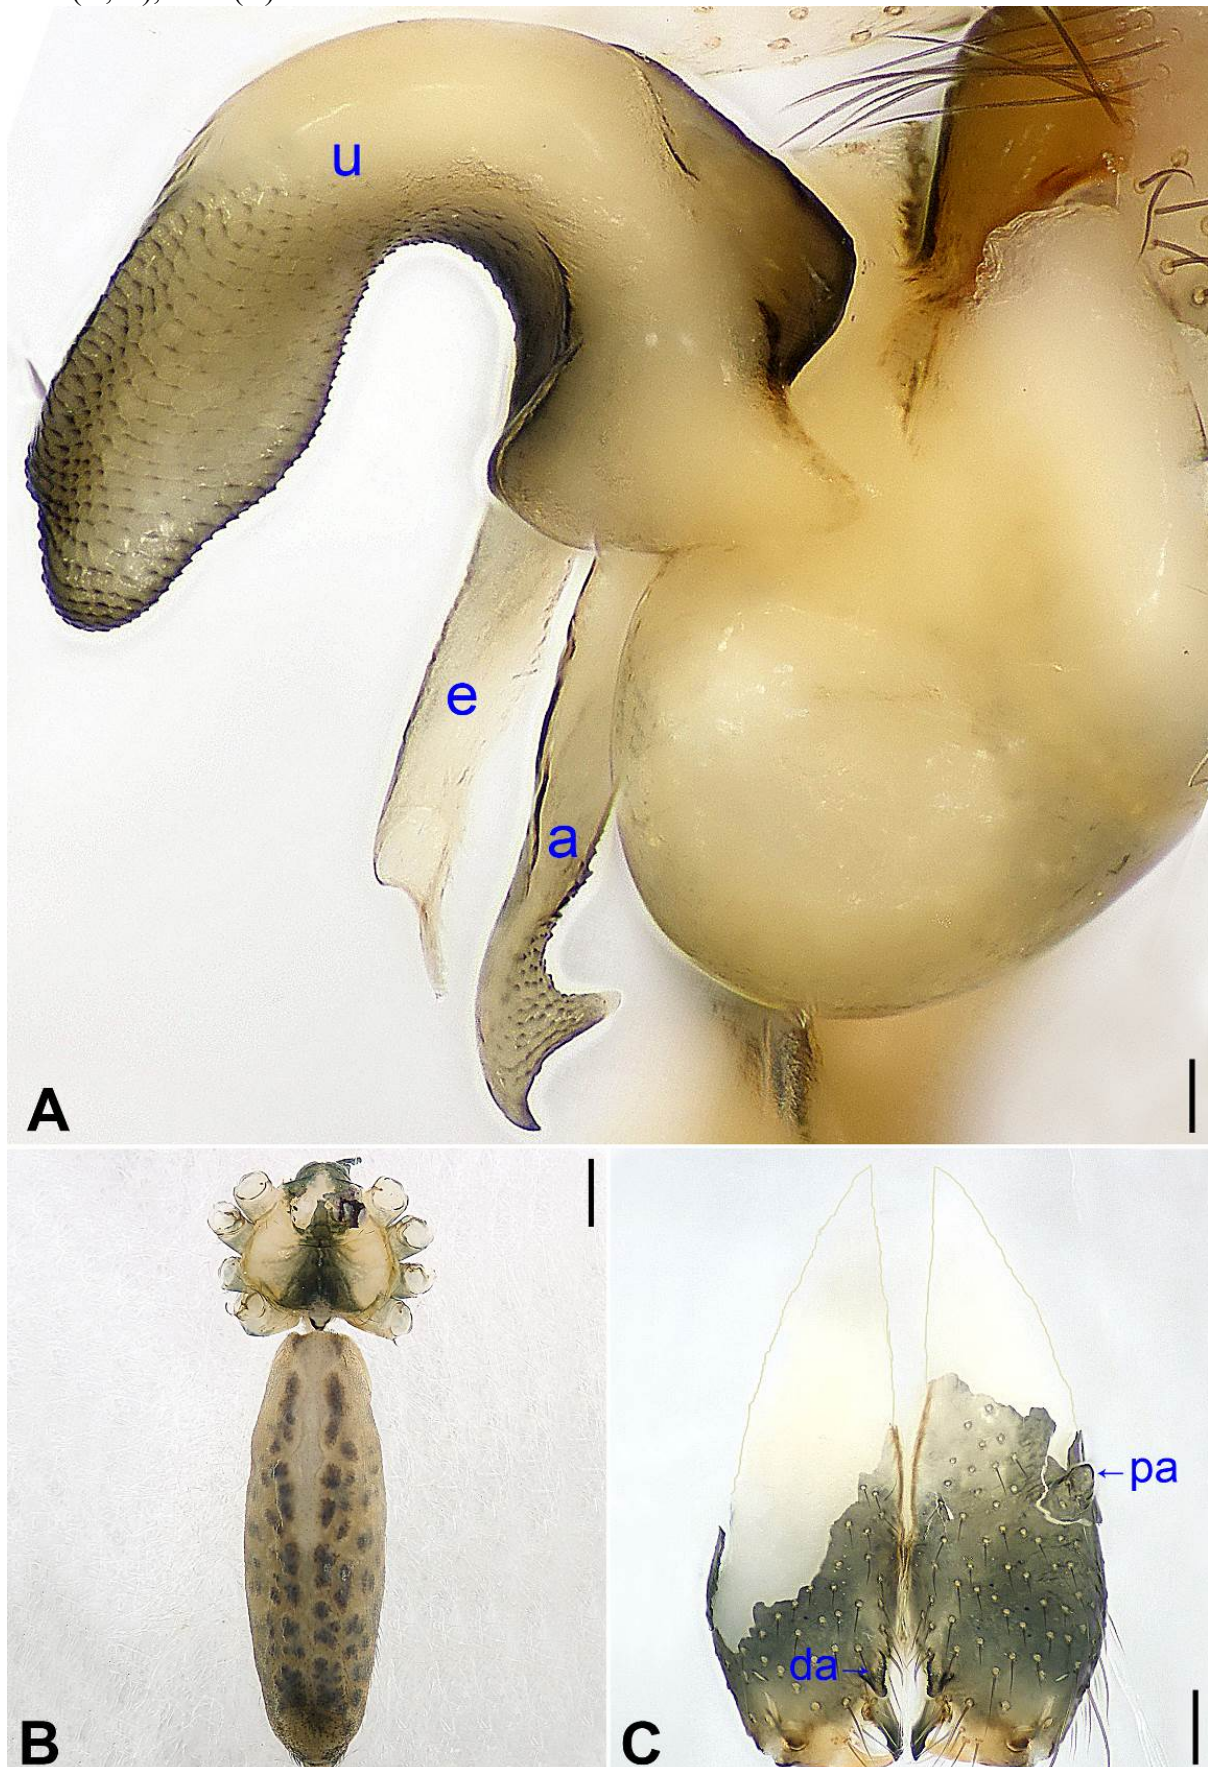

**Figure S28. Illustrations of *Uthina yunchuni* Yao & Li sp. nov., holotype female.** A, external genitalia, ventral view; B, vulva, dorsal view; C–E, habitus (C, dorsal view; D, ventral view; E, lateral view). Scale bars: 0.05 (A–B), 0.50 (C–E)

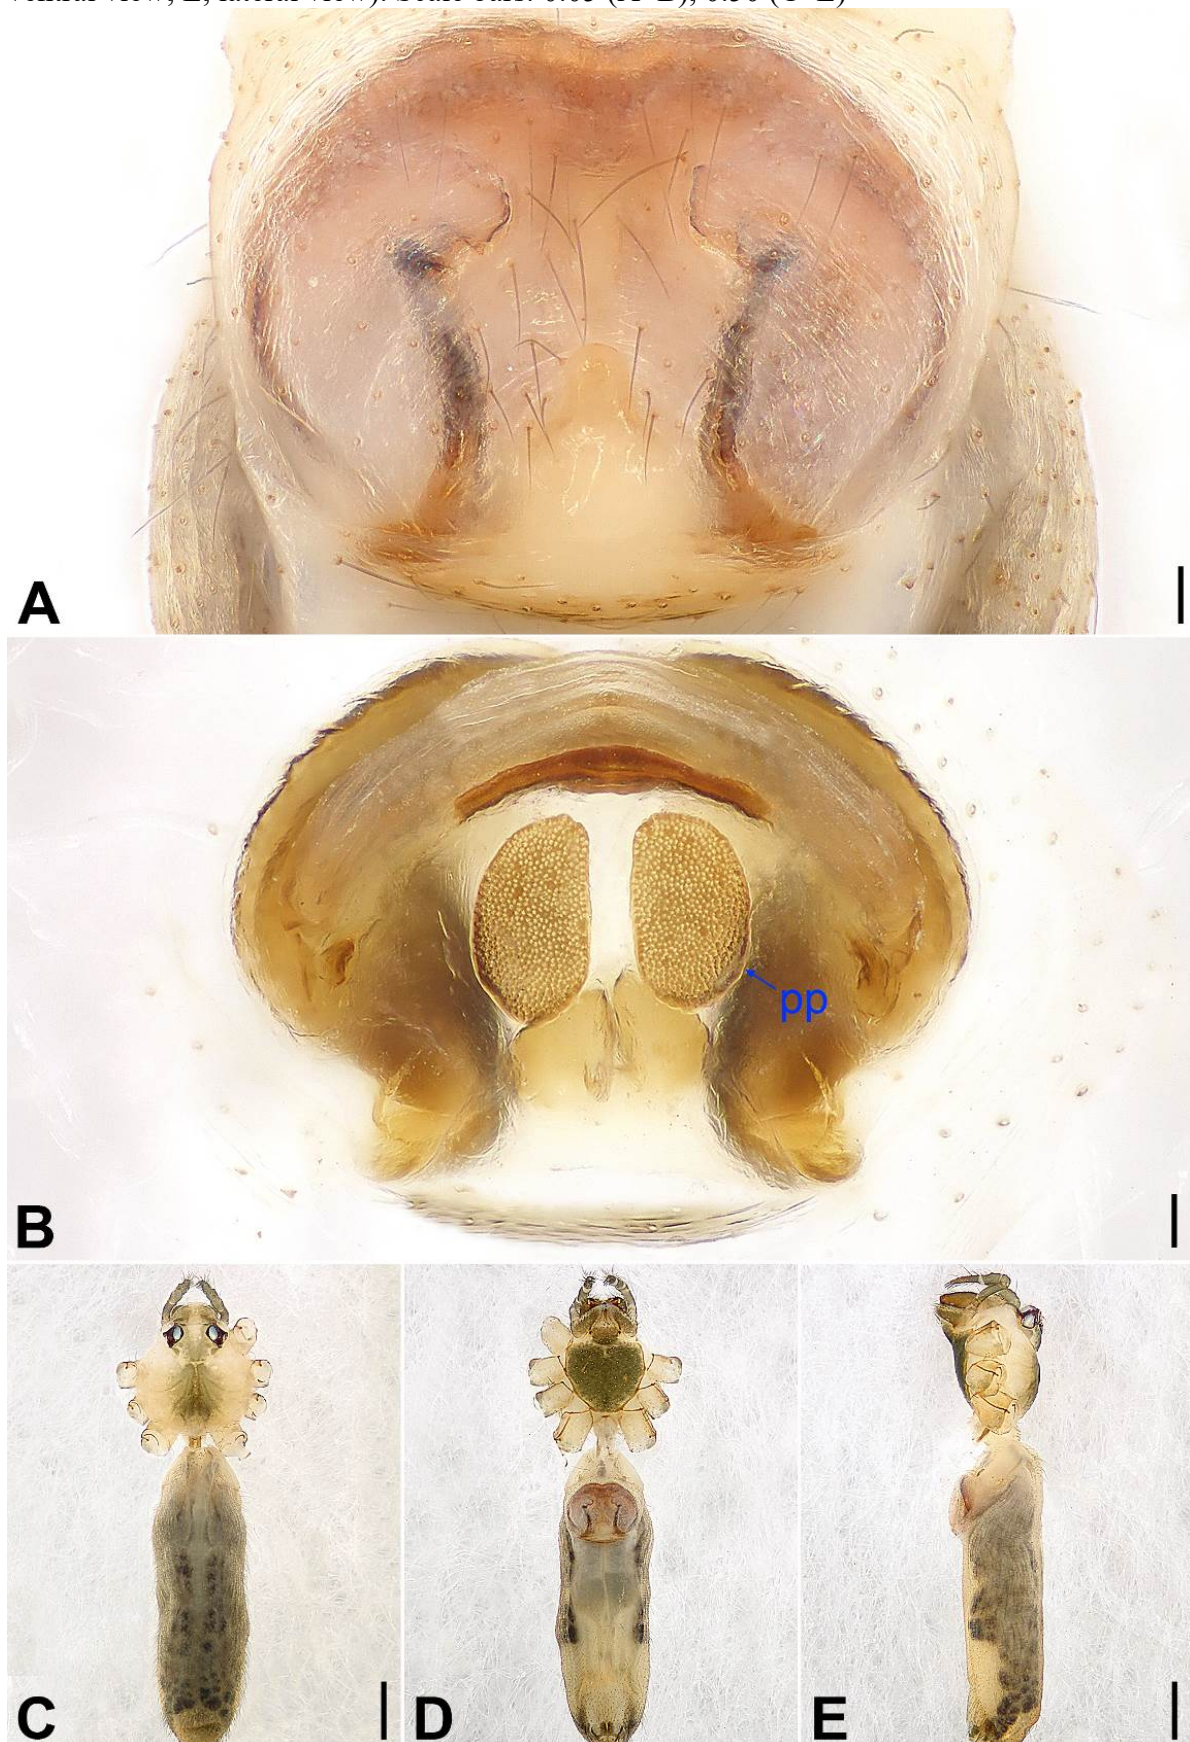

**Figure S29. Illustrations of *Uthina zhigangi* Yao & Li sp. nov., holotype female.** A, external genitalia, ventral view; B, vulva, dorsal view; C–E, habitus (C, dorsal view; D, ventral view; E, lateral view). Scale bars: 0.10 (A–B), 0.50 (C–E)

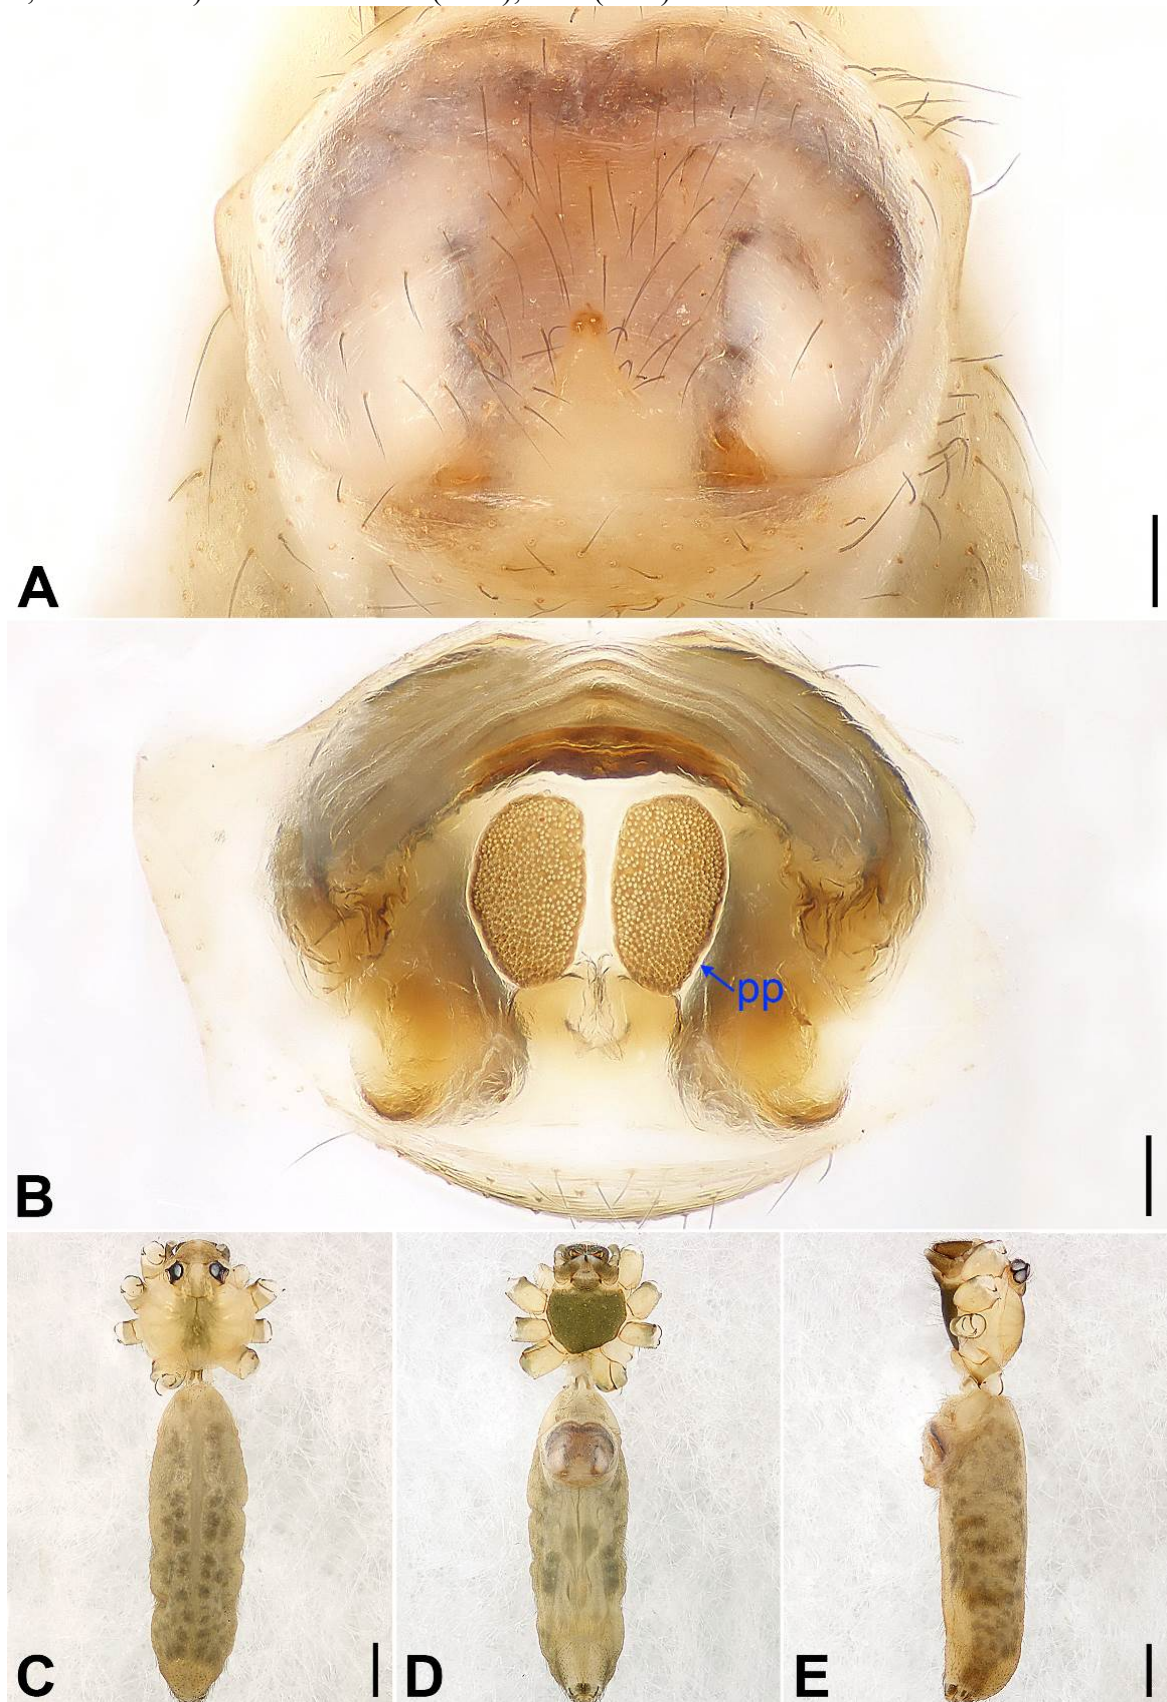

Supplement: srep35757-s1.pdf [file srep35757-s1.pdf]
